# Supplementary material
Source: PubMed Central journal article supplement (PMC4617663)
Supplement: NIHMS730113-supplement-Supplemental_Information.pdf [file NIHMS730113-supplement-Supplemental_Information.pdf]

# Fully Synthetic Granulocyte Colony-Stimulating Factor (G-CSF) Enabled by Isonitrile-Mediated Coupling of Large, Side-Chain Unprotected Peptides

Andrew G. Roberts,<sup>\*,‡,Ψ,†</sup> Eric V. Johnston,<sup>‡,Ψ,†</sup> Jae-Hung Shieh,<sup>||</sup> Joseph P. Sondey,<sup>†</sup> Ronald C. Hendrickson,<sup>†</sup> Malcolm A. S. Moore,<sup>||</sup> and Samuel J. Danishefsky<sup>\*,Ψ,†,ø</sup>

<sup>Ψ</sup>Laboratory for Bio-Organic Chemistry, <sup>†</sup>Chemical Biology Program and <sup>||</sup>Cell Biology Program, Sloan Kettering Institute (SKI) for Cancer Research, New York, New York 10065, United States of America

<sup>ø</sup>Department of Chemistry, Columbia University, New York, New York 10027, United States of America

**Supporting Information.**

## **Table of Contents**

|                                                                                                     |               |
|-----------------------------------------------------------------------------------------------------|---------------|
| <b>Title and Authors.</b>                                                                           | Page S1       |
| <b>Part I. Materials and General Procedures.</b>                                                    | Pages S3–S5   |
| <b>Part II. First Synthetic Approach to G-CSF 1–174 Aglycone (2a).</b>                              | Pages S6–S11  |
| Preparation of G-CSF 1–35 (4).                                                                      | Page S6       |
| Preparation of G-CSF 36–73 (5).                                                                     | Page S6       |
| Synthesis of G-CSF 1–73 (6).                                                                        | Page S7       |
| Preparation of G-CSF 74–126 (7).                                                                    | Page S8       |
| Preparation of G-CSF 127–174 (8).                                                                   | Page S9       |
| Synthesis of G-CSF 74–174 (9a) and Experimental Discussion.                                         | Page S9       |
| <b>Part III. Total Synthesis of G-CSF 1–174 Aglycone (2a).</b>                                      | Pages S12–S18 |
| Preparation of G-CSF 74–125 Thioacid (12).                                                          | Page S12      |
| Preparation of G-CSF 126–174 (13).                                                                  | Page S13      |
| Synthesis of G-CSF 74–174 (14) and Experimental Discussion.                                         | Page S14      |
| Synthesis of G-CSF 1–174 (22).                                                                      | Page S16      |
| Synthesis of G-CSF 1–174 Aglycone (2a).                                                             | Page S17      |
| <b>Part IV. Synthesis of G-CSF 127–174 (13) and Glycopeptide G-CSF 127–174 (21).</b>                | Pages S19–S23 |
| Preparation of G-CSF 126–149 (17).                                                                  | Page S19      |
| Preparation of G-CSF 150–174 (18).                                                                  | Page S19      |
| Synthesis of G-CSF 126–174 (13).                                                                    | Page S20      |
| Preparation of Glycopeptide G-CSF 126–135 Thioacid (19).                                            | Page S21      |
| Preparation of G-CSF 136–174 (20).                                                                  | Page S22      |
| Synthesis of Glycopeptide G-CSF 126–174 (21).                                                       | Page S23      |
| <b>Part V. Preparation of Thioesters (11, S-1, S-2, S-3) and Chitobiose Derivatives (S-4, S-5).</b> | Pages S24–S27 |
| Preparation of Gly Thioester Trifluoroacetate (11).                                                 | Page S24      |
| Preparation of Leu Thioester, H-Leu-(SPh) Hydrochloride (S-1).                                      | Page S24      |
| Preparation of Gly Thioester, H-Gly-(SEt) Hydrochloride (S-2).                                      | Page S24      |
| Preparation of Met Thioester, H-Met-(SEt) Hydrochloride (S-3).                                      | Page S25      |
| Preparation of chitobiose octaacetate (S-4) from chitin.                                            | Page S26      |
| Preparation of chitobiose $\beta$ -glycosylamine (S-5).                                             | Page S26      |
| <b>Part VI. Characterization Data for G-CSF 1–174 (22) and G-CSF 1–174 Aglycone (2a).</b>           | Pages S28–S30 |
| Circular Dichroism Spectra for G-CSF 1–174 Aglycone (2a).                                           | Page S28      |
| SDS-PAGE Data for G-CSF 1–174 (22) and G-CSF 1–174 Aglycone (2a).                                   | Page S29      |
| Proteolytic Mapping Data for G-CSF 1–174 Aglycone (2a).                                             | Page S30      |
| <b>Part VII. Biological Assay Data for G-CSF 1–174 Aglycone (2a).</b>                               | Pages S31–S33 |
| Assay I.                                                                                            | Page S31      |
| Assay II.                                                                                           | Page S32      |
| <b>Part VIII. Supporting Information References.</b>                                                | Page S34      |
| <b>Part IX. Selected Spectra.</b>                                                                   | Page S35–S80  |

## **Part I. Materials and General Procedures.**

**Materials and General Procedures.** All commercially available materials were used without further purification (Aldrich®, Fluka®, Novabiochem®). 2,2'-Azobis[2-(2-imidazolin-2-yl)propane]dihydrochloride (VA-044) was purchased from Wako Pure Chemical Industries. HATU was purchased from Genscript® (Piscataway, New Jersey). Bond-Breaker® solution was purchased from ThermoScientific®. Chitobiose octaacetate was purchased from Carbosynth Limited or prepared from chitin as described. All solvents were reagent grade or HPLC grade (Fisher®). All reactions were performed under an atmosphere of purified dry Argon (Ar) unless indicated otherwise. Low-resolution mass spectral analyses were performed with a JOEL JMS-DX-303-HF mass spectrometer or Waters Micromass ZQ mass spectrometer. Analytical TLC was performed on E. Merck silica gel 60 F254 plates and flash column chromatography was performed on E. Merck silica gel 60 (40–63 mm). Yields refer to chromatographically pure compounds.

**Abbreviations:** Boc- = *tert*-butyloxycarbonyl, DBU = 1,8-diazobicycloundec-7-ene, DMA = *N,N*-dimethylacetamide, DMF = *N,N*-dimethylformamide, EDC = 1-Ethyl-3-(3-dimethylaminopropyl)carbodiimide, Fmoc- = fluorenylmethyloxycarbonyl, HATU = (1-[Bis(dimethylamino)methylene]-1H-1,2,3-triazolo[4,5-b]pyridinium 3-oxid hexafluorophosphate), HBTU = (2-(1H-benzotriazol-1-yl)-1,1,3,3-tetramethyluronium hexafluorophosphate), HOObt = 3-Hydroxy-1,2,3-benzotriazin-4(3H)-one, NMP = *N*-methyl-2-pyrrolidinone, Oxyma Pure® = ethyl (hydroxyimino)cyanoacetate, TCEP = (tris(2-carboxyethyl)phosphine), TFA = trifluoroacetic acid, TFE = 2,2,2-trifluoroethanol.

### **HPLC-MS, UPLC-MS, HPLC Methods for Analysis and Purification:**

**HPLC-MS Analysis.** All separations involved a mobile phase of 0.05 v/v% TFA in water (Solvent A) and 0.04 v/v% TFA in acetonitrile (Solvent B). Analytical LC-MS analyses were performed using a Waters 2695 Separations Module and a Waters 996 Photodiode Array Detector equipped with Varian Microsorb 100-5, C18 150 × 2.0mm, Varian Microsorb 300-5, C8 250 × 2.0 mm columns and Varian Microsorb 300-5, C4 250 × 2.0 mm columns at a flow rate of 0.2 mL/min. Additional columns used for analysis or semi-preparative purifications were X-Bridge 5 μM, C8 150 × 2.1 mm (0.2 mL/min) and Higgins Analytical PROTO 300 5 μM, C4 250 × 4.6 mm (0.5 mL/min or 0.8 mL/min).

**UPLC-MS Analysis.** UPLC-MS analyses were performed using a Waters Acquity™ Ultra Performance LC system equipped with Acquity UPLC® BEH C18, 1.7 μl, 2.1 × 100 mm, Acquity UPLC® BEH C8, 1.7μl, 2.1 × 100 mm, Acquity UPLC® BEH 300 C4, 1.7 μl, 2.1 × 100 mm columns at a flow rate of 0.3 mL/min.

**Preparative HPLC.** All separations involved a mobile phase of 0.05 v/v% TFA in water (Solvent A) and 0.04 v/v% TFA in acetonitrile (Solvent B). Preparative separations were performed using a Rainin HPLC solvent delivery system equipped with a Rainin UV-1 detector and Agilent Dynamax reverse phase HPLC column Microsorb 100-8 C18 (250 × 21.4 mm), or Microsorb 300-5 C8 (250 × 21.4 mm), or Microsorb 300-5 C4 (250 × 21.4 mm) at a flow rate of 16.0 mL/min.

**High-Resolution Mass Spectrometry (HR-MS). *Intact protein LC-MS analysis:*** Intact protein LC-MS analysis was performed on a Waters Nano Acquity LC system coupled to an OrbiElite mass spectrometer (ThermoScientific) via a proxeon-2 nano ESI source. An aliquot of synthetic GCSF **22** or **2a** was injected onto nano ACQUITY UPLC system (Waters) in 20% CH<sub>3</sub>CN / water and captured on a C4 IngegraFrit Sample Trap Column 2.5 cm × 150 μm ID (New Objective, Woburn MA)

washed for 10 min at 5  $\mu$ L / min 20% CH<sub>3</sub>CN / water before injection onto a 75- $\mu$ m inner diameter  $\times$  10-cm length C4 analytical column (1.7  $\mu$ m BEH300; Waters) and elution with a binary linear gradient of 20-80% CH<sub>3</sub>CN in water with 0.1 % formic acid over 35 min (400 nL / min). Key parameters for the mass spectrometer were: automatic gain control (AGC)  $1 \times 10^6$  ions, FT resolution= 240000, scan range 300-2000, capillary temp 275  $^{\circ}$ C, S-lens RF=64%. For intact protein mode, the gas pressure in the Orbitrap was adjusted by measuring the FT pressure (FT penning gauge) with the HCD gas off and then adjusting the gas needle valve so that the FT pressure was approximately 0.05 - 0.1  $\times 10^{-10}$  Torr above that level with the HCD gas on.

### **Solid-Phase Peptide Synthesis (SPPS).**

**Solid-Phase Peptide Synthesis (SPPS) by Fmoc-Strategy.**<sup>[1,2]</sup> Automated SPPS was performed on an Applied Biosystems Pioneer continuous flow peptide synthesizer or a CEM Liberty Microwave Peptide Synthesizer. Peptides were synthesized using automated Fmoc- protocols. The deblock mixtures consisted of a mixture of 100:2:2 of DMF / DBU / piperidine or 4:1 DMF / piperidine with 0.1 M Oxyma Pure<sup>®</sup>.<sup>[3]</sup> The appropriate Boc- or Fmoc- amino acids and Fmoc-protected pseudoproline dipeptides<sup>[4]</sup> from Novabiochem<sup>®</sup> were employed as indicated. C-terminal thioesters were prepared with using a modification of elongation methods.<sup>[5]</sup>

### **Standard Amino Acid Residues Used.**

Fmoc-Ala-OH, Fmoc-Arg(Pbf)-OH, Fmoc-Asn(Trt)- OH, Fmoc-Asp(OtBu)-OH, Fmoc-Cys(*S*t-Bu)-OH, Fmoc-Gln(Trt)-OH, Fmoc-Asp(OAll)-OH, Fmoc-Glu(OtBu)-OH, Fmoc-Gly-OH, Fmoc-His(Trt)-OH, Fmoc-Ile-OH, Fmoc-Leu-OH, Fmoc-Lys(Boc)-OH, Fmoc-Met-OH, Fmoc-Phe-OH, Fmoc-Pro-OH, Fmoc-Ser(*t*Bu)-OH, Fmoc-Thr(*t*Bu)-OH, Fmoc-Thz-OH, Fmoc-Tyr(*t*Bu)-OH, Fmoc-Val-OH.

### **Representative Microwave SPPS Protocol.**<sup>[2]</sup>

Initial deprotection (add deblock solution, Power 30 W, 75  $^{\circ}$ C, 30 secs) / Wash with DMF

Deprotection - add deblock solution (Power 30 W, 75  $^{\circ}$ C, 180 secs) / Wash with DMF

Coupling - add amino acid (5 equiv, 0.2 M in DMF), add activator (5 equiv, 0.4 M Pyclock in DMF), add base (10 equiv, 2.0 M *i*-Pr<sub>2</sub>NEt in NMP), coupling (Power 0 W, RT, 120 secs; Power 15 W, 50  $^{\circ}$ C, 240 secs) / Wash with DMF

### **Peptide Cleavage and Deprotection.**

**Mild Cleavage from Resin to Access Fully Protected Peptides.** Upon completion of automated synthesis on a 0.1 mmol scale, the peptide resin was washed into a peptide synthesis vessel with MeOH. After drying, the resin was subjected to a cleavage cocktail (1:1:8 of acetic acid / TFE / methylene chloride) for 30 min (3  $\times$  8 mL) filtering after each treatment. The resulting cleavage solutions were pooled and concentrated. The oily residue was resuspended in minimum amount of acetic acid, precipitated with water, shell frozen and lyophilized.

**Acido Labile Protecting Group Removal, Cocktail B.** Peptides were subjected to Cocktail B (3 mL / 100 mg of peptide) consisting of TFA (88% by volume), water (5% by volume), phenol (5% by weight), and *i*-Pr<sub>3</sub>SiH (2% by volume). The resulting solution was concentrated to half of the original volume with an Ar stream, followed by induced precipitation with ice-cold diethyl ether (3  $\times$  40 mL) and centrifugation to give a white precipitate upon decantation. The precipitate was solubilized in water/acetonitrile (1:1, 0.05% TFA) and lyophilized. The resulting solid was purified by HPLC.

**Native Chemical Ligation.**

**Kinetic Chemical Ligation (KCL) Buffer.** The buffer required for kinetic chemical ligation (KCL) was freshly prepared prior to the reaction.  $\text{Na}_2\text{HPO}_4$  (56.6 mg, 0.4 mmol) was solubilized in water (1 mL), Guanidine·HCl (1.146 g, 12 mmol), and TCEP·HCl (10.8 mg, 0.04 mmol) were then added, solubilized, the volume adjusted to 2 mL and the pH was brought to the desired pH with a solution of NaOH (5 M). After 15 min of degassing with Ar while sonicating the solution was ready for use.

**Native Chemical Ligation Buffer.** The buffer required for native chemical ligation (NCL) was freshly prepared prior to the reaction.  $\text{Na}_2\text{HPO}_4$  (56.6 mg, 0.4 mmol) was solubilized in water (1 mL), Guanidine·HCl (1.146 g, 12 mmol), and TCEP·HCl (10.8 mg, 0.04 mmol) were then added, solubilized, the volume adjusted to 2 mL and the pH was brought to 7 with a solution of NaOH (5 M, 20  $\mu\text{L}$ ). After 15 min degassing with argon, 4-mercaptophenylacetic acid (MPAA) (67 mg, 0.4 mmol) was added and the pH was brought to the desired pH with a solution of NaOH (5 M). After 15 min of degassing with Ar while sonicating the solution was ready for use.

## Part II. First Synthetic Approach to G-CSF 1–174 Aglycone (2a).

### Preparation of G-CSF 1–35 (4).

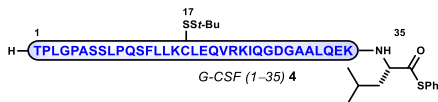

#### Sequence (4):

H-TPLGPASSLPQSFLKC(S*t*-Bu)LEQVRKIQGDGAALQEKL-(SPh)

**Chemical Formula:** C<sub>176</sub>H<sub>291</sub>N<sub>45</sub>O<sub>49</sub>S<sub>3</sub>

**Molecular Weight (g / mol):** 3,917.71

Following the general procedure for microwave-assisted Fmoc-based SPPS with deblock 4:1 DMF/piperidine, peptide (G-CSF 1-34) was prepared on 0.1 mmol scale from Fmoc-Lys(Boc)-NovaSyn® TGT resin (residue 34), Fmoc-Cys(S*t*-Bu)-OH (residue 17), Fmoc-Gln(Trt)-Ser( $\Psi^{\text{Me,Me}}$ Pro)-OH (residues 11-12), Fmoc-Ala-Ser( $\Psi^{\text{Me,Me}}$ Pro)-OH (residues 6-7) and Boc-Thr(*t*-Bu)-OH (residue 1). The peptide resin was subjected to mild cleavage protocol.

After lyophilization, the resultant fully protected peptide (0.1 mmol, G-CSF 1-34) was dissolved in chloroform (20 mL) and cooled to 0 °C with an ice-water bath. To the solution was added H-Leu-SPh•HCl **S-1** (104 mg, 4 equiv), HOObt (65 mg, 4 equiv) and EDC (71  $\mu$ L, 4 equiv). The resultant yellow solution was stirred for 3 h at 0 °C, allowed to reach RT, and stirred overnight (12 h). The solution was diluted with 5 vol % HOAc in chloroform (20 mL) and washed with H<sub>2</sub>O (2  $\times$  5 mL). The organic layer was washed with a saturated aqueous brine solution (5 mL), dried over Na<sub>2</sub>SO<sub>4</sub>, filtered and concentrated en vacuo to yield fully protected (G-CSF 1-35) as a crude yellow oil. The oil was diluted with HOAc (2 mL) and precipitated with H<sub>2</sub>O (30 mL). The resultant precipitous solution was shell-frozen and lyophilized. The resultant powder was treated with cocktail B (20 mL, 2 h) following the general procedure. The obtained crude pellet was dissolved in H<sub>2</sub>O/CH<sub>3</sub>CN (1:1, 0.05% TFA) and purified by HPLC (Microsorb 300-5 C8 column, 35% to 60% solvent B over 30 min). Product **4** eluted at 11.0 min. Lyophilization of the collected fractions provided peptide **4** (129 mg, 33%) as a white solid.

**See Figure 1.1A and Figure 1.1B** ESI-MS (+) of peptide **4**. M = C<sub>176</sub>H<sub>291</sub>N<sub>45</sub>O<sub>49</sub>S<sub>3</sub>. ESI calculated for [M+2H]<sup>2+</sup> *m/z*: 1959.86, found: 1959.42; [M+3H]<sup>3+</sup> *m/z*: 1306.91, found: 1306.40; [M+4H]<sup>4+</sup> *m/z*: 980.44, found: 979.96.

### Preparation of G-CSF 36–73 (5).

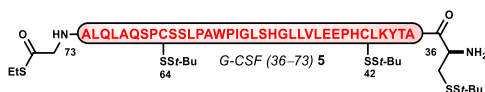

#### Sequence (5):

H-C(S*t*-Bu)ATYKLC(S*t*-Bu)HPEELVLLGHSLGIPWAPLSSC(S*t*-Bu)PSQALQLAG-(NH<sub>2</sub>)

**Chemical Formula:** C<sub>194</sub>H<sub>312</sub>N<sub>46</sub>O<sub>50</sub>S<sub>7</sub>

**Molecular Weight (g / mol):** 4,313.32

Following the general procedure for microwave-assisted Fmoc-based SPPS with deblock 4:1 DMF/piperidine, peptide (G-CSF 36-72) was prepared on 0.1 mmol scale from Fmoc-Ala-NovaSyn® TGT resin (residue 72), Fmoc-Cys(S*t*-Bu)-OH (residues 42, 64), Fmoc-Leu-Ser( $\Psi^{\text{Me,Me}}$ Pro)-OH (residues 61-62) and Boc-Cys(S*t*-Bu)-OH (residue 36). The peptide resin was subjected to mild cleavage protocol.

After lyophilization, the resultant fully protected peptide (0.1 mmol, G-CSF 36-72) was dissolved in chloroform (20 mL) and cooled to 0 °C with an ice-water bath. To the solution was added H-Gly-SEt•HCl **S-2** (63 mg, 4 equiv), HOObt (65

mg, 4 equiv) and EDC (71  $\mu$ L, 4 equiv). The resultant yellow solution was stirred for 3 h at 0  $^{\circ}$ C, allowed to reach RT, and stirred overnight (12 h). The solution was diluted with 5 vol % HOAc in chloroform (20 mL) and washed with H<sub>2</sub>O (2  $\times$  5 mL). The organic layer was washed with a saturated aqueous brine solution (5 mL), dried over Na<sub>2</sub>SO<sub>4</sub>, filtered and concentrated en vacuo to yield fully protected (G-CSF 36-73) as a crude yellow oil. The oil was diluted with HOAc (2 mL) and precipitated with H<sub>2</sub>O (30 mL). The resultant precipitous solution was shell-frozen and lyophilized. The resultant powder was treated with cocktail B (20 mL, 2 h) following the general procedure. The obtained crude pellet was dissolved in H<sub>2</sub>O/CH<sub>3</sub>CN (1:1, 0.05% TFA) and purified by HPLC (Microsorb 300-5 C8 column, 35% to 50% solvent B over 30 min). Product **5** eluted at 12.4 min. Lyophilization of the collected fractions provided peptide **5** (168 mg, 39%) as a white solid.

**See Figure 1.2A and Figure 1.2B** ESI-MS (+) of peptide **5**.  $M = C_{194}H_{312}N_{46}O_{50}S_7$ . ESI calculated for  $[M+3H]^3+$   $m/z$ : 1438.78, found: 1439.05;  $[M+4H]^4+$   $m/z$ : 1079.34, found: 1079.51;  $[M+5H]^5+$   $m/z$ : 863.67, found: 863.82.

### Synthesis of G-CSF 1–73 (**6**).

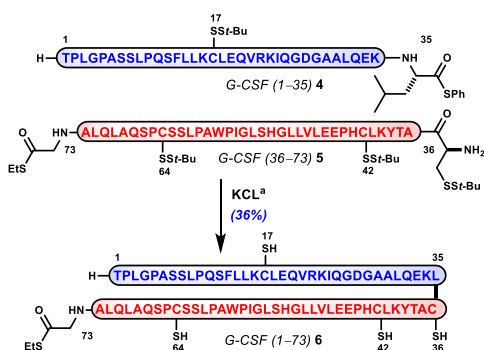

### Sequence (**6**):

H-TPLGPASSLPQSFLKCKLEQVRKIQQDGAALQEKLCATYKL—CHPEELVLLGHSLGIPWAPLSSCPSQALQLAG-(Set)

**Chemical Formula:** C<sub>348</sub>H<sub>565</sub>N<sub>91</sub>O<sub>99</sub>S<sub>5</sub>

**Molecular Weight (g / mol):** 7,768.19

To a solid mixture of pre-weighed peptide **4** (10 mg, 1 equiv) and peptide **5** (14 mg, 1.3 equiv) was added freshly prepared kinetic ligation buffer (1000  $\mu$ L, pH = 6.8). To this mixture was added neutral TCEP solution (0.5 M, 100  $\mu$ L). The reaction vial was flushed with Ar and stirred at RT for 12h. After completion, the mixture was diluted with H<sub>2</sub>O/CH<sub>3</sub>CN (1:1, 0.05% TFA, 2 mL) and neutral TCEP solution (0.5 M, 100  $\mu$ L). The solution was stirred for 10 min and purified directly by HPLC (Microsorb 300-5 C4 column, 15% to 90% solvent B over 30 min). Product **6** eluted at 13.3 min. Lyophilization of the collected fractions provided peptide **6** (7.5 mg, 38%) as a white solid.\*

**See Figure 1.3A and Figure 1.3B** ESI-MS (+) of peptide **6**.  $M = C_{348}H_{565}N_{91}O_{99}S_5$ . ESI calculated for  $[M+4H]^4+$   $m/z$ : 1943.06, found: 1943.32;  $[M+5H]^5+$   $m/z$ : 1554.65, found: 1555.05;  $[M+6H]^6+$   $m/z$ : 1295.71, found: 1295.78;  $[M+7H]^7+$   $m/z$ : 1110.75, found: 1110.87;  $[M+8H]^8+$   $m/z$ : 972.03, found: 972.32;  $[M+9H]^9+$   $m/z$ : 864.14, found: 864.60.

\*In a batch and time dependent manner, the presumed macrocyclic product resulting from the intramolecular cyclization of **6** could be observed as a minor product. The presumed macrocycle could be used without consequence in subsequent ligations.

**Sequence (macrocycle):**

H-TPLGPASSLPQSFLCLKCLEQVRKIQGDGAALQEKLKCATYKLCHEPEELVLLGHSLGIPWAPLSSCPSQALQLAG-(cyclic)

**Chemical Formula:** C<sub>346</sub>H<sub>559</sub>N<sub>91</sub>O<sub>99</sub>S<sub>4</sub>**Molecular Weight (g / mol):** 7,706.06

**See Figure 1.4A and Figure 1.4B** ESI-MS (+) of peptide **6** (macrocycle). M = C<sub>346</sub>H<sub>559</sub>N<sub>91</sub>O<sub>99</sub>S<sub>4</sub>. ESI calculated for [M+4H<sup>+</sup>]<sup>4+</sup> *m/z*: 1927.42, found: 1927.54; [M+5H<sup>+</sup>]<sup>5+</sup> *m/z*: 1542.22, found: 1542.59; [M+6H<sup>+</sup>]<sup>6+</sup> *m/z*: 1285.35, found: 1285.77; [M+7H<sup>+</sup>]<sup>7+</sup> *m/z*: 1101.87, found: 1102.24.

**Preparation of G-CSF 74–126 (7).**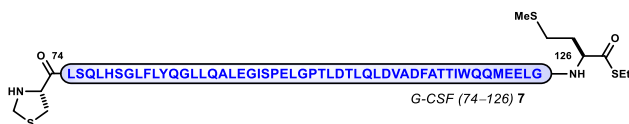**Sequence (7):**

H-C(Thz)LSQLHSGLFLYQGLLQALEGISPELGPTLDTLQLDVADFATTIWQQMEELGM-(SEt)

**Chemical Formula:** C<sub>265</sub>H<sub>414</sub>N<sub>62</sub>O<sub>81</sub>S<sub>4</sub>**Molecular Weight (g / mol):** 5,892.82

Following the general procedure for microwave-assisted Fmoc-based SPPS with deblock 4:1 DMF/piperidine, peptide (G-CSF 74-125) was prepared on 0.2 mmol scale from Fmoc-Gly-NovaSyn® TGT resin (residue 125), Fmoc-Asp(O*t*-Bu)-Thr(Ψ<sup>Me,Me</sup>Pro)-OH (residues 104-105), Fmoc-Ala-Thr(Ψ<sup>Me,Me</sup>Pro)-OH (residues 114-115) and Boc-Cys(Thz)-OH (residue 74). The peptide resin was subjected to mild cleavage protocol.

After lyophilization, the resultant fully protected peptide (0.2 mmol, G-CSF 74-125) was dissolved in chloroform (20 mL) and cooled to 0 °C with an ice-water bath. To the solution was added H-Met-SEt·HCl **S-3** (138 mg, 3 equiv), HOObt (98 mg, 3 equiv) and EDC (106 μL, 3 equiv). The resultant yellow solution was stirred for 3 h at 0 °C, allowed to reach RT, and stirred overnight (12 h). The solution was diluted with 5 vol % HOAc in chloroform (40 mL) and washed with H<sub>2</sub>O (2 × 5 mL). The organic layer was washed with a saturated aqueous brine solution (5 mL), dried over Na<sub>2</sub>SO<sub>4</sub>, filtered and concentrated en vacuo to yield fully protected (G-CSF 74-126) as a crude yellow oil. The oil was diluted with HOAc (4 mL) and precipitated with H<sub>2</sub>O (60 mL). The resultant precipitous solution was shell-frozen and lyophilized. The resultant powder was treated with cocktail B (40 mL, 2 h, twice) following the general procedure. The obtained crude pellet was dissolved in TFA (3 mL) and H<sub>2</sub>O/CH<sub>3</sub>CN (3:7, 0.05% TFA, 30-mL) and purified by HPLC (Microsorb 300-5 C4 column, 60% to 95% solvent B over 30 min). Product **7** eluted at 17.0 min. Lyophilization of the collected fractions provided peptide **7** (50 mg, 4%) as a white solid.\*

\*Precipitation of **7** from crude solutions was common during purification. The product could be re-isolated by centrifugation and re-dissolution prior to HPLC purification. Elution of product **7** was with broadened peak shape and in some cases chromatography was difficult to reproduce. The corresponding CO<sub>2</sub> adduct of Trp118 was a minor side product that complicates purification.

**See Figure 1.5A and Figure 1.5B** ESI-MS (+) of peptide **7**. M = C<sub>265</sub>H<sub>414</sub>N<sub>62</sub>O<sub>81</sub>S<sub>4</sub>. ESI calculated for [M+3H<sup>+</sup>]<sup>3+</sup> *m/z*: 1965.28, found: 1965.52; [M+4H<sup>+</sup>]<sup>4+</sup> *m/z*: 1474.21, found: 1474.41; [M+5H<sup>+</sup>]<sup>5+</sup> *m/z*: 1179.57, found: 1179.66.



## Preparation of G-CSF 127–174 (8).

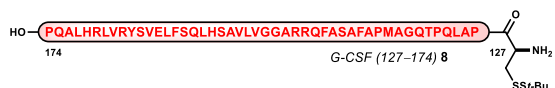

### Sequence (8):

H-C(S<sub>t</sub>-Bu)PALQPTQGAMPAFASAFQRRAGGVLVASHLQSFLEVSYRVLRLHLAQP-(OH)

**Chemical Formula:** C<sub>236</sub>H<sub>375</sub>N<sub>69</sub>O<sub>62</sub>S<sub>3</sub>

**Molecular Weight (g / mol):** 5,267.20

Following the general procedure for microwave-assisted Fmoc-based SPPS with deblock 4:1 DMF/piperidine, peptide (G-CSF 127-174) was prepared on 0.2 mmol scale from Fmoc-Pro-NovaSyn® TGT resin (residue 174), Fmoc-Val-Ser(Ψ<sup>Me,Me</sup>Pro)-OH (residues 163-164), Fmoc-Gln(Trt)-Ser(Ψ<sup>Me,Me</sup>Pro)-OH (residues 158-159), Fmoc-Ala-Ser(Ψ<sup>Me,Me</sup>Pro)-OH (residues 154-155, 141-142) and Fmoc-Cys(S<sub>t</sub>-Bu)-OH (residue 127). The peptide resin was subjected to mild cleavage protocol.

After lyophilization, the resultant fully protected peptide (0.2 mmol, G-CSF 127-174) was treated with cocktail B (20 mL, 2h, twice) following the general procedure. The obtained crude pellet was dissolved in H<sub>2</sub>O/CH<sub>3</sub>CN (1:1, 0.05% TFA) and purified by HPLC (Microsorb 300-5 C8 column, 40% to 65% solvent B over 30 min). Product **8** eluted at 11.5 min. Lyophilization of the collected fractions provided peptide **8** (320 mg, 30%) as a white solid.

**See Figure 1.6A and Figure 1.6B** ESI-MS (+) of peptide **8**. M = C<sub>236</sub>H<sub>375</sub>N<sub>69</sub>O<sub>62</sub>S<sub>3</sub>. ESI calculated for [M+3H]<sup>3+</sup> *m/z*: 1756.74, found: 1756.51; [M+4H]<sup>4+</sup> *m/z*: 1317.81, found: 1317.52; [M+5H]<sup>5+</sup> *m/z*: 1054.45, found: 1054.08.

## Synthesis of G-CSF 74–174 (9a) and Experimental Discussion.

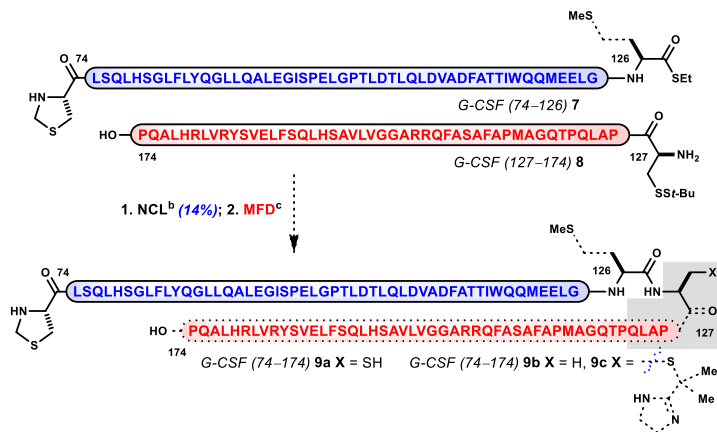

### Sequence (9a):

H-C(Thz)LSQLHSGLFLYQGLLQALEGISPELGPTLDTLQLDVADFATTIWQQMEELGM—CPALQPTQGAMPAFASAFQRRAGGVLVASHLQSFLEVSYRVLRLHLAQP-(OH)

**Chemical Formula:** C<sub>495</sub>H<sub>775</sub>N<sub>131</sub>O<sub>143</sub>S<sub>5</sub>

**Molecular Weight (g / mol):** 11,009.72

### Step 1:

To a solid mixture of pre-weighed peptide **7** (3.6 mg, 1 equiv) and peptide **8** (14 mg, 1.1 equiv) was added freshly prepared ligation buffer (400 μL, pH = 7.6). To this mixture was added neutral TCEP solution (0.5 M, 50 μL). The reaction vial was flushed with Ar and stirred at RT for 12h. After completion, the mixture was diluted with H<sub>2</sub>O/CH<sub>3</sub>CN (3:7, 0.05%

TFA, 2 mL) and neutral TCEP solution (0.5 M, 100  $\mu$ L). The solution was stirred for 10 min and precipitated with ice cold H<sub>2</sub>O (3 mL). The precipitous solution was centrifugated and the resultant pellet was redissolved with TFA (100  $\mu$ L), diluted with H<sub>2</sub>O/CH<sub>3</sub>CN (3:7, 0.05% TFA, 2 mL) and neutral TCEP solution (0.5 M, 100  $\mu$ L) and purified directly by HPLC (Microsorb 300-5 C4 column, 60% to 90% solvent B over 30 min). Product **9a** eluted at 17.0 min. Lyophilization of the collected fractions provided peptide **9a** (0.91 mg, 14%) as a white solid.

For crude reaction analysis, see **Figure 1.7A** and **Figure 1.7B**.

**See Figure 1.8A and Figure 1.8B** ESI-MS (+) of peptide **9a**. M = C<sub>495</sub>H<sub>775</sub>N<sub>131</sub>O<sub>143</sub>S<sub>5</sub>. ESI calculated for [M+6H]<sup>6+</sup> m/z: 1835.96, found: 1836.49; [M+7H]<sup>7+</sup> m/z: 1573.83, found: 1573.91; [M+8H]<sup>8+</sup> m/z: 1377.22, found: 1377.29; [M+9H]<sup>9+</sup> m/z: 1224.31, found: 1224.74; [M+10H]<sup>10+</sup> m/z: 1101.98, found: 1102.08; [M+11H]<sup>11+</sup> m/z: 1001.89, found: 1002.02.

#### Attempted Preparation of G-CSF 74–174 (**9b**).

**General Metal-Free Dethylation Procedure.** To a solution of the purified ligation product (1.0 mg) in 0.2 ml of degassed buffer (6 M Gnd-HCl, 200 mM Na<sub>2</sub>HPO<sub>4</sub>) was added 0.2 ml of 0.5 M bond-breaker<sup>®</sup> TCEP solution (Pierce), 0.05 ml of 2-methyl-2-propanethiol, and 0.1 ml of radical initiator VA-044 (0.1 M in H<sub>2</sub>O). The reaction mixture was stirred at 37 °C and monitored by UPLC-MS following aliquot quench with the addition of acetonitrile / water / TFA.

#### Step 2:

Attempted Procedure: To a suspension of peptide **9a** (3.0 mg) in Ar sparged DMF (1.5 mL) was added neutral TCEP solution (0.5 M, 500  $\mu$ L) and 2-methyl-2-propanethiol (120  $\mu$ L). This solution was further sparged with Ar for 15 min followed by the addition of VA-044 (240  $\mu$ L of 33 mg/mL H<sub>2</sub>O solution). The mixture was sealed under Ar and stirred at RT or elevated temperature and monitored by UPLC-MS following aliquot quench.

Alternative conditions including the substitution of VA-044 with VA-055 or azobisisobutyronitrile (AIBN) and or the substitution of DMF for NMP or DMSO were unsuccessful. Species identified from the attempted desulfurization of **9a** include the desired product **9b** and the radical initiator adduct of **9a** referred to as **9c** as a mostly inseparable mixture.

#### Products observed by UPLC-MS:

For crude reaction analysis, see **Figure 1.9A**, **Figure 1.9B**, **Figure 1.9C** and **Figure 1.9D**.

#### Sequence (**9b**):

H-C(Thz)LSQLHSGFLYQGLLQALEGISPELGPTLDTLQLDVADFATTIWQQMEELGM—  
APALQPTQGAMPAFASAFQRRAGGVLVASHLQSFLEVSYRVLRHLAQP-(OH)

**Chemical Formula:** C<sub>495</sub>H<sub>775</sub>N<sub>131</sub>O<sub>143</sub>S<sub>4</sub>

**Molecular Weight (g / mol):** 10,977.66

**9b**, ESI calculated for [M+8H]<sup>8+</sup> m/z: 1373.22, found: 1373.62, [M+7H]<sup>7+</sup> m/z: 1569.25, found: 1569.68; [M+6H]<sup>6+</sup> m/z: 1830.62, found: 1831.00.

**Sequence (9c):**

H-C(Thz)LSQLHSGLFLYQGGLLQALEGISPELGPTLDTLQLDVADFATTIWQQMEELGM—

C(adduct)PALQPTQGAMPAFASAFQRRAGGVLVASHLQSFLEVSYRVLRLAQP-(OH)

**Chemical Formula:** C<sub>501</sub>H<sub>785</sub>N<sub>133</sub>O<sub>143</sub>S<sub>5</sub>

**Molecular Weight (g / mol):** 11,119.88

**9c**, ESI calculated for [M+8H<sup>+</sup>]<sup>8+</sup> *m/z*: 1390.99, found: 1391.18, [M+7H<sup>+</sup>]<sup>7+</sup> *m/z*: 1589.56, found: 1589.86; [M+6H<sup>+</sup>]<sup>6+</sup> *m/z*: 1854.32, found: 1854.63.

## Part III. Total Synthesis of G-CSF 1–174 Aglycone (2a).

### Preparation of G-CSF 74–125 Thioacid (12).

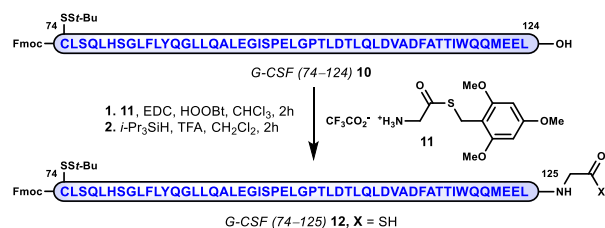

### Sequence (12):

Fmoc-C(S*t*-Bu)LSQLHSGLFLYQGLLQALEGISPELGPTLDTLQLDVADFATTIWQQMEELG-(SH)

**Chemical Formula:** C<sub>276</sub>H<sub>419</sub>N<sub>61</sub>O<sub>82</sub>S<sub>4</sub>

**Molecular Weight (g / mol):** 6,031.97

Following the general procedure for microwave-assisted Fmoc-based SPPS with deblock 4:1 DMF/piperidine, peptide (G-CSF 74-124) was prepared on 0.2 mmol scale from Fmoc-Leu-NovaSyn® TGT resin (residue 124), Fmoc-Trp-OH (residue 118), Fmoc-Ala-Thr( $\Psi^{\text{Me,Me}}$ Pro)-OH (residues 114-115), Fmoc-Asp(OMpe)-OH (residues 108, 111), Fmoc-Asp(O*t*-Bu)-Thr( $\Psi^{\text{Me,Me}}$ Pro)-OH (residues 104-105) and Fmoc-Cys(S*t*-Bu)-OH (residue 74). The peptide resin was subjected to mild cleavage protocol.

After lyophilization, the resultant fully protected peptide (assumed 0.14 mmol by mass recovered, G-CSF 74-124) was dissolved in chloroform (14 mL) and cooled to 0 °C with an ice-water bath. To the solution was added **11** (158 mg, 3 equiv), HOObt (70 mg, 3 equiv) and EDC (75  $\mu$ L, 3 equiv). The resultant yellow solution was stirred for 3 h at 0 °C, allowed to reach RT, diluted with 5 vol % HOAc in chloroform (40 mL) and washed with H<sub>2</sub>O (2  $\times$  5 mL). The organic layer was washed with a saturated aqueous brine solution (5 mL), dried over Na<sub>2</sub>SO<sub>4</sub>, filtered and concentrated en vacuo to yield fully protected (G-CSF 74-125) as a crude yellow oil. The oil was diluted with HOAc (4 mL) and precipitated with H<sub>2</sub>O (60 mL). The resultant precipitous solution was shell-frozen and lyophilized. The resultant powder was treated with a modified cocktail B (24 mL, 2 h, twice) following the general procedure (Modified Cocktail B, water removed and solution is diluted: 200 mg phenol dissolved in methylene chloride (12 mL) and TFA (12 mL), add 600  $\mu$ L *t*-Pr<sub>3</sub>SiH).

**Purification of (12) by HPLC.** From a similar 0.2 mmol scale batch, the obtained crude pellet was dissolved in TFA (3 mL) and H<sub>2</sub>O/CH<sub>3</sub>CN (3:7, 0.05% TFA, 30 mL) and purified by HPLC (Microsorb 300-5 C8 column, 70% to 95% solvent B over 30 min). Product **12** eluted at 22.0 min. Lyophilization of the collected fractions provided peptide **12** (30 mg, 2%) as a white solid. Low yield is reflective of broadened peak shape during chromatography as well as observed hydrolysis of **12** to the corresponding carboxylic acid during chromatography or prolonged storage of the crude solution of **12**.

**See Figure 1.10A and Figure 1.10B** ESI-MS (+) of peptide **12** from LC-MS analysis. M = C<sub>276</sub>H<sub>419</sub>N<sub>61</sub>O<sub>82</sub>S<sub>4</sub>. ESI calculated for [M+3H]<sup>3+</sup> *m/z*: 2011.67, found: 2012.30; [M+4H]<sup>4+</sup> *m/z*: 1509.00, found: 1509.26; [M+5H]<sup>5+</sup> *m/z*: 1207.40, found: 1207.92. \* indicates presence of corresponding carboxylic acid in sample or due to hydrolysis during chromatography.

**See Figure 1.10C, and Figure 1.10D** ESI-MS (+) of peptide **12** from UPLC-MS analysis. M = C<sub>276</sub>H<sub>419</sub>N<sub>61</sub>O<sub>82</sub>S<sub>4</sub>. ESI calculated for [M+4H]<sup>4+</sup> *m/z*: 1509.00, found: 1509.95; [M+5H]<sup>5+</sup> *m/z*: 1207.40, found: 1208.03.

**Purification of (12) by C<sub>2</sub> Silica Gel Flash Chromatography.** An alternative purification affords **12** with comparable purity suitable for subsequent use in isonitrile-mediated ligations. The hydrophobic nature of **12** makes standard HPLC chromatography (C4 or C8) challenging and difficult to reproduce. The use of Biotage Isolute® C<sub>2</sub> silica gel on a flash chromatography system allows **12** to be purified in fewer injections and in less time on the column. Column dimensions 30 × 100 mm, approximately 15 g C<sub>2</sub> silica gel. From the above preparation (0.2 mmol), a portion of crude **12** (approximately 1/6 of material) was dissolved in 100 μL TFA and 500 μL H<sub>2</sub>O/CH<sub>3</sub>CN (3:7, 0.05% TFA) and loaded onto an equilibrated C<sub>2</sub> silica gel column (equilibrated successively with CH<sub>3</sub>CN → H<sub>2</sub>O → H<sub>2</sub>O/CH<sub>3</sub>CN (1:1, 0.05% TFA)). A stepwise gradient was employed at a flow rate of 12 mL/min, H<sub>2</sub>O/CH<sub>3</sub>CN (1:1, 0.05% TFA, 6 CV) → H<sub>2</sub>O/CH<sub>3</sub>CN (1:3, 0.05% TFA, 7 CV) → CH<sub>3</sub>CN (0.05% TFA, 7 CV). The product **12** was eluted in several 8 mL fractions during H<sub>2</sub>O/CH<sub>3</sub>CN (1:3, 0.05% TFA) elution (at approximately 12 min of a 20 min run). The entire batch of crude **12** was purified in 6 injections. Lyophilization of the collected fractions provided peptide **12** (240 mg, 20%) as a white solid. Purified **12** obtained from this method contains a minor amount of trifluoroacetylated (-COCF<sub>3</sub>) derivatives.

For UV-chromatogram from flash chromatography purification, see **Figure 1.11A**.

**See Figure 1.11B and Figure 1.11C Top:** ESI-MS (+) of peptide **12** + -COCF<sub>3</sub>. M = C<sub>278</sub>H<sub>418</sub>F<sub>3</sub>N<sub>61</sub>O<sub>83</sub>S<sub>4</sub>. ESI calculated for [M+4H<sup>+</sup>]<sup>4+</sup> m/z: 1533.00, found: 1532.96; [M+5H<sup>+</sup>]<sup>5+</sup> m/z: 1226.60, found: 1226.40. Bottom: ESI-MS (+) of peptide **12**. M = C<sub>276</sub>H<sub>419</sub>N<sub>61</sub>O<sub>82</sub>S<sub>4</sub>. ESI calculated for [M+4H<sup>+</sup>]<sup>4+</sup> m/z: 1509.00, found: 1508.86; [M+5H<sup>+</sup>]<sup>5+</sup> m/z: 1207.40, found: 1207.23.

#### Preparation of G-CSF 126–174 (**13**).

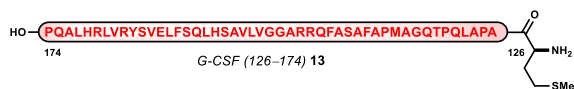

#### Sequence (**13**):

H-MAPALQPTQGAMPAPFASAFQRRRAGGVLVASHLQSFLEVSYRVLRLHLAQP-(OH)

**Chemical Formula:** C<sub>237</sub>H<sub>376</sub>N<sub>70</sub>O<sub>63</sub>S<sub>2</sub>

**Molecular Weight (g / mol):** 5,278.16

Following the general procedure for microwave-assisted Fmoc-based SPPS with deblock 4:1 DMF/piperidine, peptide (G-CSF 126-174) was prepared on 0.2 mmol scale from Fmoc-Pro-NovaSyn® TGT resin (residue 174), Fmoc-Val-Ser(Ψ<sup>Me,Me</sup>Pro)-OH (residues 163-164), Fmoc-Gln(Trt)-Ser(Ψ<sup>Me,Me</sup>Pro)-OH (residues 158-159), Fmoc-Ala-Ser(Ψ<sup>Me,Me</sup>Pro)-OH (residues 154-155, 141-142) and Fmoc-Met-OH (residue 126). The peptide resin was subjected to mild cleavage protocol.

After lyophilization, the resultant fully protected peptide (0.2 mmol, G-CSF 127-174) was treated with cocktail B (20 mL, 2h, twice) following the general procedure. The obtained crude pellet was dissolved in H<sub>2</sub>O/CH<sub>3</sub>CN (1:1, 0.05% TFA) and purified by HPLC (Microsorb 300-5 C8 column, 40% to 65% solvent B over 30 min). Product **13** eluted at 11.0 min. Lyophilization of the collected fractions provided peptide **13** (314 mg, 30%) as a white solid.

**See Figure 1.12A and Figure 1.11B** ESI-MS (+) of peptide **13**. M = C<sub>237</sub>H<sub>376</sub>N<sub>70</sub>O<sub>63</sub>S<sub>2</sub>. ESI calculated for [M+3H<sup>+</sup>]<sup>3+</sup> m/z: 1760.39, found: 1761.75; [M+4H<sup>+</sup>]<sup>4+</sup> m/z: 1320.55, found: 1321.55; [M+5H<sup>+</sup>]<sup>5+</sup> m/z: 1056.64, found: 1057.38; [M+6H<sup>+</sup>]<sup>6+</sup> m/z: 880.70, found: 881.37.

## Synthesis of G-CSF 74–174 (14) and Experimental Discussion.

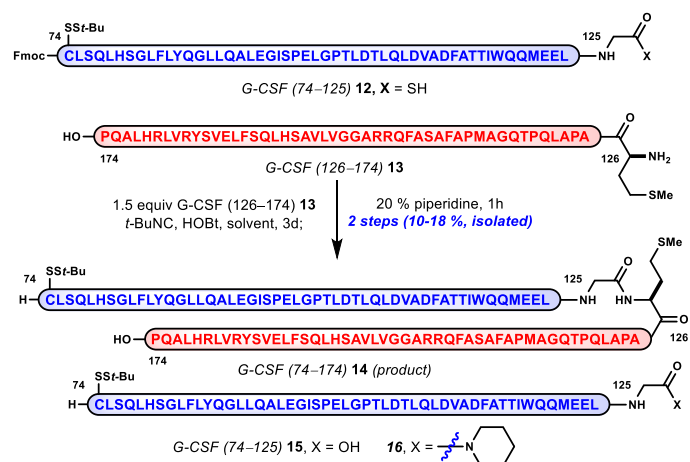

### Sequence (14):

H-C(S<sup>t</sup>-Bu)LSQLHSGFLYQGLLQALEGISPELGPTLDTLQLDVADFATTIWQQMEELG—MAPALQPTQGAMPAFASAFQRRAGGVLVASHLQSFLEVSRYRVLRLHLAQP-(OH)

**Chemical Formula:** C<sub>498</sub>H<sub>783</sub>N<sub>131</sub>O<sub>143</sub>S<sub>5</sub>

**Molecular Weight (g / mol):** 11,053.82

**General Procedure.** To an oven-dried 4-mL vial was added thioacid G-CSF 74–125 **12** (5.0 mg, 0.83 μmol, 1 equiv), N-terminal amine nucleophile G-CSF 126–174 **13** (6.6 mg, 1.24 μmol, 1.5 equiv), and HOBt (1.3 mg, 8.3 μmol, 10 equiv). A stir bar was added, followed by the addition of anhydrous solvent in accordance with the table (1.4 mM = 600 μL, 2.8 mM = 300 μL, 5.6 mM = 150 μL). The heterogeneous mixture was stirred at RT for 5 min followed by the addition of *tert*-butyl isonitrile via syringe from a 86.6 mM stock-solution prepared in DMF (29 μL, 2.49 μmol, 3.0 equiv). The reactions were capped and stirred for 72h. At t = 72 h, reactions were diluted with 300 μL deblock solution (20 vol % piperidine in DMF) and stirred vigorously at RT for 1h, cooled in dry ice, followed by precipitation with ice cold diethyl ether (6 mL). The precipitate was centrifugated (5 min, 5 °C, 5000 rpm) and the supernatant was decanted (repeated twice). The resultant pellet was frozen in liquid nitrogen and lyophilized prior to dissolution and purification by semi-preparative HPLC.

| Entry | Solvent | Conc.  | t-BuNC  | HOBt     | Ratio (14 : 15 : 16) <sup>a</sup> | % of 14 <sup>a</sup> | Yield <sup>b</sup> |
|-------|---------|--------|---------|----------|-----------------------------------|----------------------|--------------------|
| 1     | DMF     | 2.8 mM | 3 equiv | 10 equiv | 1.9 : 3.1 : 1                     | 32                   | 11%                |
| 2     | NMP     | 2.8 mM | 3 equiv | 10 equiv | 1.6 : 2.5 : 1                     | 31                   | - <sup>c</sup>     |
| 3     | DMA     | 2.8 mM | 3 equiv | 10 equiv | 3.1 : 2.6 : 1                     | 46                   | 11%                |
| 4     | DMF     | 1.4 mM | 3 equiv | 10 equiv | 1.5 : 2.1 : 1                     | 33                   | 16%                |
| 5     | DMA     | 5.6 mM | 3 equiv | 10 equiv | 3.7 : 3.8 : 1                     | 44                   | 18%                |
| 6     | DMF     | 2.8 mM | 0 equiv | 10 equiv | 1 : 13.1 : 15.2                   | 3                    | ND                 |
| 7     | DMA     | 2.8 mM | 0 equiv | 10 equiv | 1 : 9.9 : 10.7                    | 5                    | ND                 |
| 8     | DMA     | 2.8 mM | 3 equiv | 0 equiv  | 1 : 4.7 : 2.5                     | 12                   | ND                 |
| 9     | DMA     | 2.8 mM | 3 equiv | 10 equiv | 2.4 : 1.4 : 1                     | 50                   | 10%                |

**TABLE S-1. Optimization of Coupling Conditions for the Preparation of G-CSF 74–174 (14).** a) Determined by relative integration (area under the curve, AUC) of the corresponding UV-peaks at 280 nm; b) Yields refer to HPLC purified material and account for material loss due to reaction monitoring, ND = not determined; c) sample oxidation and aggregation upon work-up.

**Reaction monitoring.** At the indicated timepoints (t = 20h, 44h, 72h) a 20 μL aliquot was taken and diluted with 100 μL of deblock solution (20 vol % piperidine in DMF). The Fmoc- removal reaction was allowed to stir at RT for 1h and subsequently cooled in dry ice followed by precipitation with of cold diethyl ether (1 mL). The precipitate was centrifugated (5 min, 5 °C,

5000 rpm) and the supernatant was decanted. The resultant pellet was frozen in liquid nitrogen and lyophilized prior to UPLC-MS analysis. The dried pellet was redissolved in 40  $\mu$ L TFA, 50  $\mu$ L acetonitrile, 10  $\mu$ L water (in that order) followed by immediate UPLC-MS analysis. Relative product ratios were determined by integration of corresponding UV peaks analyzed at 280 nm.<sup>[6,7]</sup>

**Reaction purification.** (Entries 1, 3-5, 9) The dried pellet was re-dissolved in 100  $\mu$ L TFA and 200  $\mu$ L acetonitrile. This solution was precipitated by the addition of 10 mL water. The resultant cloudy solution was frozen in liquid nitrogen and lyophilized prior to re-dissolution for purification. ***This re-lyophilization process was essential to minimize product loss due to significant aggregation.*** The resultant crude powder was dissolved in 100  $\mu$ L TFA, 200  $\mu$ L acetonitrile, and 20  $\mu$ L water (in that order). The crude solution was purified in 3  $\times$  100  $\mu$ L injections by semi-preparative HPLC. Isolated yields are reflective of pure products obtained after lyophilization of corresponding fractions. Theoretical yield calculations account for material lost to timepoint analyses (For example: Entry 1, 2.8 mM DMF = 300  $\mu$ L, removed 60  $\mu$ L for analyses, theoretical yield of product: 7.30 mg (reduced from 9.16 mg)).

#### Sample Entry (A):

**Entry 4.** From thioacid G-CSF 74–125 **12** (5.0 mg, 0.83  $\mu$ mol, 1 equiv), *N*-terminal amine nucleophile G-CSF 126–174 **13** (6.6 mg, 1.24  $\mu$ mol, 1.5 equiv), and HOBt (1.3 mg, 8.3  $\mu$ mol, 10 equiv) in DMF (600  $\mu$ L) at RT for 72h. Crude material (containing excess **13**, product **14**, carboxylic acid **15** and piperidide **16**) was dissolved as described and purified by HPLC (Higgins Analytical PROTO 300 5  $\mu$ M, C4 250  $\times$  4.6 mm, 40% to 95% solvent B over 30 min, flow = 0.8 mL/min). Product **14** (1.3 mg, 16%) elutes at 15.3 min and the carboxylic acid **15** (0.6 mg, 13%) elutes at 20.8 min followed by an impure mixture (0.8 mg) containing piperidide **16**.

#### Sample Entry (B):

**Entry 5.** From thioacid G-CSF 74–125 **12** (5.0 mg, 0.83  $\mu$ mol, 1 equiv), *N*-terminal amine nucleophile G-CSF 126–174 **13** (6.6 mg, 1.24  $\mu$ mol, 1.5 equiv), and HOBt (1.3 mg, 8.3  $\mu$ mol, 10 equiv) in DMA (150  $\mu$ L) at RT for 72h. Crude material (containing excess **13**, product **14**, carboxylic acid **15** and piperidide **16**) was dissolved as described and purified by HPLC (Higgins Analytical PROTO 300 5  $\mu$ M, C4 250  $\times$  4.6 mm, 40% to 95% solvent B over 30 min, flow = 0.8 mL/min). Product **14** (1.0 mg, 18%) elutes at 15.3 min and the carboxylic acid **15** (0.6 mg, 20%) elutes at 20.8 min followed by an impure mixture (0.7 mg) containing piperidide **16**.

For crude reaction analysis, see **Figure 1.13A**, **Figure 1.13B**, and **Figure 1.13C**.

For graphical representation of timepoint analyses, see **Figure 1.14A**, **Figure 1.14B** and **Figure 1.14C**.

For sample purification of **14** from crude reaction mixture, see **Figure 1.15**.

#### Sequence (14):

H-C(S*t*-Bu)<sub>2</sub>LSQLHSGLFLYQGLLQALEGISPELGPTLDTLQLDVADFATTIWQQMEELG—MAPALQPTQGAMPAFASAFQ  
RRAGGVLVASHLQSFLEVSYRVLRLHAQP-(OH)

**Chemical Formula:** C<sub>498</sub>H<sub>783</sub>N<sub>131</sub>O<sub>143</sub>S<sub>5</sub>

**Molecular Weight (g / mol):** 11,053.82

**See Figure 1.16A, Figure 1.16B and Figure 1.14C** ESI-MS (+) of peptide **14**.  $M = C_{498}H_{783}N_{131}O_{143}S_5$ . ESI calculated for  $[M+6H^+]^{6+}$   $m/z$ : 1843.31, found: 1842.97;  $[M+7H^+]^{7+}$   $m/z$ : 1580.12, found: 1579.72;  $[M+8H^+]^{8+}$   $m/z$ : 1382.74, found: 1382.45;  $[M+9H^+]^{9+}$   $m/z$ : 1229.21, found: 1228.98;  $[M+10H^+]^{10+}$   $m/z$ : 1106.39, found: 1106.28;  $[M+11H^+]^{11+}$   $m/z$ : 1005.90, found: 1005.92;  $[M+12H^+]^{12+}$   $m/z$ : 922.16, found: 921.85;  $[M+13H^+]^{13+}$   $m/z$ : 851.30, found: 850.97;  $[M+14H^+]^{14+}$   $m/z$ : 790.57, found: 790.38;  $[M+15H^+]^{15+}$   $m/z$ : 737.93, found: 737.80.

**Sequence (15):**

H-C(S*t*-Bu)LSQLHSGLFLYQGLLQALEGISPELGPTLDTLQLDVADFATTIWQQMEELG-(OH)

**Chemical Formula:**  $C_{261}H_{409}N_{61}O_{81}S_3$

**Molecular Weight (g / mol):** 5,793.67

**See Figure 1.17A and Figure 1.17B** ESI-MS (+) of peptide **15**.  $M = C_{261}H_{409}N_{61}O_{81}S_3$ . ESI calculated for  $[M+3H^+]^{5+}$   $m/z$ : 1932.23, found: 1923.05;  $[M+4H^+]^{5+}$   $m/z$ : 1449.43, found: 1449.28;  $[M+5H^+]^{5+}$   $m/z$ : 1159.74, found: 1159.60.

**Sequence (16):**

H-C(S*t*-Bu)LSQLHSGLFLYQGLLQALEGISPELGPTLDTLQLDVADFATTIWQQMEELG-(piperidine)

**Chemical Formula:**  $C_{266}H_{418}N_{62}O_{80}S_3$

**Molecular Weight (g / mol):** 5,860.80

**See Figure 1.13A and Figure 1.13B Top:** Product identified as piperide (**16**) at 3.94 min, found  $[M+3H^+]^{3+}$ ,  $[M+4H^+]^{5+}$ ,  $[M+5H^+]^{5+}$ .

**Synthesis of G-CSF 1–174 (22).**

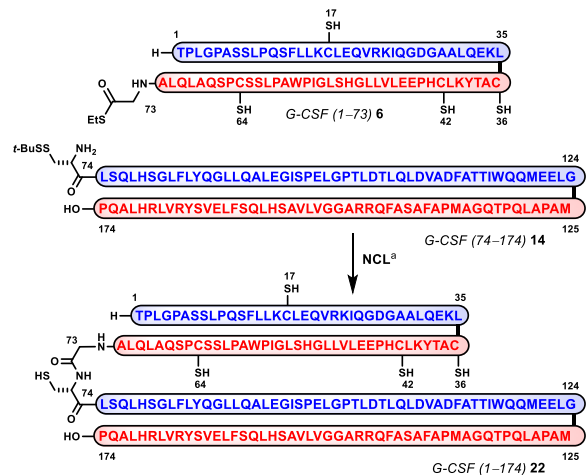

**Sequence (22):**

H-TPLGPASSLPQSFLKCLEQVRKIQGDGAALQEKLCA<sup>1</sup>TYKLCHPEELVLLGHSLGIPWAPLSS  
 CPSQALQLAG—CLSQLHSGLFLYQGLLQALEGISPELGPTLDTLQLDVADFATTIWQQMEELGM  
 APALQPTQGAMPAFASAFQRRAGGVLVASHLQSFLEVS<sup>2</sup>YRVLRLHLAQP-(OH)

**Chemical Formula:**  $C_{840}H_{1334}N_{222}O_{242}S_8$

**Molecular Weight (g / mol):** 18,671.4735

To a pre-weighed mixture of G-CSF 1–73 **6** (2.4 mg, 0.31  $\mu$ mol, 1.7 equiv) and G-CSF 74–174 **14** (2.0 mg, 0.18  $\mu$ mol, 1 equiv) in a conical vial with a stir bar was added modified native chemical ligation buffer (200  $\mu$ L, pH = 6.8). (Modified Buffer: Same as general procedure with 2  $\times$  TCEP quantity (21.6 mg TCEP, 0.08 mmol, total volume 2-mL)) The vial was



flushed with Ar, capped and stirred at RT for 18h until judged complete by UPLC-MS analysis indicating consumption of **14**. Sample aliquot preparation: (t = 18h, 10  $\mu$ L reaction diluted with neutral TCEP solution (0.5 M, 10  $\mu$ L), inject 10  $\mu$ L). The reaction was protected from oxidation by dilution with neutral TCEP solution (0.5 M, 20  $\mu$ L) and purified from the modified native chemical ligation buffer at 22h by direct injection (2  $\times$   $\sim$ 100  $\mu$ L) onto semi-preparative HPLC (Higgins Analytical PROTO 300 5  $\mu$ M, C4 250  $\times$  4.6 mm, 40% to 95% solvent B over 30 min, flow = 0.8 mL/min). Product **22** eluted from 16.0 to 21.0 min. All fractions were reanalyzed by UPLC-MS and fractions containing pure **22** (17.0 to 20.5 min) were pooled, shell frozen and lyophilized to yield **22** (550  $\mu$ g, 16%) as a white powder.

For LC-MS trace and MS analysis of **22**, see **Figure 1.18A** and **Figure 1.18B**.

For HRMS analysis and tabulation of MS data for **22**, see **Figure 1.26** and **Figure 1.28**.

The conversion of purified **6** and **14** to G-CSF 1–174 **22** was conducted several times (Entry 1: isolated **22**: 650  $\mu$ g lyophilized weight, 19% from 0.181  $\mu$ mol scale). Precipitation from ligation buffer was a common occurrence. The two step procedure involving direct precipitation of crude G-CSF 1–174 **22** and direct folding to afford folded G-CSF 1–174 **2a** addressed this issue (see below).

#### **Synthesis of G-CSF 1–174 Aglycone (2a).**

##### **Sequence (2a) (Cys36Cys42, Cys64Cys74):**

H-TPLGPASSLPQSFLKCLEQVRKIQGDGAALQEKLKCATYKLCHEPELVLLGHSLGIPWAPLSS  
CPSQALQLAGCLSQLHSGFLYQGLLQALEGISPELGPTLDTLQLDVADFATTIWQQMEELGM  
APALQPTQGAMPAFASAFQRRAGGVLVASHLQSFLEVSYRVLRLHAQP-(OH)

**Chemical Formula:** C<sub>840</sub>H<sub>1330</sub>N<sub>222</sub>O<sub>242</sub>S<sub>8</sub>

**Molecular Weight (g / mol):** 18,667.4418

To a pre-weighed mixture of G-CSF 1–73 **6** (3.0 mg, 0.38  $\mu$ mol, 1.5 equiv) and G-CSF 74–174 **14** (2.8 mg, 0.25  $\mu$ mol, 1 equiv) in a conical vial with a stir bar was added modified native chemical ligation buffer (300  $\mu$ L, pH = 6.8). (Modified Buffer: Same as general procedure with 2  $\times$  TCEP quantity (21.6 mg TCEP, 0.08 mmol, total volume 2-mL)) The vial was flushed with Ar, capped and stirred at RT for 20h until judged complete by UPLC-MS analysis indicating consumption of **14**. Sample aliquot preparation: (t = 17h, 10  $\mu$ L reaction diluted with neutral TCEP solution (0.5 M, 10  $\mu$ L), inject 10  $\mu$ L). The reaction was diluted at 20h with neutral TCEP solution (0.5 M, 100  $\mu$ L) followed by the addition of ice cold degassed H<sub>2</sub>O (1000  $\mu$ L) to induce precipitation of the desired crude product **22**. The vial was cooled in an ice-water bath for 5 min followed by centrifugation and decantation (repeated 3  $\times$  1000  $\mu$ L with cold H<sub>2</sub>O). The final pellet was shell frozen and lyophilized to yield crude G-CSF **22** (assumed 0.25  $\mu$ mol) as a white solid.

The crude material **22** (assumed 0.25  $\mu$ mol) was suspended in buffer-1 (900  $\mu$ L) and stirred for 30 min in a preheated oil bath at 25  $^{\circ}$ C. At this point, buffer-2 (90  $\mu$ L) was added and the now homogeneous mixture was stirred loosely capped at 25  $^{\circ}$ C for 20h.<sup>[8]</sup> The reaction was cooled to RT and purified directly by semi-preparative HPLC (Higgins Analytical PROTO 300 5  $\mu$ M, C4 250  $\times$  4.6 mm, 40% to 95% solvent B over 30 min, flow = 0.5 mL/min). The batch was purified in eight injections (8  $\times$   $\sim$ 100  $\mu$ L crude). Product **2a** eluted from 33.0 to 35.0 min. All fractions were reanalyzed by UPLC-MS and pure fractions were pooled ( $\sim$ 8 mL total volume, estimated at 75% solvent B). The combined fractions were diluted with H<sub>2</sub>O (12 mL) containing HOAc (40  $\mu$ L) and concentrated using 10,000 MWCO Amicon centrifugation filters at 3000 rpm, 15  $^{\circ}$ C (3  $\times$  10 min cycles, with re-dilution each cycle). The combined solution was reduced to total volume of 1500  $\mu$ L and re-

diluted with buffer-3 (2 mL). This diluted solution was concentrated using 10,000 MWCO Amicon centrifugation filters at 3000 rpm, 15 °C (3 × 10 min cycles, with re-dilution each cycle). The combined solution was reduced to total volume of 3750 µL buffer-3. The concentration of this solution was determined to be 92 µg/mL **2a** (calc. 345 µg, 7%, 2 steps) by UV-peak integration following UPLC-MS analysis relative to an internal standard.<sup>[7]</sup> Concentration analysis by Bradford protein assay determined sample **2a** to be 80 µg/mL (calc. 300 µg, 6%, 2 steps).<sup>[9]</sup> This concentration (80 µg/mL) was used in all subsequent experiments.

**Buffer 1:** Take 1000 µL of TRIS•HCl solution (1 M, pH = 8.0) and sodium lauroyl sarcosinate (400 mg) and dilute to 20 mL with degassed H<sub>2</sub>O to make a 50 mM TRIS•HCl buffer containing 2 wt% sarkosyl.

**Buffer 2:** Take 10 mL of the above 'Buffer-1' and add CuSO<sub>4</sub> pentahydrate (1.0 mg) to make a 400 µM CuSO<sub>4</sub> solution.

**Buffer 3:** A 1-L solution was prepared by dissolution of D-sorbitol (50 g) and NaOAc (820 mg) in pyrogen-free H<sub>2</sub>O (945 mL) The pH was adjusted by the addition of glacial HOAc (300 µL, to pH = 4.6). A solution of Tween-20 (60 mg dispersed in 5 mL pyrogen-free H<sub>2</sub>O) was added and the solution was thoroughly mixed. The solution was allowed to rest for 12h.

**Sequence (2a) (Cys36Cys42, Cys64Cys74):**

**Chemical Formula:** C<sub>840</sub>H<sub>1330</sub>N<sub>222</sub>O<sub>242</sub>S<sub>8</sub>

**Molecular Weight (g / mol):** 18,667.4418

Alternatively, G-CSF **2a** could be prepared from HPLC purified and lyophilized material G-CSF **22** in a similar manner. Spectroscopic characterization data, biological activity and recovery of G-CSF **2a** in this way (2 steps, 2 purifications) were comparable to the one-step protocol described. The conversion of purified **22** to folded **2a** was conducted several times (Entry 1: isolated **2a**: 180 µg lyophilized weight, 28% from 0.034 µmol scale).

For crude reaction analysis, folding of **22** to provide **2a** see **Figure 1.19A, Figure 1.19B and Figure 1.19C**.

For low resolution MS analysis of **22** and **2a**, see **Figure 1.20A and Figure 1.20B**.

For LC-MS data of standard recombinant G-CSF **2b** see **Figure 1.21A**.

For LC-MS data comparing recombinant G-CSF **2b** with crude G-CSF **2a** and sample purification, see **Figure 1.21B**.

For LC-MS data comparing recombinant G-CSF **2b** with crude G-CSF **2a** and purified G-CSF **2a**, see **Figure 1.21C**.

For UV analysis from purification of G-CSF **2a**, see **Figure 1.22 and Figure 1.23**.

For UPLC-MS analysis of purified G-CSF **2a**, see **Figure 1.24A**.

For UPLC-MS analysis comparing **22** and G-CSF **2a**, see **Figure 1.24B**.

For LC-MS analysis comparing **22** and G-CSF **2a**, see **Figure 1.25**.

For HRMS analysis and tabulation of MS data for G-CSF **2a**, see **Figure 1.27 and Figure 1.28**.

## Part IV. Synthesis of G-CSF 126–174 (13) and Glycopeptide G-CSF 126–174 (21).

### Preparation of G-CSF 126–149 (17).

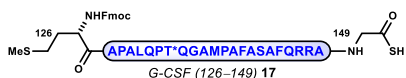

#### Sequence (17):

Fmoc-MAPALQPTQGAMPAPAFASAFQRRAG-(SH)

**Chemical Formula:** C<sub>123</sub>H<sub>181</sub>N<sub>33</sub>O<sub>31</sub>S<sub>3</sub>

**Molecular Weight (g / mol):** 2,714.18

Following the general procedure for Fmoc-based SPPS on an Applied Biosystems Pioneer with deblock 4:1 DMF/piperidine containing 0.1 M Oxyma Pure, peptide (G-CSF 126-148) was prepared on 0.1 mmol scale from Fmoc-Ala-NovaSyn® TGT resin (residue 148), Fmoc-Ala-Ser(Ψ<sup>Me,Me</sup>Pro)-OH (residues 154-155, 141-142) and Fmoc-Met-OH (residue 126). The peptide resin was subjected to mild cleavage protocol.

After lyophilization, the resultant fully protected peptide (assumed 0.08 mmol by mass recovered, G-CSF 126-148) was dissolved in chloroform (3 mL) and cooled to 0 °C with an ice-water bath. To the solution was added **11** (90 mg, 3 equiv), HOObt (39.4 mg, 3 equiv) and EDC (44 μL, 3 equiv). The resultant yellow solution was stirred for 3 h at 0 °C, allowed to reach RT, stirred at RT for 12h, diluted with 5 vol % HOAc in chloroform (20 mL) and washed with H<sub>2</sub>O (2 × 5 mL). The organic layer was washed with a saturated aqueous brine solution (5 mL), dried over Na<sub>2</sub>SO<sub>4</sub>, filtered and concentrated en vacuo to yield fully protected (G-CSF 126-149) as a crude yellow oil. The oil was diluted with HOAc (2 mL) and precipitated with H<sub>2</sub>O (60 mL). The resultant precipitous solution was shell-frozen and lyophilized. The resultant powder was treated with a modified cocktail B (6 mL, 2 h, twice) following the general procedure (Modified Cocktail B, water removed and solution is diluted: 200 mg phenol dissolved in methylene chloride (12 mL) and TFA (12 mL), add 600 μL *i*-Pr<sub>3</sub>SiH). The obtained crude pellet was dissolved in H<sub>2</sub>O/CH<sub>3</sub>CN (1:1, 0.05% TFA) and purified by HPLC (Microsorb 300-5 C4 column, 30% to 70% solvent B over 30 min). Product **17** eluted at 16.0 min. Lyophilization of the collected fractions provided peptide **17** (24 mg, 9%) as a white solid.

**See Figure 1.29A and Figure 1.29B** ESI-MS (+) of peptide **17**. M = C<sub>123</sub>H<sub>181</sub>N<sub>33</sub>O<sub>31</sub>S<sub>3</sub>. ESI calculated for [M×2+3H<sup>+</sup>]<sup>3+</sup> *m/z*: 1810.5, found: 1810.4; [M+2H<sup>+</sup>]<sup>2+</sup> *m/z*: 1358.1, found: 1358.0; [M+3H<sup>+</sup>]<sup>3+</sup> *m/z*: 905.7, found: 905.7.

### Preparation of G-CSF 150–174 (18).

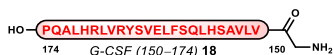

#### Sequence (18):

H-GVLVASHLQSFLEVS<sup>YR</sup>VLRHLAQP-(OH)

**Chemical Formula:** C<sub>129</sub>H<sub>207</sub>N<sub>37</sub>O<sub>34</sub>

**Molecular Weight (g / mol):** 2,820.30

Following the general procedure for microwave-assisted Fmoc-based SPPS with deblock 4:1 DMF/piperidine, peptide (G-CSF 150-174) was prepared on 0.1 mmol scale from Fmoc-Pro-NovaSyn® TGT resin (residue 174), Fmoc-Val-Ser(Ψ<sup>Me,Me</sup>Pro)-OH (residues 163-164), Fmoc-Gln(Trt)-Ser(Ψ<sup>Me,Me</sup>Pro)-OH (residues 158-159), and Fmoc-Ala-Ser(Ψ<sup>Me,Me</sup>Pro)-OH (residues 154-155). The peptide resin was subjected to mild cleavage protocol.

After lyophilization, the resultant fully protected peptide (0.1 mmol, G-CSF 136-174) was treated with cocktail B (20 mL, 2h, twice) following the general procedure. A portion (0.05 mmol) of obtained crude pellet was dissolved in H<sub>2</sub>O/CH<sub>3</sub>CN (1:1, 0.05% TFA) and purified by HPLC (Microsorb 300-5 C8 column, 40% to 65% solvent B over 30 min). Product **18** eluted at 12.0 min. Lyophilization of the collected fractions provided peptide **18** (36 mg, 26%) as a white solid.

See Figure 1.30A and Figure 1.30B ESI-MS (+) of peptide **18**. M = C<sub>129</sub>H<sub>207</sub>N<sub>37</sub>O<sub>34</sub>. ESI calculated for [M+2+3H<sup>+</sup>]<sup>3+</sup> m/z: 1881.20, found: 1881.82; [M+2H<sup>+</sup>]<sup>2+</sup> m/z: 1411.16, found: 1411.41; [M+3H<sup>+</sup>]<sup>3+</sup> m/z: 941.11, found: 941.21; [M+4H<sup>+</sup>]<sup>4+</sup> m/z: 706.08, found: 706.08.

### Synthesis of G-CSF 126–174 (**13**).

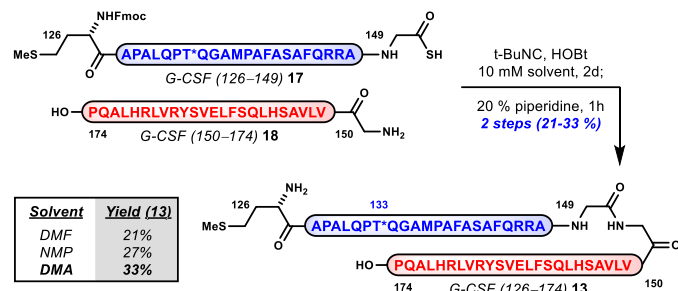

### Sequence (**13**):

H-MAPALQPTQGAMPAFASAFQRRAG—GVLVASHLQSFLEVSYRVLRHLAQP-(OH)

**Chemical Formula:** C<sub>237</sub>H<sub>376</sub>N<sub>70</sub>O<sub>63</sub>S<sub>2</sub>

**Molecular Weight (g / mol):** 5,278.16

To an oven-dried 4-mL vial was added thioacid G-CSF 126–149 **17** (5.0 mg, 1.8 μmol, 1.0 equiv), N-terminal amine **18** (7.8 mg, 2.8 μmol, 1.5 equiv), and HOBt (2.8 mg, 18.4 μmol, 10 equiv). A stir bar was added, followed by the addition of anhydrous solvent (DMF, NMP or DMA) to a final concentration of 10 mM **17** (180 μL). The mixture was stirred at RT for 5 min followed by the addition of *tert*-butyl isonitrile (5.5 μmol, 3.0 equiv) via syringe from a 100 mM stock-solution prepared in the corresponding solvent. The reactions were capped and stirred for 72h. At t = 72 h, reactions were diluted with 100 μL deblock solution (20 vol % piperidine in DMF) and stirred vigorously at RT for 1h, cooled in dry ice, followed by precipitation with 6 mL of cold diethyl ether. The precipitate was centrifuged (5 min, 5 °C, 5000 rpm) and the supernatant was decanted. The resultant pellet was frozen in liquid nitrogen and lyophilized prior to purification by semi-preparative HPLC. The crude material (containing excess **18** and product **13**) was dissolved in H<sub>2</sub>O/CH<sub>3</sub>CN (1:1, 0.05% TFA) and purified by HPLC (Microsorb 300-5 C8 column, 40% to 65% solvent B over 30 min). Product **13** elutes at 11.0 min and followed by recovered **18**.

**Entry 1** (DMF) – Isolated product **13** (2.1 mg, 21%) and recovered **18** (3.6 mg).

**Entry 2** (NMP) – Isolated product **13** (2.6 mg, 27%) and recovered **18** (1.6 mg).

**Entry 3** (DMA) – Isolated product **13** (3.2 mg, 33%) and recovered **18** (1.3 mg).

**Sequence (13):**H-MAPALQPTQGAMPAFASAFQRRAG—GVLVASHLQSFLEVS<sub>YR</sub>VLRHLAQP-(OH)**Chemical Formula:** C<sub>237</sub>H<sub>376</sub>N<sub>70</sub>O<sub>63</sub>S<sub>2</sub>**Molecular Weight (g / mol):** 5,278.16

**See Figure 1.31A and Figure 1.24B** ESI-MS (+) of peptide **13**. M = C<sub>237</sub>H<sub>376</sub>N<sub>70</sub>O<sub>63</sub>S<sub>2</sub>. ESI calculated for [M+3H<sup>+</sup>]<sup>3+</sup> *m/z*: 1760.4, found: 1760.7; [M+4H<sup>+</sup>]<sup>4+</sup> *m/z*: 1320.6, found: 1320.8; [M+5H<sup>+</sup>]<sup>5+</sup> *m/z*: 1056.6, found: 1056.8; [M+6H<sup>+</sup>]<sup>6+</sup> *m/z*: 880.7, found: 880.8; [M+7H<sup>+</sup>]<sup>7+</sup> *m/z*: 750.0, found: 750.3. \* indicates presence of TFA adduct in spectrum.

**Preparation of Glycopeptide G-CSF 126–135 Thioacid (19).**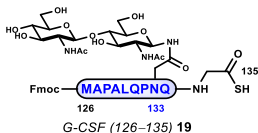**Sequence (19a)** (thiocarboxylic acid):

H-MAPALQPN(chitobiose)QG-(SH)

**Chemical Formula:** C<sub>74</sub>H<sub>107</sub>N<sub>15</sub>O<sub>25</sub>S<sub>2</sub>**Molecular Weight (g / mol):** 1,670.87**Sequence (19b)** (carboxylic acid):

H-MAPALQPN(chitobiose)QG-(OH)

**Chemical Formula:** C<sub>74</sub>H<sub>107</sub>N<sub>15</sub>O<sub>26</sub>S**Molecular Weight (g / mol):** 1,654.81Fmoc-MAPALQPD(OAll)Q-(OH)

Following the general procedure for Fmoc-based SPPS on an Applied Biosystems Pioneer with deblock 4:1 DMF/piperidine containing 0.1 M Oxyma Pure, peptide (G-CSF 126-134) was prepared on 0.19 mmol scale from Fmoc-Gln-NovaSyn® TGT resin (residue 134), Fmoc-Asp(OAll)-OH (residues 133) and Fmoc-Met-OH (residue 126). The peptide resin was subjected to mild cleavage protocol.

The lyophilized material (assumed 0.19 mmol) was dissolved in chloroform (12 mL) and cooled to 0 °C with an ice-water bath. To the solution was added **11** (106 mg, 1.5 equiv), HOObt (93 mg, 3 equiv) and EDC (101 μL, 3 equiv). The resultant yellow solution was stirred for 3 h at 0 °C, allowed to reach RT, stirred at RT for 1h, diluted with 5 vol % HOAc in chloroform (20 mL) and washed with H<sub>2</sub>O (2 × 5 mL). The organic layer was washed with a saturated aqueous brine solution (5 mL), dried over Na<sub>2</sub>SO<sub>4</sub>, filtered and concentrated en vacuo to yield fully protected (G-CSF 126-135) as a crude yellow oil. The oil was diluted with HOAc (2 mL), precipitated with H<sub>2</sub>O (60 mL), shell frozen and lyophilized.

Fmoc-MAPALQPD(OH)QG-(SCH<sub>2</sub>Ar)

After lyophilization, the resultant fully protected peptide (assumed 0.19 mmol by mass recovered, G-CSF 126-135) was dissolved in chloroform (12 mL) followed by the addition of phenyl silane (936 μL, 40 equiv) and Pd(PPh<sub>3</sub>)<sub>4</sub> (6.6 mg, 3 mol %). The light yellow reaction was stirred at RT shielded from light for 60 min until judged complete by UPLC-MS analysis of a reaction aliquot indicating complete deallylation at residue Asp133. The reaction was concentrated at RT with a stream of Ar, diluted with HOAc (1 mL) and centrifugated to remove insoluble salts by decantation. The decanted layer was precipitated with H<sub>2</sub>O (20 mL), shell frozen and lyophilized to provide G-CSF 126-135 as an off-white solid.

Fmoc-MAPALQPN(chitobiose)QG-(SCH<sub>2</sub>Ar)

The resultant lyophilized powder, G-CSF 126-135 (assumed 0.19 mmol) was dissolved in anhydrous DMSO (19 mL) followed by the addition of chitobiose amine (**S-5**, 241 mg, 3 equiv) and PyAOP (297 mg, 3 equiv).<sup>[10]</sup> The homogeneous reaction was stirred at RT for 1 min followed by the addition of *i*-Pr<sub>2</sub>NEt (100 μL, 3 equiv). The reaction was stirred for 45 min at RT at which point the reaction was judged complete by UPLC-MS analysis of the protected peptide indicating consumption of starting carboxylic acid. The material was precipitated with cold H<sub>2</sub>O (60 mL), centrifuged and the resultant pellet was redissolved in H<sub>2</sub>O/CH<sub>3</sub>CN (1:1, 0.05% TFA), shell frozen and lyophilized.

The resultant powder was treated with a modified cocktail B (12 mL, 2 h) following the general procedure (Modified Cocktail B, water removed and solution is diluted: 200 mg phenol dissolved in methylene chloride (12 mL) and TFA (12 mL), add 600 μL *i*-Pr<sub>3</sub>SiH). The obtained crude pellet was dissolved in H<sub>2</sub>O/CH<sub>3</sub>CN (1:1, 0.05% TFA) and purified by HPLC (Microsorb 300-5 C8 column, 10% to 60% solvent B over 30 min). Product **19** eluted at 13.0 min. Lyophilization of the collected fractions provided peptide **19** (67 mg, 21%, 3:1 **19a**:**19b**) as a white solid.

Desired glycopeptide **19a** was isolated and characterized as a presumed 3:1 mixture with its corresponding carboxylic acid **19b** (relative integration of UV-trace for peaks corresponding to **19a** and **19b**). This hydrolysis presumably occurs during HPLC purification and prolonged storage of crude **19** in aqueous solution. This mixture was used without further purification in subsequent isonitrile-mediated ligations at RT. Subsequent yields are provided based upon this ratio (3:1) as well as total mass-based yield in parentheses (See **Figure 1.32D**)

**See Figure 1.32A, Figure 1.32A, Figure 1.32A and Figure 1.32D Top:** ESI-MS (+) of peptide **19b**. M = C<sub>74</sub>H<sub>107</sub>N<sub>15</sub>O<sub>26</sub>S<sub>1</sub>. ESI calculated for [M+H<sup>+</sup>]<sup>1+</sup> *m/z*: 1655.82, found: 1656.24; [M+2H<sup>+</sup>]<sup>2+</sup> *m/z*: 828.41, found: 828.62. **Bottom:** ESI-MS (+) of peptide **19a**. M = C<sub>74</sub>H<sub>107</sub>N<sub>15</sub>O<sub>25</sub>S<sub>2</sub>. ESI calculated for [M+H<sup>+</sup>]<sup>1+</sup> *m/z*: 1671.88, found: 1672.45; [M+2H<sup>+</sup>]<sup>2+</sup> *m/z*: 836.44, found: 836.66.

#### Preparation of G-CSF 136–174 (**20**).

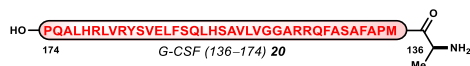

#### Sequence (**20**):

H-AMPAFASAFQRRAGGVLVASHLQSFLEVSYRVLRLHLAQP-(OH)

**Chemical Formula:** C<sub>194</sub>H<sub>306</sub>N<sub>58</sub>O<sub>50</sub>S

**Molecular Weight (g / mol):** 4,282.99

Following the general procedure for microwave-assisted Fmoc-based SPPS with deblock 4:1 DMF/piperidine, peptide (G-CSF 126-174) was prepared on 0.1 mmol scale from Fmoc-Pro-NovaSyn® TGT resin (residue 174), Fmoc-Val-Ser(Ψ<sup>Me,Me</sup>Pro)-OH (residues 163-164), Fmoc-Gln(Trt)-Ser(Ψ<sup>Me,Me</sup>Pro)-OH (residues 158-159), and Fmoc-Ala-Ser(Ψ<sup>Me,Me</sup>Pro)-OH (residues 154-155, 141-142). The peptide resin was subjected to mild cleavage protocol.

After lyophilization, the resultant fully protected peptide (0.1 mmol, G-CSF 136-174) was treated with cocktail B (20 mL, 2h, twice) following the general procedure. A portion of obtained crude pellet (0.05 mmol) was dissolved in H<sub>2</sub>O/CH<sub>3</sub>CN (1:1, 0.05% TFA) and purified by HPLC (Microsorb 300-5 C8 column, 40% to 65% solvent B over 30 min). Product **20** eluted at 11.0 min. Lyophilization of the collected fractions provided peptide **20** (81 mg, 38%) as a white solid.

See Figure 1.33A and Figure 1.33B ESI-MS (+) of peptide **20**.  $M = C_{194}H_{306}N_{58}O_{50}S$ . ESI calculated for  $[M+3H^+]^{3+}$   $m/z$ : 1428.67, found: 1428.21;  $[M+4H^+]^{4+}$   $m/z$ : 1071.76, found: 1072.16;  $[M+5H^+]^{5+}$   $m/z$ : 857.61, found: 857.99;  $[M+6H^+]^{6+}$   $m/z$ : 714.84, found: 715.12.

### Synthesis of Glycopeptide G-CSF 126–174 (13).

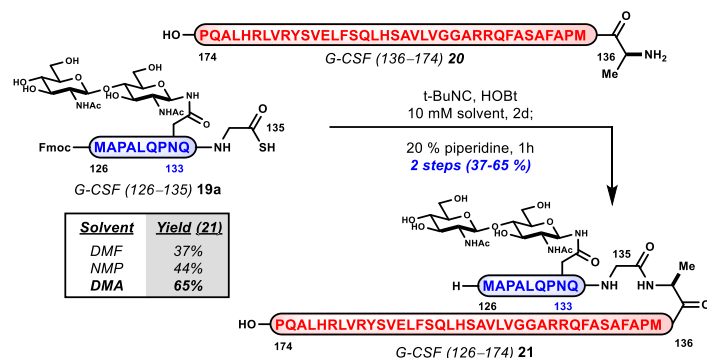

### Sequence (**21**):

H-MAPALQPN(chitobiose)QG—AMPAFASAFQRRAGGVLVASHLQSFLEVSRYRVLRLHLAQP-(OH)

**Chemical Formula:**  $C_{253}H_{401}N_{73}O_{73}S_2$

**Molecular Weight (g / mol):** 5697.55

To an oven-dried vial was added thioacid G-CSF 126–135 **19** (10.0 mg, 6.0  $\mu$ mol, 1.0 equiv), N-terminal amine **20** (38.4 mg, 9.0  $\mu$ mol, 1.5 equiv), and HOBt (9.2 mg, 59.9  $\mu$ mol, 10 equiv). A stir bar was added, followed by the addition of anhydrous DMF to a final concentration of 10 mM **19** (600  $\mu$ L). The heterogeneous mixture was stirred at RT for 5 min followed by the addition of *tert*-butyl isonitrile via syringe from a 100 mM stock-solution prepared in the corresponding solvent (17.9  $\mu$ mol, 3.0 equiv). The reactions was capped and stirred for 48h. At  $t = 48$  h, the reaction was diluted with deblock solution (20 vol % piperidine in DMF, 1 mL) and stirred vigorously at RT for 1h, cooled in dry ice, followed by precipitation with cold diethyl ether. The precipitate was centrifugated (5 min, 5  $^{\circ}$ C, 5000 rpm) and the supernatant was decanted. The resultant pellet was frozen in liquid nitrogen and lyophilized prior to purification by semi-preparative HPLC. The crude material (containing excess **20** and product **21**, see Figure 1.34A and Figure 1.34B) was dissolved in  $H_2O/CH_3CN$  (1:1, 0.05% TFA) and purified by HPLC (Microsorb 300-5 C18 column, 20% to 70% solvent B over 30 min). Product **21** elutes first at 21.0 min and partially co-elutes with recovered **20** (22 to 24 min, 4.4 mg mixed). Desired fractions were pooled and lyophilized to yield **21** (9.4 mg, 37%\* (28%), steps) as a white powder.

See Figure 1.35A and Figure 1.35B ESI-MS (+) of peptide **21**.  $M = C_{253}H_{401}N_{73}O_{73}S_2$ . ESI calculated for  $[M+3H^+]^{3+}$   $m/z$ : 1900.19, found: 1900.34;  $[M+4H^+]^{4+}$   $m/z$ : 1425.40, found: 1425.65;  $[M+5H^+]^{5+}$   $m/z$ : 1140.52, found: 1140.55;  $[M+6H^+]^{6+}$   $m/z$ : 950.60, found: 950.87;  $[M+7H^+]^{7+}$   $m/z$ : 814.94, found: 815.20.

**Entry 1** (12.5 mM **19** in DMF, 3  $\mu$ mol scale) – Isolated product **21** (5.6 mg, 44%\* (33%)), recovered **20** (11.7 mg).

**Entry 2** (12.5 mM **19** in NMP, 3  $\mu$ mol scale) – Isolated product **21** (5.6 mg, 44%\* (33%)), recovered **20** (6.0 mg).

**Entry 3** (12.5 mM **19** in DMA, 3  $\mu$ mol scale) – Isolated product **21** (8.3 mg, 65%\* (49%)), recovered **20** (6.0 mg).

**Large scale (1)** (10 mM **19** in DMF, 6  $\mu$ mol scale) – Isolated product **21** (9.4 mg, 37%\* (28%)).

**Large scale (2)** (10 mM **19** in DMA, 12  $\mu$ mol scale) – Isolated product **21** (25.0 mg, 49%\* (37%)), recovered **20** (26.0 mg).

\* Calculation based on the presumed mixture of **19** (**19a**:**19b**, 3:1) as described in the above preparation.

## Part V. Preparation of Thioesters (**11**, **S-1**, **S-2**, **S-3**) and Chitobiose Derivatives (**S-4**, **S-5**).

### Preparation of Gly Thioester Trifluoroacetate (**11**).

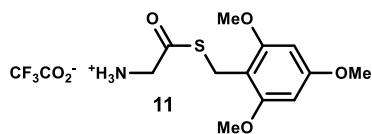

**Chemical Formula** (freebase):  $\text{C}_{12}\text{H}_{17}\text{NO}_4\text{S}$

**Molecular Weight** (g / mol): 271.33

To a solution containing Boc-Gly-OH (339 mg, 1.94 mmol, 1 equiv) and HBTU (736 mg, 1.94 mmol, 1 equiv) dissolved in acetonitrile (5.9 mL) was added *i*-Pr<sub>2</sub>NEt (0.78 mL, 4.46 mmol, 2.3 equiv). The light yellow solution was stirred for 2 min at RT followed by the addition of (2,4,6-trimethoxyphenyl)methanethiol (500 mg, 2.33 mmol, 1.2 equiv). The reaction was stirred at RT until judged complete by TLC analysis. The solution was concentrated en vacuo onto 7 g Celite and purified on a 40 g SiO<sub>2</sub> flash chromatography cartridge. The product was eluted with a stepwise gradient of hexanes/ethyl acetate (hexanes, 100%, 2 CV → hexanes/ethyl acetate, 9:1, 3 CV → hexanes/ethyl acetate, 7:3, 9 CV). The desired eluted during hexanes/ethyl acetate, 7:3, 9 CV and has  $R_f = 0.4$  (hexanes/ethyl acetate, 7:3), stains with KMnO<sub>4</sub> solution. Desired fractions were combined and concentrated to provide the corresponding Boc-protected thioester as a white solid. This material (700 mg) was dissolved in methylene chloride (14 mL) and treated with TFA (5.5 mL) for 15 min at RT. Analysis by UPLC-MS indicates complete Boc- removal. The reaction was concentrated en vacuo, redissolved in H<sub>2</sub>O/CH<sub>3</sub>CN (7:3, 0.05% TFA), shell frozen and lyophilized to provide pure **11** (746 mg, 97%) as a white solid.

**See Figure 1.36A** <sup>1</sup>H NMR (600 MHz, D<sub>2</sub>O): 6.28 (s, 2H), 4.28 (s, 2H), 4.14 (s, 2H), 3.83 (s, 9H).

**See Figure 1.36B** <sup>1</sup>H NMR (600 MHz, 6:1 CDCl<sub>3</sub> / DMSO-*d*<sub>6</sub>): 7.24 (s, 2H), 5.45 (s, 2H), 5.12 (s, 2H), 4.95 (s, 3H), 4.93 (s, 6H).

**See Figure 1.36C** <sup>13</sup>C NMR (150 MHz, 6:1 CDCl<sub>3</sub> / DMSO-*d*<sub>6</sub>): 193.4, 161.0, 158.9, 103.0, 90.2, 55.5, 55.1, 46.8, 22.1.

**LRMS** (ESI): calculated for  $M = \text{C}_{12}\text{H}_{17}\text{NO}_4\text{S}$ ,  $[\text{M}+\text{H}]^+$ : 272.3, found: 272.2.

### Preparation of Leu Thioester Hydrochloride (**S-1**) and Gly Thioester Hydrochloride (**S-2**).

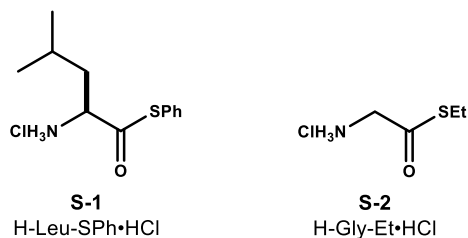

Leu Thioester Hydrochloride (**S-1**) and Gly Thioester Hydrochloride (**S-2**) were prepared from Boc-Leu-OH and thiophenol and Boc-Gly-OH and ethane thiol respectively according to Stuhr-Hansen *et al.*<sup>[5b]</sup> The corresponding Boc-protected derivatives were treated in methylene chloride with 4 M HCl in 1,4-dioxane at RT followed by concentration, dilution of the incipient residues H<sub>2</sub>O/CH<sub>3</sub>CN (7:3, 0.05% TFA), shell frozen and lyophilized to provide **S-1** and **S-2** of suitable purity for subsequent reactions.



### Leu Thioester Hydrochloride (S-1).

**Chemical Formula** (freebase): C<sub>12</sub>H<sub>17</sub>NOS

**Molecular Weight (g / mol):** 223.33

**See Figure 1.37A <sup>1</sup>H NMR** (600 MHz, D<sub>2</sub>O): 7.62-7.54 (m, 1H), 4.54-4.48 (m, 1H), 2.04-1.97 (m, 2H), 1.06 (d, *J* = 6.3 Hz, 3H), 1.02 (d, *J* = 6.3 Hz, 3H).

**See Figure 1.37B <sup>13</sup>C NMR** (150 MHz, D<sub>2</sub>O): 199.0, 134.8, 130.9, 130.0, 124.5, 57.4, 40.1, 24.1, 21.8, 20.8.

**LRMS** (ESI): calculated for M = C<sub>12</sub>H<sub>17</sub>NOS, [M+H<sup>+</sup>]<sup>+</sup>: 224.34, found: 224.30.

### Gly Thioester Hydrochloride (S-2).

**Chemical Formula** (freebase): C<sub>4</sub>H<sub>9</sub>NOS

**Molecular Weight (g / mol):** 119.18

**See Figure 1.38A <sup>1</sup>H NMR** (600 MHz, D<sub>2</sub>O): 4.17 (s, 2H), 3.05 (q, *J* = 7.4 Hz, 2H), 1.29 (t, *J* = 7.4 Hz, 3H).

**See Figure 1.38B <sup>13</sup>C NMR** (150 MHz, D<sub>2</sub>O): 195.4, 47.0, 23.5, 13.7.

**LRMS** (ESI): calculated for M = C<sub>4</sub>H<sub>9</sub>NOS, [M+H<sup>+</sup>]<sup>+</sup>: 120.19, found: 120.10.

### Preparation of Met Thioester Hydrochloride (S-3).

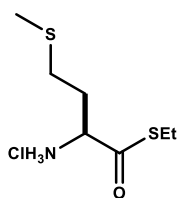

**S-3**

H-Met-SEt·HCl

**Chemical Formula** (freebase): C<sub>7</sub>H<sub>15</sub>NOS<sub>2</sub>

**Molecular Weight (g / mol):** 193.32

To a suspension containing Boc-Met-OH (1.56 g, 1 equiv) and HOBt (2.50 g, 1 equiv) in methylene chloride (32 mL) was added EDC (1.12 mL, 1 equiv). The heterogeneous reaction was stirred at RT for 5 min followed by the addition of ethane thiol (0.93 mL, 2.0 equiv). The reaction becomes homogeneous and light yellow. The reaction was stirred at RT for 12h, concentrated onto Celite and purified on a 80 g SiO<sub>2</sub> flash chromatography cartridge. The product was eluted with a stepwise gradient of hexanes/ethyl acetate (hexanes, 100%, 2 CV → hexanes/ethyl acetate, 9:1, 2 CV → hexanes/ethyl acetate, 7:3, 5 CV). The desired eluted during hexanes/ethyl acetate, 7:3, 5 CV and has R<sub>f</sub> = 0.6 (hexanes/ethyl acetate, 7:3), stains with KMnO<sub>4</sub> solution. Desired fractions were combined and concentrated to provide the corresponding Boc-protected thioester as a white solid. This material (904 mg) was dissolved in methylene chloride (1.7 mL), cooled in an ice water bath and treated with 4.0 M HCl in 1,4-dioxane (1.7 mL) for 30 min at 0 °C and 60 min at RT. Analysis by UPLC-MS indicates complete Boc- removal. The reaction was concentrated en vacuo, redissolved in H<sub>2</sub>O/CH<sub>3</sub>CN (7:3, 0.05% TFA), shell frozen and lyophilized to provide pure **S-3** (640 mg, 45%) as an off-white solid.

**See Figure 1.39A <sup>1</sup>H NMR** (500 MHz, D<sub>2</sub>O): 4.50-4.44 (m, 1H), 3.12-2.97 (m, 2H), 2.73-2.66 (m, 2H), 2.38-2.17 (m, 2H), 2.15 (s, 3H), 1.32-1.25 (m, 3H).

**See Figure 1.39B <sup>13</sup>C NMR** (125 MHz, D<sub>2</sub>O): 198.4, 58.0, 30.1, 28.2, 23.8, 13.9, 13.5.

**LRMS** (ESI): calculated for M = C<sub>7</sub>H<sub>15</sub>NOS<sub>2</sub>, [M+H<sup>+</sup>]<sup>+</sup>: 194.32, found: 194.20.

### Preparation of Chitobiose Octaacetate (**S-4**).

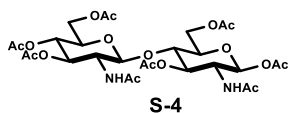

**Chemical Formula:** C<sub>28</sub>H<sub>40</sub>N<sub>2</sub>O<sub>17</sub>

**Molecular Weight (g / mol):** 676.63

Chitobiose octaacetate was prepared with minor modifications to the reported procedure.<sup>[11]</sup> Chitin (10g, coarse flakes from shrimp shells) was suspended in 73-mL conc. HCl in a 1-L Erlenmeyer flask. The resultant light brown viscous solution was sonicated at 30 °C for 90 min followed by the addition of ice (300 g) and ice cold H<sub>2</sub>O (500 mL) to provide a momentarily clear solution. After 2-5 min, the solution precipitates a white powder. The precipitous solution was stored overnight at 4 °C. This procedure was repeated with another batch of chitin (10 g) and the combined precipitates were isolated by vacuum filtration, washed with 1 M aqueous NaOH (40 mL) and H<sub>2</sub>O. The resultant white powder was suspended in H<sub>2</sub>O (100 mL), shell frozen and lyophilized to provide 14.6 g of crude chitin after acidic treatment.

A portion of this material (6.3 g) was suspended in phosphate buffer (0.1 M Na<sub>2</sub>HPO<sub>4</sub>, pH = 6.5) and the final pH was adjusted to pH = 6.4 with 6 M HCl. The reaction was heated in a 37 °C oil bath followed by the immediate addition of 30 mg chitinase (539 units/mg, ~16 units). After stirring at 37 °C for 15 days (reaction progress can be monitored by crude aliquots analyzed by <sup>1</sup>H NMR in D<sub>2</sub>O). The crude reaction was cooled to RT, filtered, shell-frozen and lyophilized to provide 7.06 g of chitobiose.

A portion of this material (6.39 g) and NaOAc (7.8 g) was suspended in neat Ac<sub>2</sub>O (72 mL) at RT. The reaction was heated in an 80 °C oil bath for 48h, cooled to RT and stirred overnight (10 h). The reaction was diluted with chloroform (250 mL) and carefully washed with saturated aqueous NaHCO<sub>3</sub> solution (2 × 20 mL) and saturated aqueous brine solution (10 mL). Layers were allowed to separate and the organic layer was dried over Na<sub>2</sub>SO<sub>4</sub>, filtered and concentrated en vacuo to provide crude **S-4** (5.70 g) as an off-white solid. The crude material was recrystallized from boiling methanol (55 mL), cooled to RT, allowed to sit at RT for 5h followed by storage at -20 °C for 48h. Filtration of recrystallized material provided **S-4** (3.1 g) as a white solid of purity suitable for subsequent reactions.

**See Figure 1.40A <sup>1</sup>H NMR** (500 MHz, CDCl<sub>3</sub>): 6.10 (d, *J* = 3.6 Hz, 1H), 5.92 (d, *J* = 8.8 Hz, 1H), 5.62 (d, *J* = 9.2 Hz, 1H), 5.22 (dd, *J* = 9.2, 11.2 Hz, 1H), 5.13 (app. t, *J* = 9.6 Hz, 1H), 5.05 (app. t, *J* = 9.6 Hz, 1H), 4.40 (m, 4H), 4.18 (dd, *J* = 1.6, 12.0 Hz, 1H), 4.02 (dd, *J* = 1.6, 12.0 Hz, 1H), 3.92 (m, 2H), 3.73 (app. t, *J* = 9.2 Hz, 1H), 3.62 (m, 1H), 2.18-1.92 (8 × s, 24H).

**See Figure 1.40B <sup>13</sup>C NMR** (125 MHz, CDCl<sub>3</sub>): 171.7, 171.5, 171.0, 170.7, 170.6, 170.3, 169.5, 169.1, 102.0, 90.7, 76.2, 72.8, 72.2, 71.0, 70.9, 68.1, 61.9, 61.6, 54.7, 51.4, 23.4, 23.3, 21.22, 21.20, 20.9, 20.8, 20.8.

### Preparation of Chitobiose Amine (**S-5**).

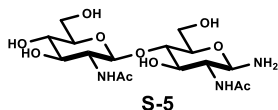

**Chemical Formula:** C<sub>16</sub>H<sub>29</sub>N<sub>3</sub>O<sub>10</sub>

**Molecular Weight (g / mol):** 423.42

Chitobiose octaacetate (**S-4**, 2.00 g, 1 equiv) was suspended in methylene chloride (32 mL) followed by the addition of 7 M NH<sub>3</sub> in methanol (96 mL).<sup>[11]</sup> The clear solution was stirred for 48h at RT, concentrated to approximately 30 mL of methanol at which point substantial precipitation occurs. The precipitous solution was diluted with ethyl acetate (10 mL) and

equally portioned as a slurry into 4 centrifugation tubes (~10 mL each, 50-mL volume tubes). The tubes were each diluted with ice cold ethyl acetate (30 mL) and centrifugated. This precipitation process was repeated and resultant pellets were recombined, dissolved in water (120mL), shell frozen and lyophilized to provide crude chitobiose (1.3 g).

The crude chitobiose (1.3 g) was dissolved in saturated aqueous  $\text{NH}_4\text{HCO}_3$  solution (prepared by dissolution of 30 g  $\text{NH}_4\text{HCO}_3$  in  $\text{H}_2\text{O}$  (25 mL)). The precipitous solution was stirred for 72h at RT, filtered through a cotton plug (washed 2 × 10 mL  $\text{H}_2\text{O}$ ) and combined filtrates were further diluted with  $\text{H}_2\text{O}$  (160 mL), shell frozen and lyophilized three times from pure  $\text{H}_2\text{O}$  until a stable mass was obtained. This procedure affords chitobiose amine (**S-5**, 1.26 g, 94%, 2 steps) as a white solid of purity suitable for subsequent reactions.

**See Figure 1.41A  $^1\text{H}$  NMR** (600 MHz,  $\text{D}_2\text{O}$ ): 4.60 (d,  $J$  = 8.5 Hz, 1H), 4.17 (d,  $J$  = 8.7 Hz, 1H), 3.98-3.48 (m, 13H), 2.09 (s, 3H), 2.06 (s, 3H).

**See Figure 1.41B  $^{13}\text{C}$  NMR** (155 MHz,  $\text{D}_2\text{O}$ ): 174.63, 174.57, 101.5, 84.1, 79.7, 75.9, 75.3, 73.4, 73.1, 69.7, 60.5, 60.3, 55.7, 55.6, 22.2, 22.1.

**LRMS** (ESI): calculated for  $\text{M} = \text{C}_{16}\text{H}_{29}\text{N}_3\text{O}_{10}$ ,  $[\text{M}+\text{H}]^+$ : 424.43, found: 424.40.

## Part VI. Characterization Data for G-CSF 1–174 (22) and G-CSF 1–174 Aglycone (2a).

### Circular Dichroism Spectra for G-CSF 1–174 Aglycone (2a).

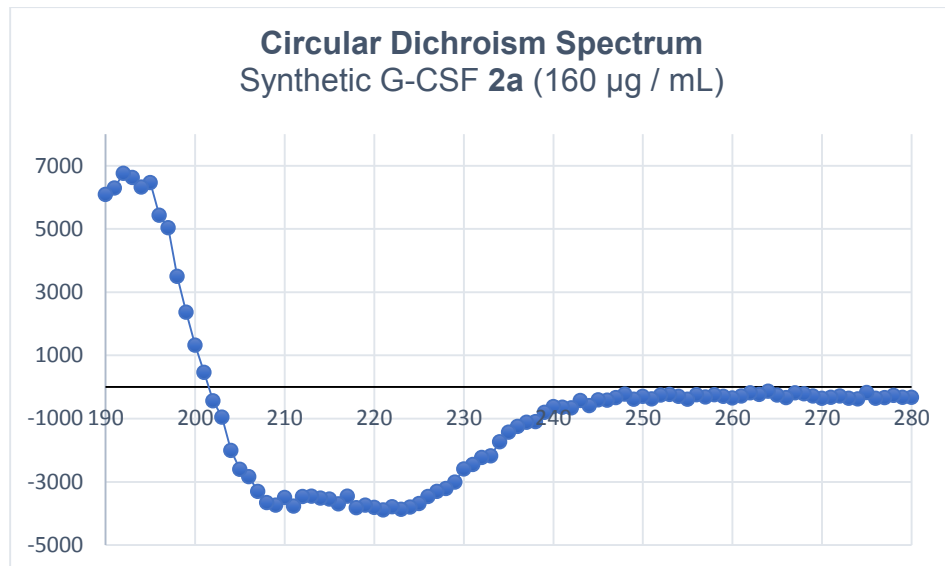

**FIGURE S-1. Circular Dichroism Spectrum for Synthetic G-CSF 1–174 (2a)** Acquired with Aviv Circular Dichroism Model 62DS. The sample is G-CSF (2a) at est. 160 µg / mL in pH = 7.0 water. Data was acquired at 25 °C and is plotted as the collected average of 3 scans. y axis =  $[\Theta]$  deg cm<sup>2</sup>/dmol, x axis =  $\lambda$  nm (190 to 280 nm)

The sample synthetic G-CSF (2a) was prepared by exchange from buffer 3 (2a, 80 µg / mL, 1000 µL) into water (2a, est. 160 µg / mL, 500 µL). The water used was pH = 7.0. Solvent exchange and concentration were made using a 10,000 MWCO Amicon centrifugation filter at 3000 rpm, 15 °C (3 × 10 min cycles, with re-dilution each cycle). The reduced signal intensity for synthetic G-CSF 2a (molar ellipticity,  $[\Theta]$ , reduced from anticipated signal of ~20,000 deg cm<sup>2</sup>/dmol) has been previously observed in reports where recombinant G-CSF and pegylated G-CSF samples aggregate during thermal experiments or during formulation.<sup>[12,13]</sup> Further supportive characterization was performed with this sample of synthetic G-CSF 2a by additional methods including SDS-PAGE and proteolytic mapping using recombinant G-CSF 2b as a standard control.<sup>[14]</sup>

**SDS-PAGE Data for G-CSF 1–174 (22) and G-CSF 1–174 Aglycone (2a).**

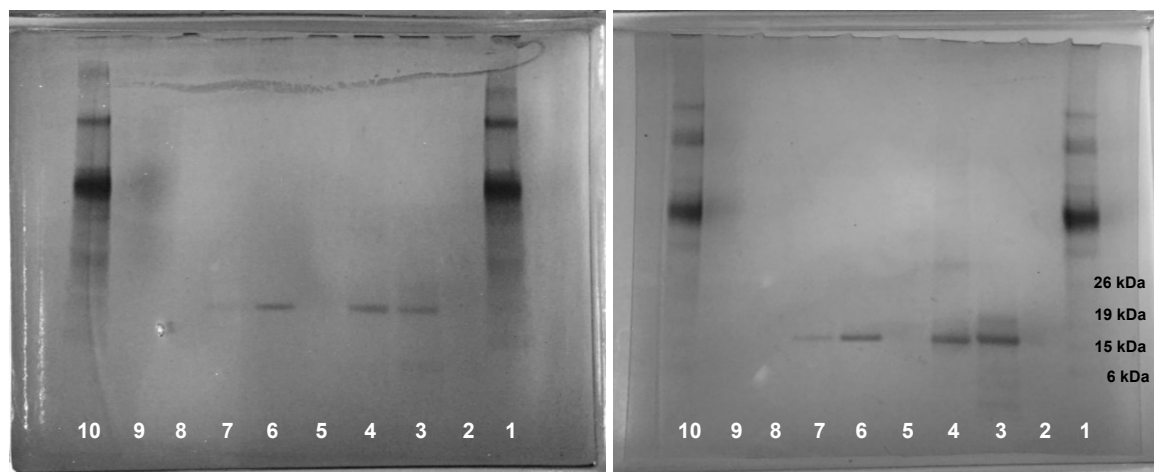

**FIGURE S-2. SDS-PAGE analysis for synthetic G-CSF 1–174 (22), synthetic G-CSF 1–174 Aglycone (2a) and recombinant G-CSF 0–174 (2b). Left:** Samples prepared under reducing conditions. **Right:** Samples prepared under non-reducing conditions. Gels were developed for 4 min 35 secs. **Lanes.** 1 – MW Marker, Benchmark™ Protein Ladder, 2 – blank (no sample), 3 – Non-folded G-CSF **22** (26  $\mu$ L from stock estimated at 200  $\mu$ g/mL, AGR-IV-69), 4 – Folded G-CSF **2a** (26  $\mu$ L from stock calc. at 92  $\mu$ g/mL, AGR-III-250, synthetic, February 2015), 5 – blank (no sample), 6 – Amgen G-CSF **2b** (20  $\mu$ L of 450  $\mu$ g/mL = 9  $\mu$ g loaded), 7 – Amgen G-CSF **2b** (20  $\mu$ L of 150  $\mu$ g/mL = 3  $\mu$ g loaded), 8 – Amgen G-CSF **2b** (20  $\mu$ L of 50  $\mu$ g/mL = 1  $\mu$ g), 9 – blank (no sample), 10 – MW Marker, Benchmark™ Protein Ladder.

### Enzymatic Digestion and Disulfide Mapping of Synthetic G-CSF (2a) Compared with Recombinant G-CSF (2b).

Data was acquired with a full MS spectrum ( $m/z$  300 to 1650, AGC: 1e6) at resolution  $R = 120000$  followed by 10 MS/MS scans (isolation width: 2.0) of the most abundant ions from the full MS scan.

**Enzymatic Digestion and Disulfide Mapping.** Disulfide mapping was performed using the method of Mo *et al.* with slight modification.<sup>[14]</sup> Non-reduced recombinant human granulocyte-colony stimulating factor (**2b**, rhG-CSF) and non-reduced synthetic GCSF **2a** were prepared by alkylating the sample with N-ethylmaleimide (NEM) at a 1:100 in excess molar ratio and incubating at 37 °C for 2 h at pH = 7.0. The samples were then digested overnight with Glu-C (25:1 protein / enzyme ratio) at 37 °C. A 1  $\mu$ L aliquot of chymotrypsin (1  $\mu$ g /  $\mu$ L) was added to the samples and incubated at 37 °C for an additional 4 h. The reduced samples were prepared by adding 1:1 (v/v) 100mM dithiothreitol (DTT) and incubating at 65 °C for 30 min. All the samples were desalted using a C18 disc (Empore). Digested and desalted peptides were then analyzed using a reverse phase C18 column (ACQUITY UPLC Peptide BEH C18 nanoACQUITY Column, 10K psi, 130Å, 1.7  $\mu$ m, 100  $\mu$ m  $\times$  100 mm; Waters Corp, Milford, MA) on a Waters nanoACQUITY UPLC with a gradient of 0 to 50 % Buffer B (0.1% formic acid in CH<sub>3</sub>CN) over 90 min at a flow rate of 300 nL / min. High-resolution MS (LC-MS) data was collected on an Orbitrap Elite mass spectrometer (Thermo Scientific). Data was acquired with a full MS spectrum ( $m/z$  300 to 1650, AGC: 1e6) at resolution  $R = 120000$  followed by 10 MS/MS scans (isolation width: 2.0) of the most abundant ions from the full MS scan.

Cleavage peptides were identified in accord with observations described by Mo *et al.*<sup>[14]</sup> Sequence numbering is consistent with the manuscript, where the N-terminal Met in recombinant G-CSF **2b** is position 0 (Met0).

**See FIGURE S-3.** Data for sequence Lys34–Glu46 which comprises intact disulfide (non-reduced) Cys36–Cys42,  $[M+2H^+]^{2+}$  and  $[M+3H^+]^{3+}$  were observed in both samples **2a** and **2b** under non-reducing conditions.

Ion search for  $[M+2H^+]^{2+}$  calculated value: 766.8654 and  $[M+3H^+]^{3+}$  calculated value: 511.5794.

**See FIGURE S-4.** Data for sequence Lys34–Glu46 which comprises free sulfhydryls (reduced) at Cys36 and Cys42,  $[M+2H^+]^{2+}$  and  $[M+3H^+]^{3+}$  were observed in both samples **2a** and **2b** under reducing conditions.

Ion search for  $[M+2H^+]^{2+}$  calculated value: 767.8733 and  $[M+3H^+]^{3+}$  calculated value: 512.2513.

**See FIGURE S-5.** Data for sequence Ser62–Leu75 which comprises intact disulfide (non-reduced) Cys64–Cys74,  $[M+H^+]^{1+}$  and  $[M+2H^+]^{2+}$  were observed in both samples **2a** and **2b** under non-reducing conditions.

Ion search for  $[M+H^+]^{1+}$  calculated value: 1375.6345 and  $[M+2H^+]^{2+}$  calculated value: 688.3209.

**See FIGURE S-6.** Data for sequence Ser62–Leu75 which comprises free sulfhydryls (reduced) at Cys64 and Cys74,  $[M+H^+]^{1+}$  and  $[M+2H^+]^{2+}$  were observed in both samples **2a** and **2b** under reducing conditions.

Ion search for  $[M+H^+]^{1+}$  calculated value: 1377.6501 and  $[M+2H^+]^{2+}$  calculated value: 689.3287.

## Part VII. Biological Assay Data for G-CSF 1–174 Aglycone (2a).

A proliferation assay of murine myeloblastic NFS-60 cells and a Colony-Forming assay of human primary cord blood CD34<sup>+</sup> cells were used to validate the biological activity of synthetic G-CSF 1–174 aglycone (**2a**) compared with control, recombinant G-CSF 0–174 (**2b**) (Neupogen®, Amgen Inc., CA).<sup>[15,16]</sup>

### Assay I. Murine Myeloblastic NFS-60 Cells.

## Synthetic G-CSF (2a) Induces Cellular Proliferation (NFS-60 Cell Line)

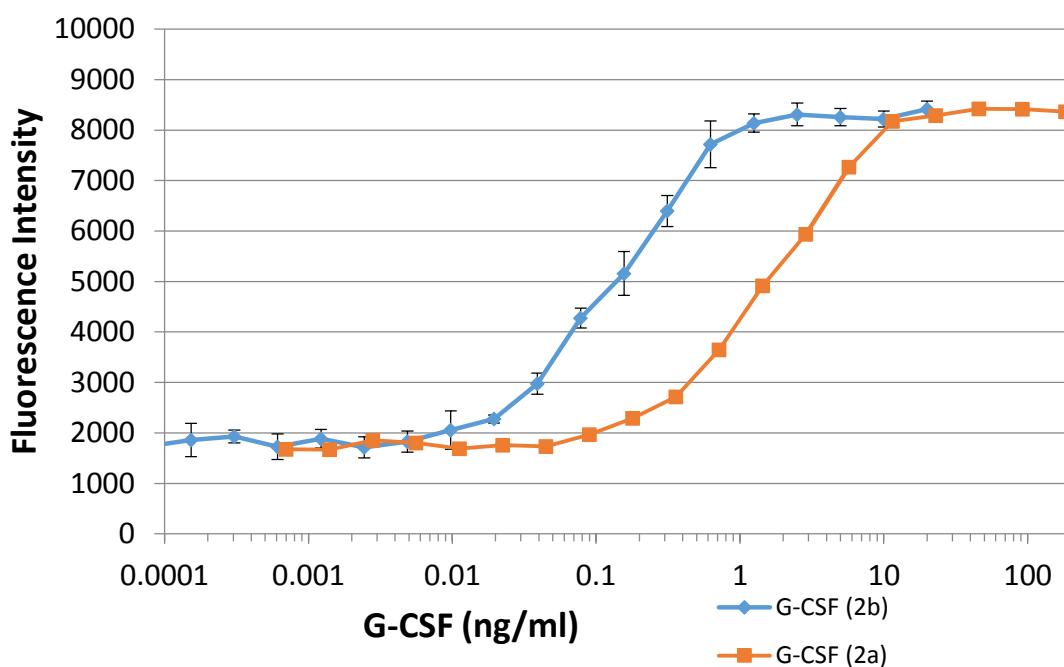

**FIGURE S-7. Murine Myeloblastic NFS-60 Cellular Proliferation Assay:** In-vitro assay measuring the effect of synthetic G-CSF **2a** and recombinant G-CSF **2b** (Amgen) on the proliferation of NFS-60 cells. Results are expressed as average relative fluorescent intensity  $\pm$  SD, run in triplicate.

The murine myeloblastic NFS-60 cells were maintained in Iscove's modified Dulbecco's medium (IMDM) containing 10% Fetal Calf Serum, 20% WEHI-3 conditioned medium, 0.05 mM monothiolglycerol, 2 mM glutamine, 50 units/mL penicillin, and 50  $\mu$ g/mL streptomycin. When the NFS-60 cells were in the log-phase of growth, the cultures were harvested and washed with three times with 10 mL cold IMDM. The 4,000 washed NFS-60 cells/well were cultured in 50  $\mu$ L IMDM containing 20% Knockout™ serum replacement (KOSR) (Life Technologies Inc., NY), 0.05 mM monothiolglycerol, 2 mM glutamine, 50 units/ml penicillin, 50  $\mu$ g/ml streptomycin with or without various doses of synthetic G-CSF **2a** or recombinant G-CSF **2b** in 5% CO<sub>2</sub>, at 37 °C in triplicate. After two days, the cultures were pulsed with AlamarBlue® overnight. A H1 synergy plate reader was used to measure fluorescence intensity. As shown in Figure S-1, the biological activity of synthetic G-CSF **2a** is approximately 10% that of recombinant G-CSF **2b**. The half maximal effective concentration (EC<sub>50</sub>) to induce proliferation of NFS-60 cell line is ~2 ng/ml for synthetic G-CSF **2a** and ~0.2 ng/ml for recombinant G-CSF **2b**.

## Assay II. Colony Forming Assay.

|                               | G-CSF (ng/ml) | KL (ng/ml) | large colony (>50 cells / colony) | small colony (<50 cells / colony) |
|-------------------------------|---------------|------------|-----------------------------------|-----------------------------------|
| G-CSF <b>2a</b> (synthetic)   | 0.00          | 0.00       | 0±0                               | 0±0                               |
|                               | 0.00          | 20.00      | 0±0                               | 6±2                               |
|                               | 20.00         | 0.00       | 31±4                              | 11±1                              |
|                               | 0.02          | 20.00      | 9±2                               | 33±3                              |
|                               | 0.08          | 20.00      | 21±2                              | 49±6                              |
|                               | 0.31          | 20.00      | 21±5                              | 42±8                              |
|                               | 1.25          | 20.00      | 50±4                              | 35±4                              |
|                               | 5.00          | 20.00      | 80±2                              | 34±1                              |
|                               | 20.00         | 20.00      | 110±10                            | 44±3                              |
| G-CSF <b>2b</b> (recombinant) | 20.00         | 0.00       | 45±7                              | 25±6                              |
|                               | 0.02          | 20.00      | 10±1                              | 29±4                              |
|                               | 0.08          | 20.00      | 55±4                              | 46±8                              |
|                               | 0.31          | 20.00      | 92±23                             | 63±3                              |
|                               | 1.25          | 20.00      | 102±5                             | 38±10                             |
|                               | 5.00          | 20.00      | 107±3                             | 43±4                              |
|                               | 20.00         | 20.00      | 121±12                            | 40±3                              |

**TABLE S-1.** Effect of Synthetic G-CSF (**2a**) and Recombinant G-CSF (**2b**) on Colony-Formation of Human Cord Blood CD34<sup>+</sup> Cells.

To further characterize the biological activity of synthetic G-CSF **2a** in normal human hematopoietic progenitor cells, a procedure of colony-forming assay in serum-free media was carried out as described previously with a minor modification.<sup>[15,16]</sup> One thousand purified human primary cord blood CD34<sup>+</sup> cells were cultured in 1 mL of IMDM containing 1.2 % methylcellulose, 30 % KOSR, 1 × Insulin / Transferrin / Selenium solution (Life Technologies Inc.), 0.05 mM monothioglycerol, 2 mM glutamine, 50 units/mL penicillin, 50 µg/mL streptomycin, and with or without various doses of synthetic G-CSF **2a**, recombinant **2b** or human klotho protein (KL) (20 ng/mL) alone or in combination in 5% CO<sub>2</sub> at 37°C in triplicate. After fourteen days, numbers of clusters (< 50 cells/colony) and colony (> 50 cells/colony) were scored under a microscope. As shown in Table S-1, Figure S-2 and Figure S-3, synthetic G-CSF **2a** alone is capable of stimulating proliferation of normal human CD34<sup>+</sup> cells to form clusters and colonies. It also synergizes with human KL to form clusters and colonies. An EC<sub>50</sub> of recombinant G-CSF **2b** synergized with human KL is ~0.08 ng/ml and ~1.25 ng/ml for synthetic G-CSF **2a**, indicating the specific biological activity of synthetic G-CSF **2a** is about ~6.4% of that of the recombinant.



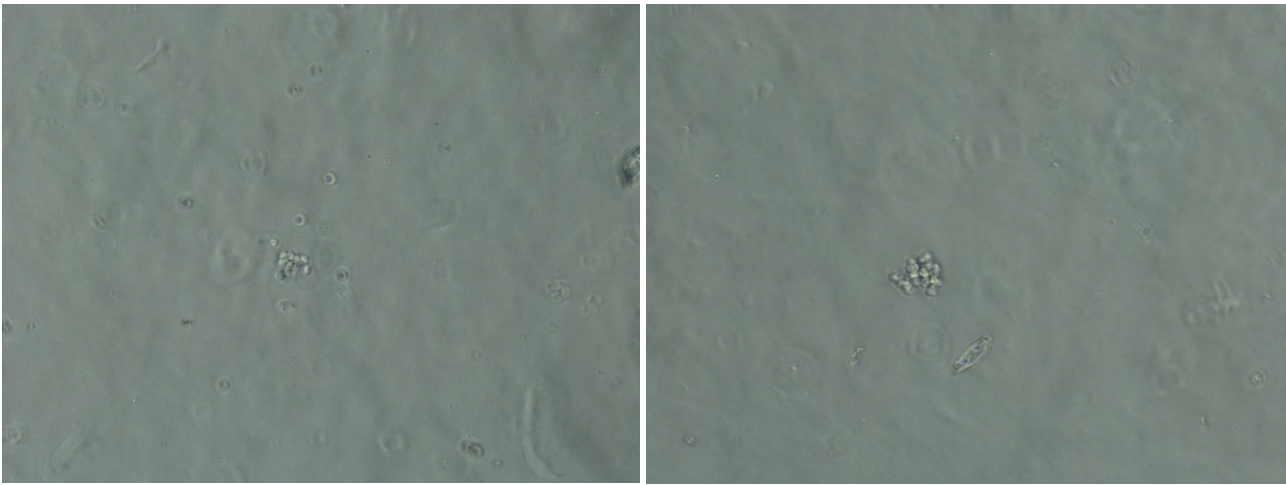

**FIGURE S-8.** Representative Small Colony Formation – **Left:** Image 0009; **Right:** Image 0012.

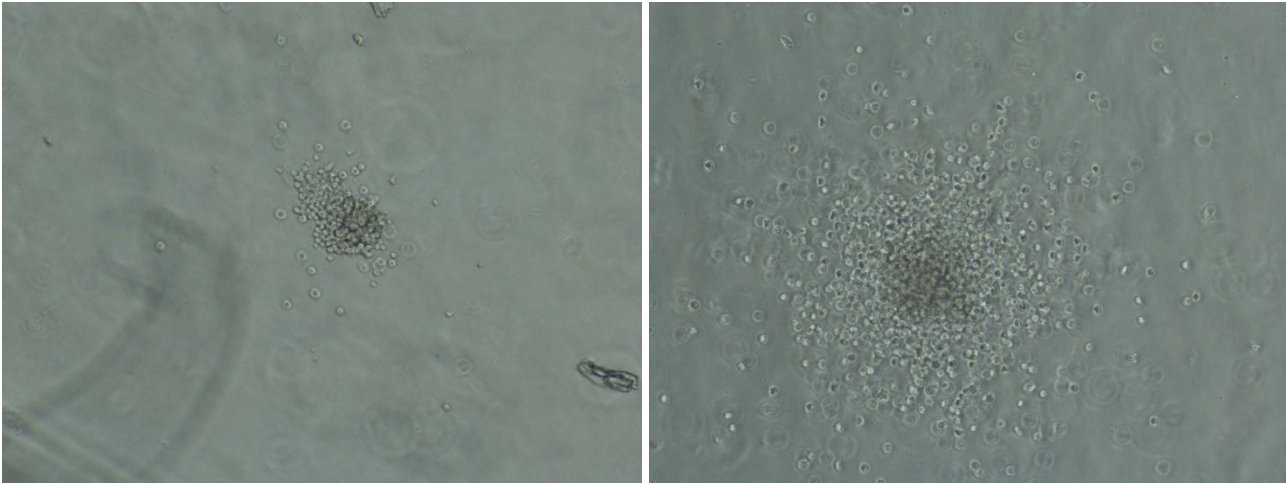

**FIGURE S-9.** Representative Large Colony Formation – **Left:** Image 0013; **Right:** Image 0007.

## **Part VIII. Supporting Information References.**

### **References.**

1. For Fmoc- based SPPS, see: Fields, G. B.; Noble, R. L. *Int. J. Pept. Prot. Res.* **1990**, *35*, 161–214.
2. For microwave-assisted SPPS and protocols, see: Palasek, S. A.; Cox, Z. J.; Collins, J. M. *J. Pept. Sci.* **2007**, *13*, 143–148 and references therein.
3. For the use of Oxyma Pure as a pH modulatory reagent, see: Subirós-Funosas, R.; El-Faham, A.; Albericio, F. *Biopolymers* **2012**, *98*, 89–97.
4. For the use of pseudoproline dipeptides, see: Wöhr, T.; Wahl, F.; Nefzi, A.; Rohwedder, B.; Sato, T.; Sun, X.; Mutter, M. *J. Am. Chem. Soc.* **1996**, *118*, 9218–9227.
5. (a) Sakakibara, S. *Biopolymers* **1995**, *37*, 17–28.; (b) Stuhr-Hansen, N.; Wilbekand, T.S.; Strømgaard, K. *Eur. J. Org. Chem.* **2013**, *24*, 5290–5294.
6. Edelhoch, H. *Biochemistry* **1967**, *6*, 1948–1954.
7. Moffatt, F.; Senkans, P.; Ricketts, D. *J. Chromatogr., A* **2000**, *891*, 235–242.
8. Lu, H. S.; Clogston, C. L.; Narhi, L. O.; Merewether, L. A.; Pearl, W. R.; Boone, T. C. *J. Biol. Chem.* **1992**, *267*, 8770–8777.
9. Bradford, M. M. *Anal. Biochem.* **1976**, *72*, 248–254.
10. Wang, P.; Aussedat, B.; Vohra, Y.; Danishefsky, S. J. *Angew. Chem. Int. Ed.* **2012**, *51*, 11571–11575 and references cited therein.
11. Hackenberger, C. P. R.; O'Reilly, M. K.; Imperiali, B. *J. Org. Chem.* **2005**, *70*, 3574–3578.
12. Veronese, F. M.; Mero, A.; Caboi, F.; Sergi, M.; Marongiu, C.; Pasut, G. *Bioconjugate Chem.* **2007**, *18*, 1824–1830.
13. Natalello, A.; Ami, D.; Collini, M.; D'Alfonso, L.; Chirico, G.; Tonon, G.; Scaramuzza, S.; Schrepfer, R.; Doglia, S. *M. PLoS ONE* **2012**, *7*, e42511.
14. Mo, J.; Tymiak, A. A.; Chen, G. *Rapid Commun. Mass Spectrom.* **2013**, *27*, 940–946.
15. Shirafuji, N.; Asano, S.; Matsuda, S.; Watari, K.; Takaku, F.; Nagata, S. *Exp Hematol.* **1989**, *17*, 116–119.
16. Wang, P.; Dong, S.; Shieh, J.-H.; Peguero, E.; Hendrickson, R.; Moore, M. A. S.; Danishefsky, S. J. *Science* **2013**, *342*, 1357–1360.

Compound (4).

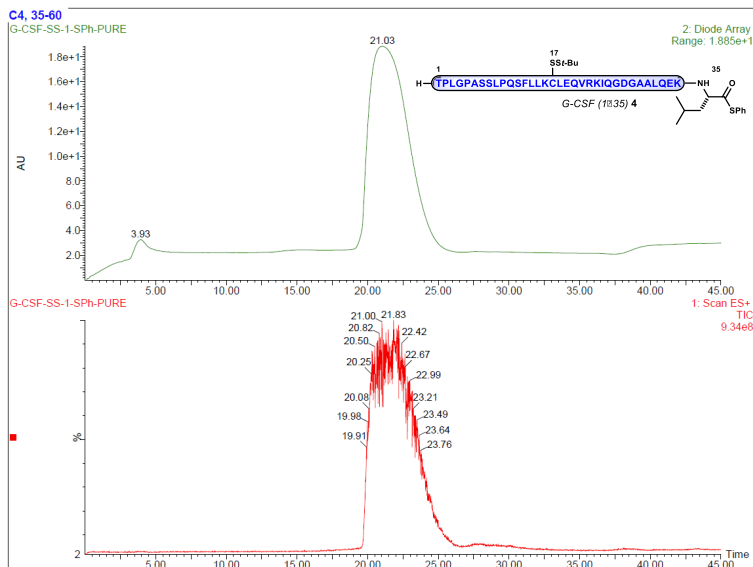

Compound (4).

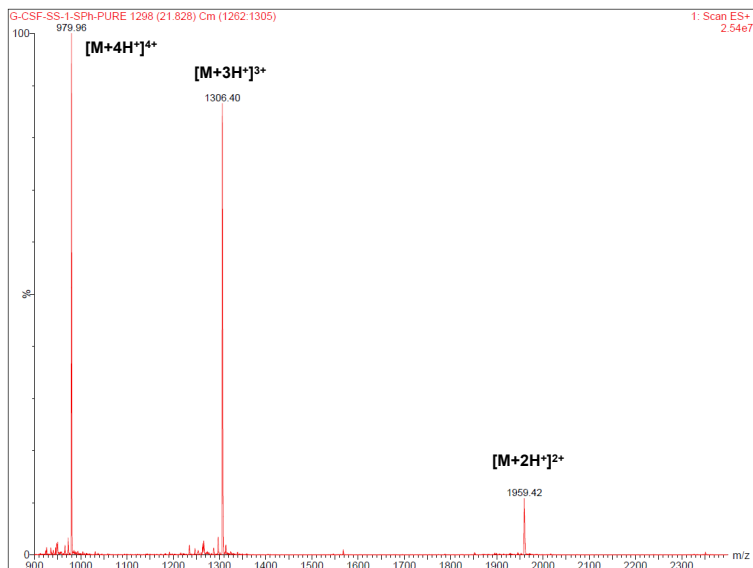

Compound (5).

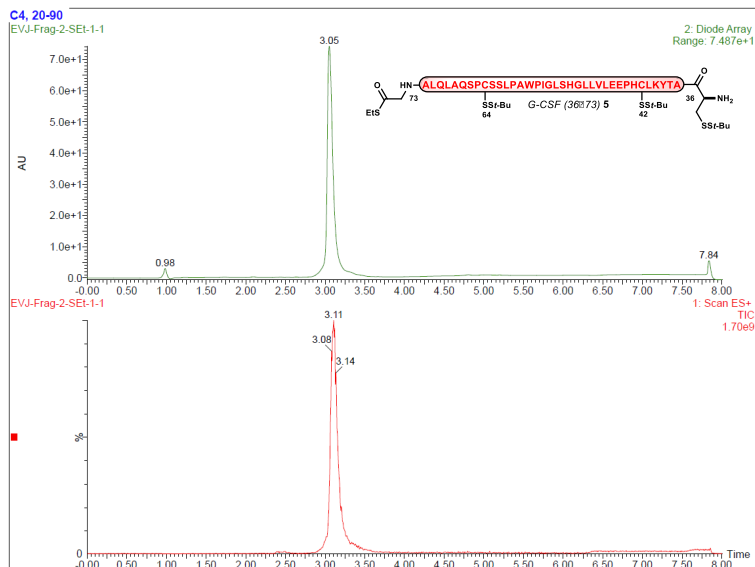

Figure 1.2A Top: UV Trace from UPLC-MS analysis of purified peptide 5; gradient of 20% to 90% solvent B over 6 min at a flow rate of 0.3 mL/min, Acquity UPLC BEH C4 analytical column. Bottom: ESI-MS (+) TIC.

Compound (5).

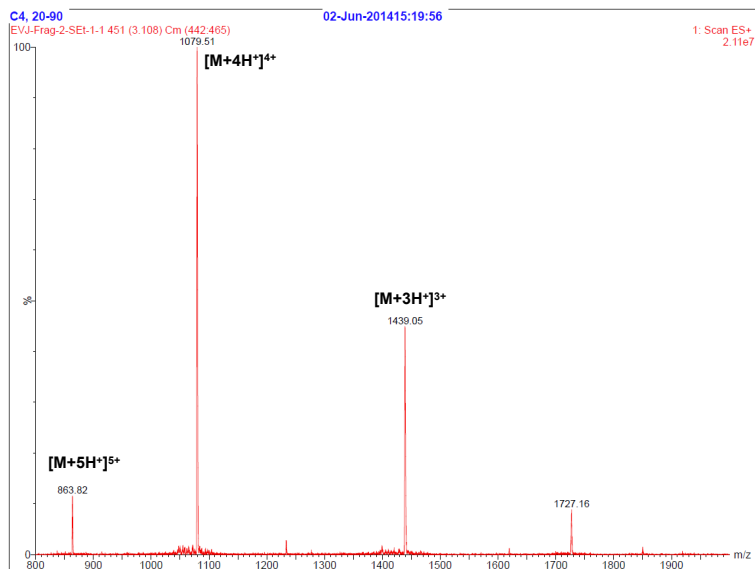

Figure 1.2B ESI-MS (+) of peptide 5.  $M = C_{194}H_{312}N_{46}O_{50}S_7$ . ESI calculated for  $[M+3H]^3+$   $m/z$ : 1438.78, found: 1439.05;  $[M+4H]^4+$   $m/z$ : 1079.34, found: 1079.51;  $[M+5H]^5+$   $m/z$ : 863.67, found: 863.82.

Compound (6).

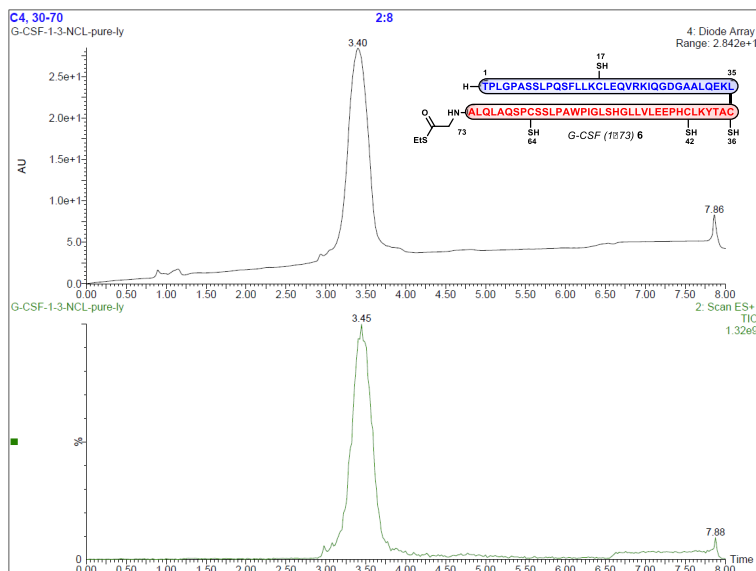

Figure 1.3A Top: UV Trace from UPLC-MS analysis of purified peptide 6; gradient of 30% to 70% solvent B over 6 min at a flow rate of 0.3 mL/min, Acquity UPLC BEH C4 analytical column. Bottom: ESI-MS (+) TIC.

Compound (6).

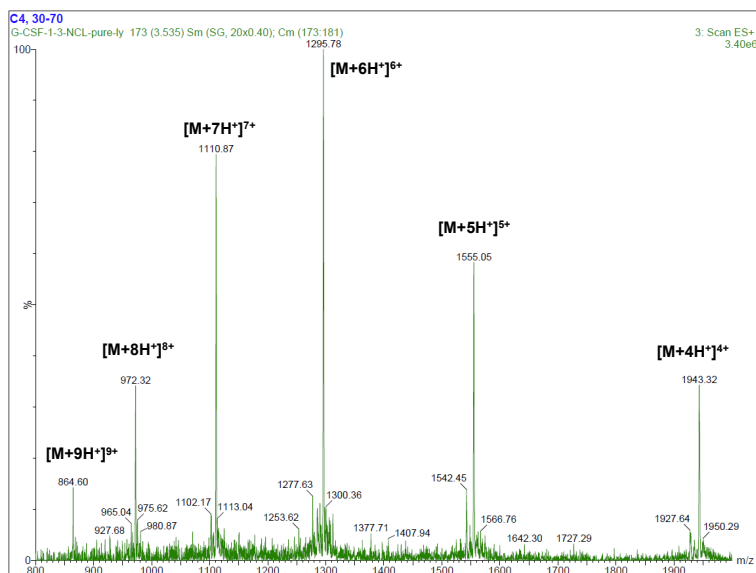

Figure 1.3B ESI-MS (+) of peptide 6. M = C<sub>348</sub>H<sub>565</sub>N<sub>91</sub>O<sub>29</sub>S<sub>5</sub>. ESI calculated for [M+4H]<sup>4+</sup> m/z: 1943.06, found: 1943.32; [M+5H]<sup>5+</sup> m/z: 1554.65, found: 1555.05; [M+6H]<sup>6+</sup> m/z: 1295.71, found: 1295.78; [M+7H]<sup>7+</sup> m/z: 1110.75, found: 1110.87; [M+8H]<sup>8+</sup> m/z: 972.03, found: 972.32; [M+9H]<sup>9+</sup> m/z: 864.14, found: 864.60.

Compound (6).  
(macrocycle)

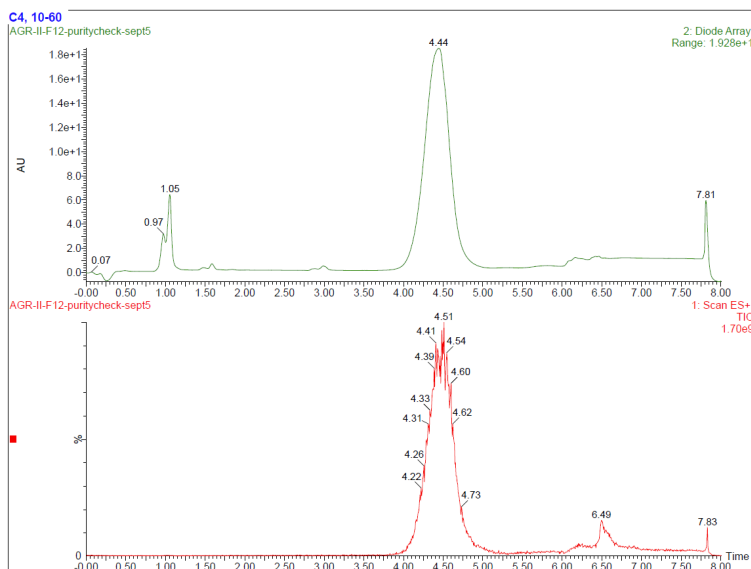

Figure 1.4A Top: UV Trace from UPLC-MS analysis of purified peptide 6 (with macrocycle); gradient of 10% to 60% solvent B over 6 min at a flow rate of 0.3 mL/min, Acquity UPLC BEH C4 analytical column. Bottom: ESI-MS (+) TIC.

Compound (6).  
(macrocycle)

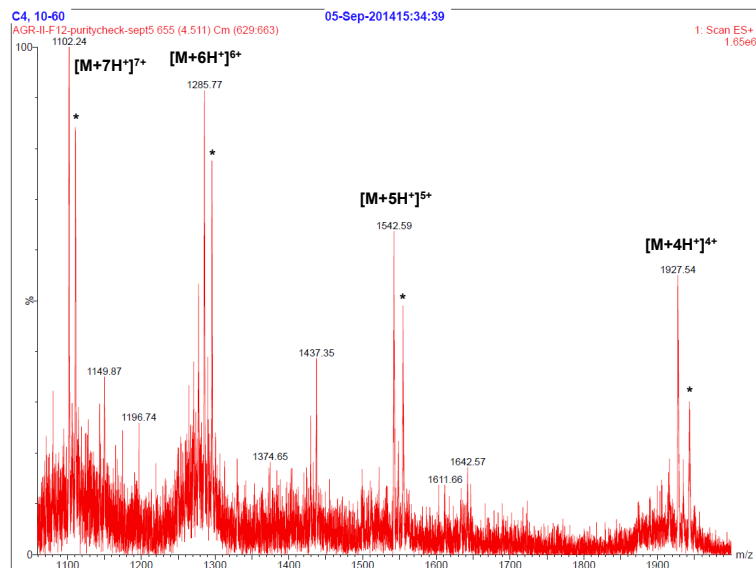

Figure 1.4B ESI-MS (+) of peptide 6 (macrocycle).  $M = C_{346}H_{559}N_{91}O_{99}S_4$ . ESI calculated for  $[M+4H]^{4+}$   $m/z$ : 1927.42, found: 1927.54;  $[M+5H]^{5+}$   $m/z$ : 1542.22, found: 1542.59;  $[M+6H]^{6+}$   $m/z$ : 1285.35, found: 1285.77;  $[M+7H]^{7+}$   $m/z$ : 1101.87, found: 1102.24. \*indicates presence of 6 in sample spectrum.

Compound (7).

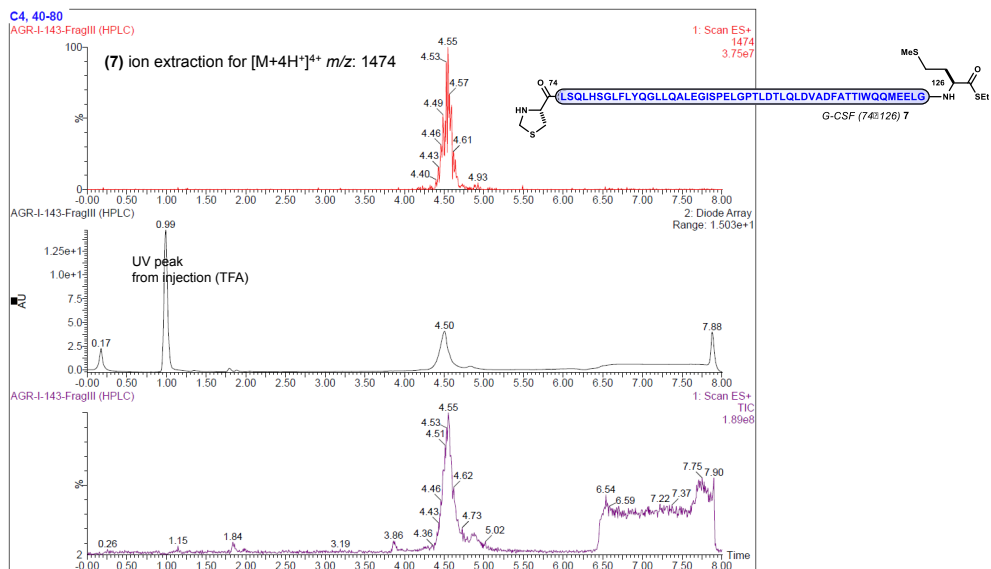

**Figure 1.5A Top:** ESI (+), ion extraction for  $[M+4H]^{4+}$   $m/z$ : 1474. **Middle:** UV Trace from UPLC-MS analysis of purified peptide 7; gradient of 40% to 80% solvent B over 6 min at a flow rate of 0.3 mL/min, Acquity UPLC BEH C4 analytical column. **Bottom:** ESI-MS (+) TIC.

Compound (7).

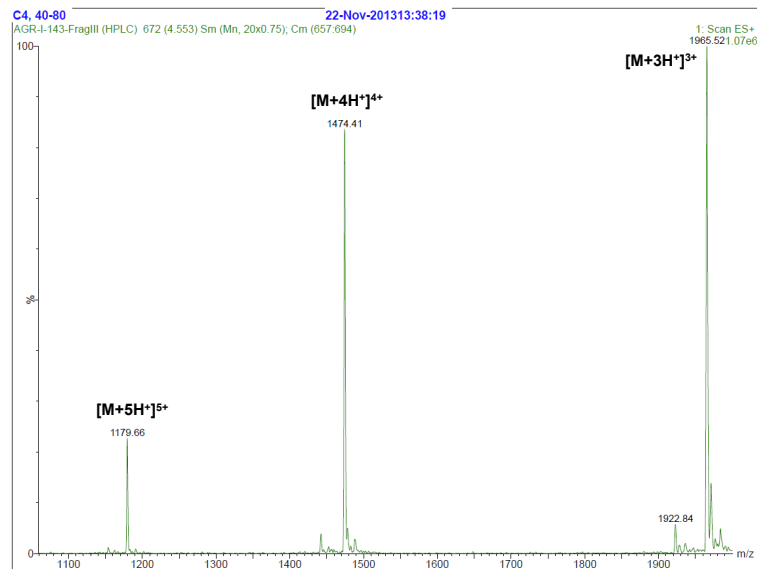

**Figure 1.5B** ESI-MS (+) of peptide 7.  $M = C_{265}H_{414}N_{63}O_{21}S_4$ . ESI calculated for  $[M+3H]^{3+}$   $m/z$ : 1965.28, found: 1965.52;  $[M+4H]^{4+}$   $m/z$ : 1474.21, found: 1474.41;  $[M+5H]^{5+}$   $m/z$ : 1179.57, found: 1179.66.

Compound (8).

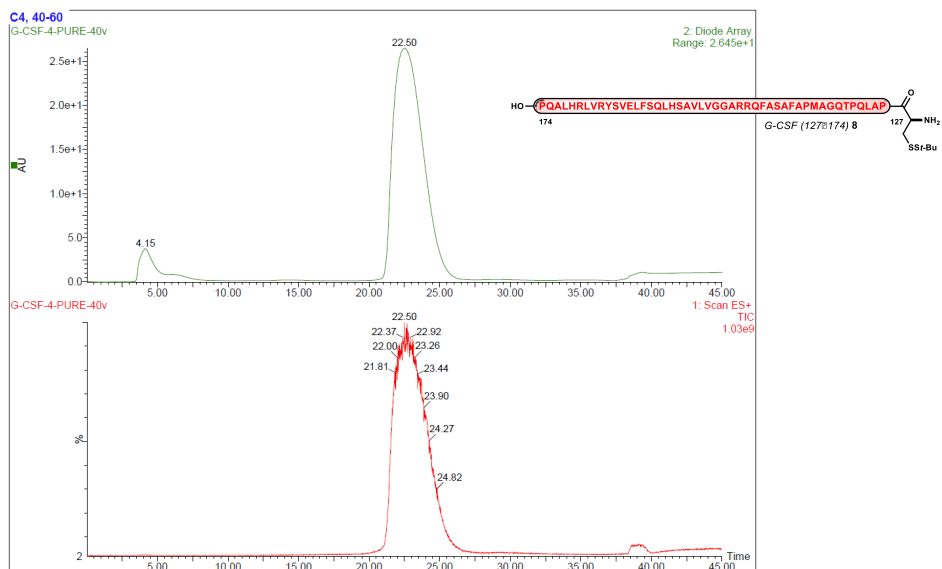

Compound (8).

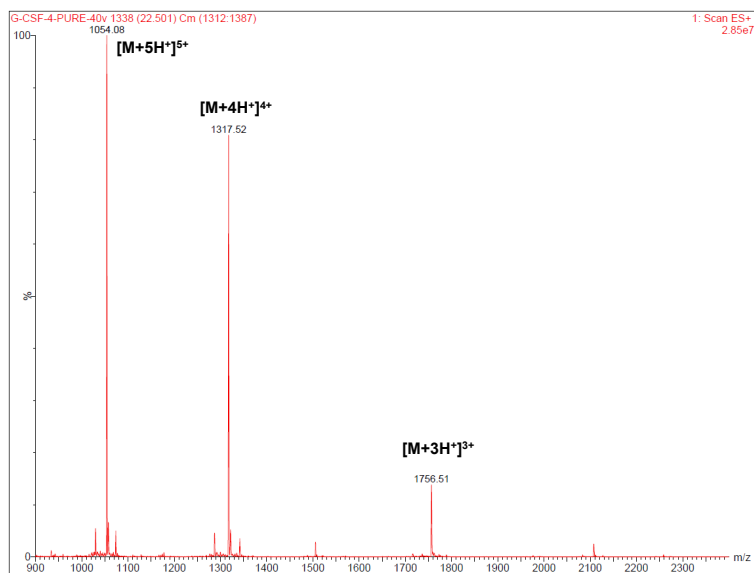



Compound **(9a)**.  
(crude reaction)

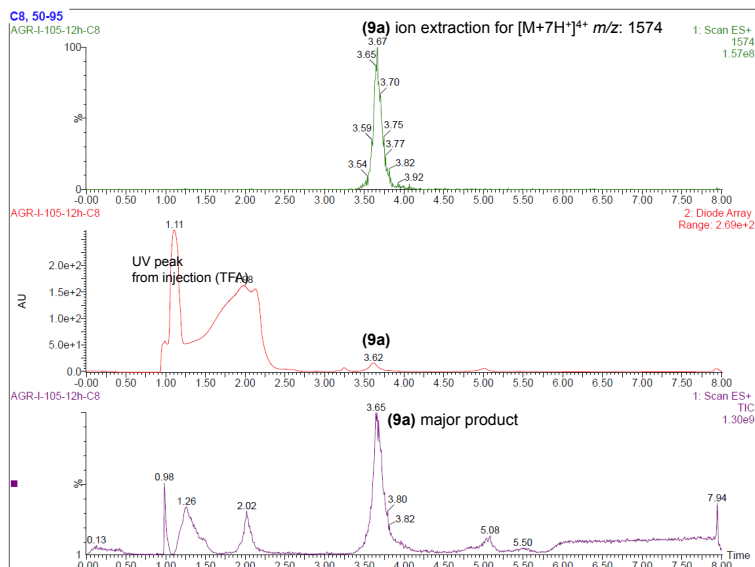

Figure 1.7A Top: ESI (+), ion extraction for **9a**,  $[M+7H]^{7+}$   $m/z$ : 1574 Middle: UV Trace from UPLC-MS analysis of crude reaction to prepare **9a**; gradient of 50% to 95% solvent B over 6 min at a flow rate of 0.3 mL/min, Acquity UPLC BEH C4 analytical column. Bottom: ESI-MS (+) TIC.

Compound **(9a)**.  
(crude reaction)

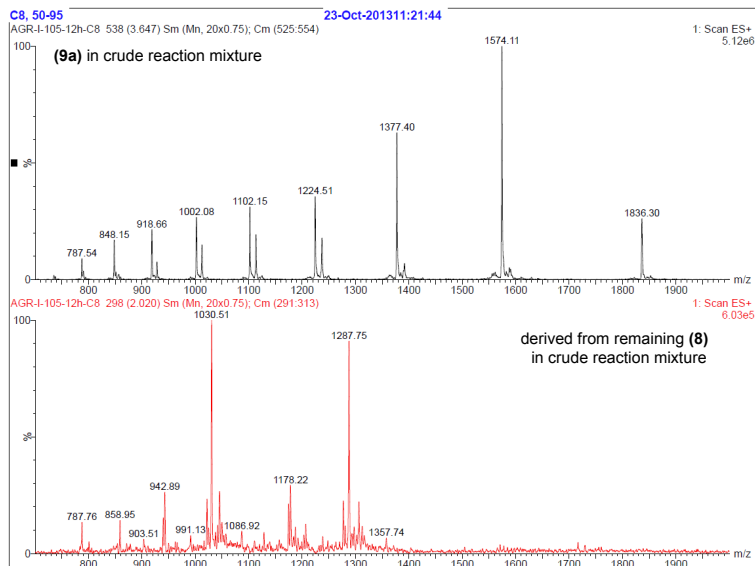

Figure 1.7B Top: ESI-MS (+) for crude product **9a**. Bottom: ESI-MS (+) for peptide derived from excess peptide **8**.

Compound (9a).

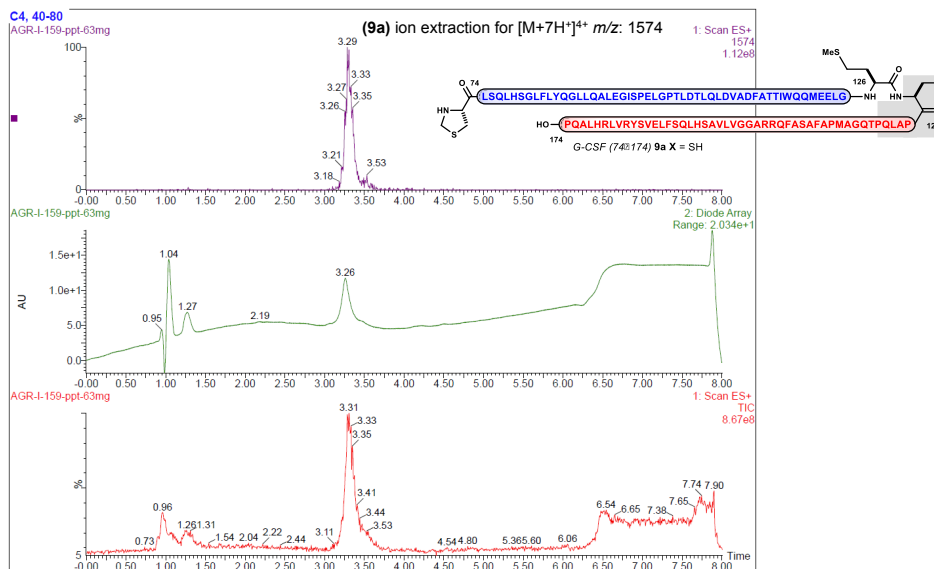

**Figure 1.8A Top:** ESI (+), ion extraction for **9a**,  $[M+7H]^{7+}$   $m/z$ : 1574 **Middle:** UV Trace from UPLC-MS analysis of purified peptide **9a** (precipitation); gradient of 40% to 80% solvent B over 6 min at a flow rate of 0.3 mL/min, Acquity UPLC BEH C4 analytical column. **Bottom:** ESI-MS (+) TIC.

Compound (9a).

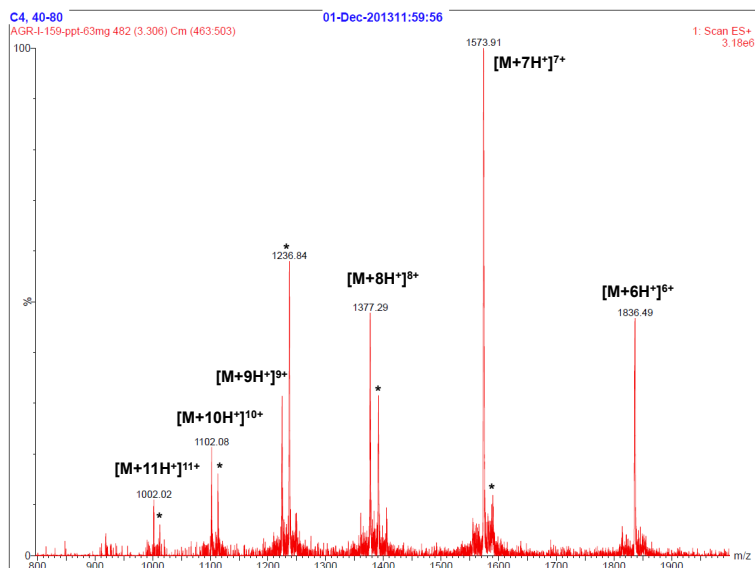

**Figure 1.8B** ESI-MS (+) of peptide **9a**.  $M = C_{495}H_{725}N_{131}O_{143}S_5$ . ESI calculated for  $[M+6H]^{6+}$   $m/z$ : 1835.96, found: 1836.49;  $[M+7H]^{7+}$   $m/z$ : 1573.83, found: 1573.91;  $[M+8H]^{8+}$   $m/z$ : 1377.22, found: 1377.29;  $[M+9H]^{9+}$   $m/z$ : 1224.31, found: 1224.74;  $[M+10H]^{10+}$   $m/z$ : 1101.98, found: 1102.08;  $[M+11H]^{11+}$   $m/z$ : 1001.89, found: 1002.02. \* indicates the presence of a TFA adduct.

Compound **(9abc)**  
(crude reaction)

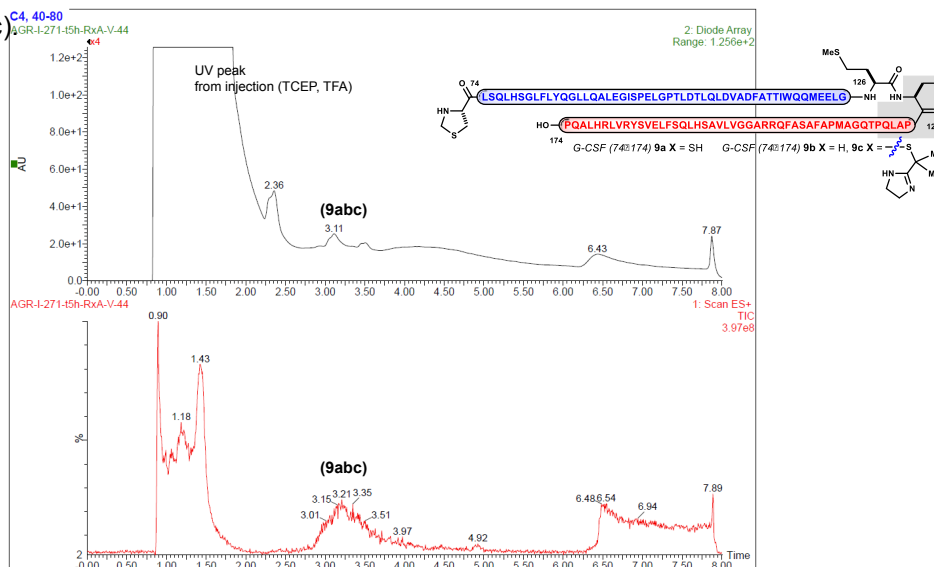

Figure 1.9A Top: UV Trace from UPLC-MS analysis of crude reaction to convert **9a** into **9b**; gradient of 40% to 80% solvent B over 6 min at a flow rate of 0.3 mL/min, Acquity UPLC BEH C4 analytical column. Bottom: ESI-MS (+) TIC.

Compound **(9abc)**  
(crude reaction)

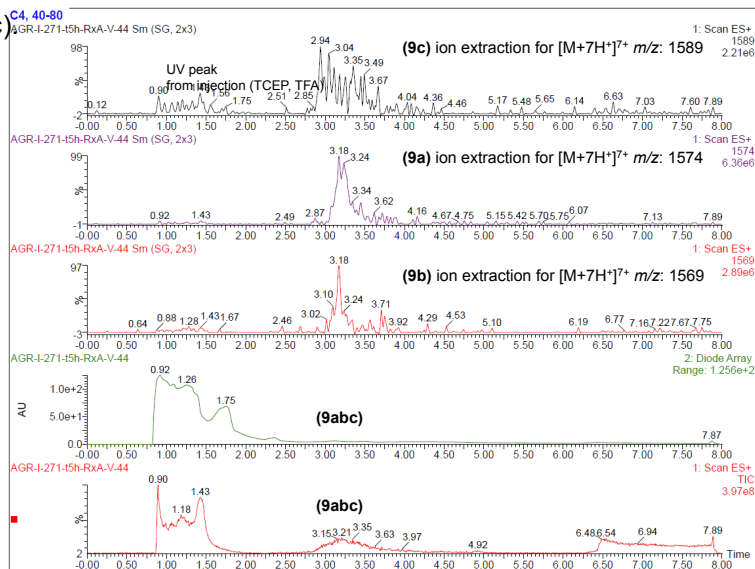

Figure 1.9B Top: ESI (+), ion extraction for **9c**, [M+7H]<sup>7+</sup> m/z: 1589 Middle (1): ESI (+), ion extraction for **9a**, [M+7H]<sup>7+</sup> m/z: 1574 Middle (2): ESI (+), ion extraction for **9b**, [M+7H]<sup>7+</sup> m/z: 1569 Middle (3): UV Trace from UPLC-MS analysis of crude reaction to convert **9a** into **9b**; gradient of 40% to 80% solvent B over 6 min at a flow rate of 0.3 mL/min, Acquity UPLC BEH C4 analytical column. Bottom: ESI-MS (+) TIC.

Compound **(9abc)**  
(crude reaction)

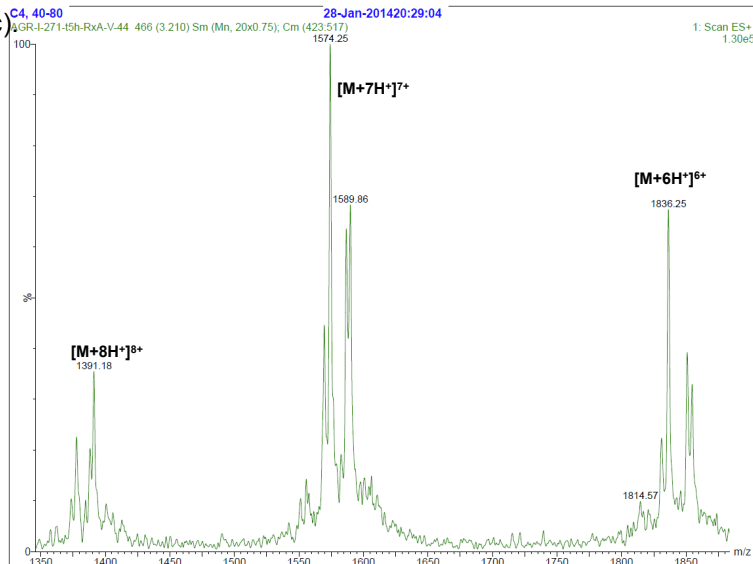

Figure 1.9C ESI-MS (+) of peptide **9abc**. Extracted mass from t = 2.8 to 3.8 min.

**9a**, ESI calculated for [M+8H]<sup>8+</sup> m/z: 1377.22, found: 1377.75, [M+7H]<sup>7+</sup> m/z: 1573.83, found: 1574.25; [M+6H]<sup>6+</sup> m/z: 1835.96, found: 1836.25.  
**9b**, ESI calculated for [M+8H]<sup>8+</sup> m/z: 1373.22, found: 1373.62, [M+7H]<sup>7+</sup> m/z: 1569.25, found: 1569.68; [M+6H]<sup>6+</sup> m/z: 1830.62, found: 1831.00.  
**9c**, ESI calculated for [M+8H]<sup>8+</sup> m/z: 1390.99, found: 1391.18, [M+7H]<sup>7+</sup> m/z: 1589.56, found: 1589.86; [M+6H]<sup>6+</sup> m/z: 1854.32, found: 1854.63.

Compound **(9abc)**  
(crude reaction)

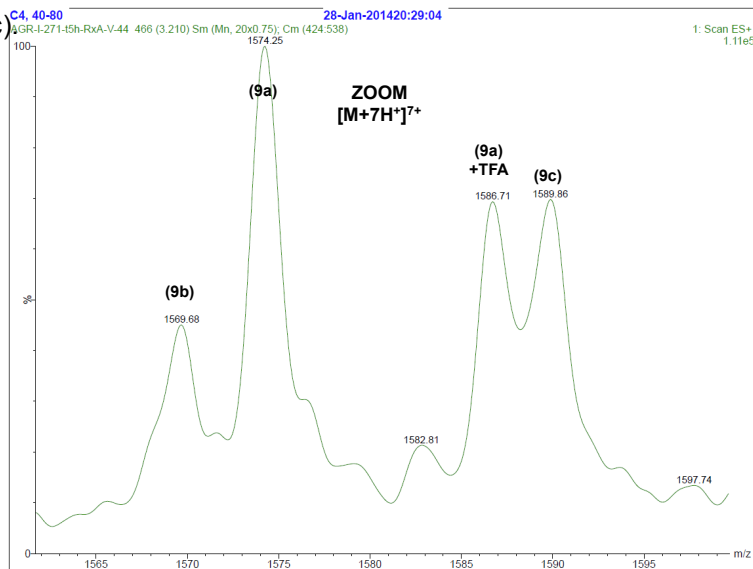

Figure 1.9D ESI-MS (+) of peptide **9abc**. Extracted mass from t = 2.8 to 3.8 min.

**9a**, ESI calculated for [M+7H]<sup>7+</sup> m/z: 1573.83, found: 1574.25.  
**9b**, ESI calculated for [M+7H]<sup>7+</sup> m/z: 1569.25, found: 1569.68.  
**9c**, ESI calculated for [M+7H]<sup>7+</sup> m/z: 1589.56, found: 1589.86.

Compound (12).  
(LC-MS analysis)

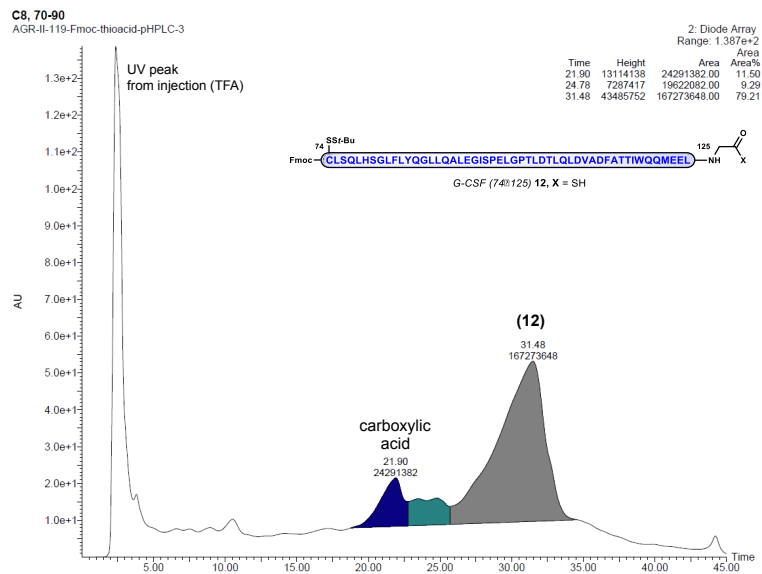

Figure 1.10A Top: UV Trace from LC-MS analysis of HPLC purified peptide 12; gradient of 70% to 90% solvent B over 30 min at a flow rate of 0.2 mL/min, X-Bridge C8 analytical column.

Compound (12).  
(LC-MS analysis)

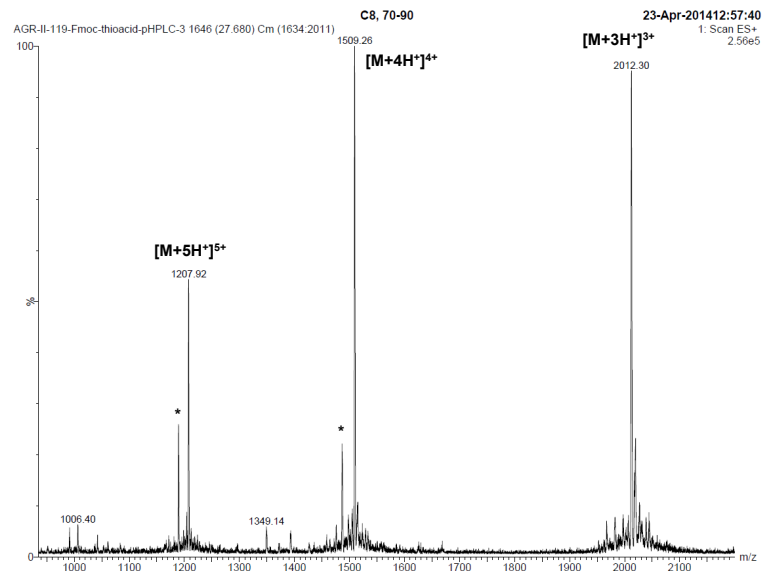

Figure 1.10B ESI-MS (+) of peptide 12.  $M = C_{276}H_{419}N_{61}O_{82}S_4$ . ESI calculated for  $[M+3H]^{3+}$   $m/z$ : 2011.67, found: 2012.30;  $[M+4H]^{4+}$   $m/z$ : 1509.00, found: 1509.26;  $[M+5H]^{5+}$   $m/z$ : 1207.40, found: 1207.92. \* indicates presence of corresponding carboxylic acid in spectrum.





Compound (12)

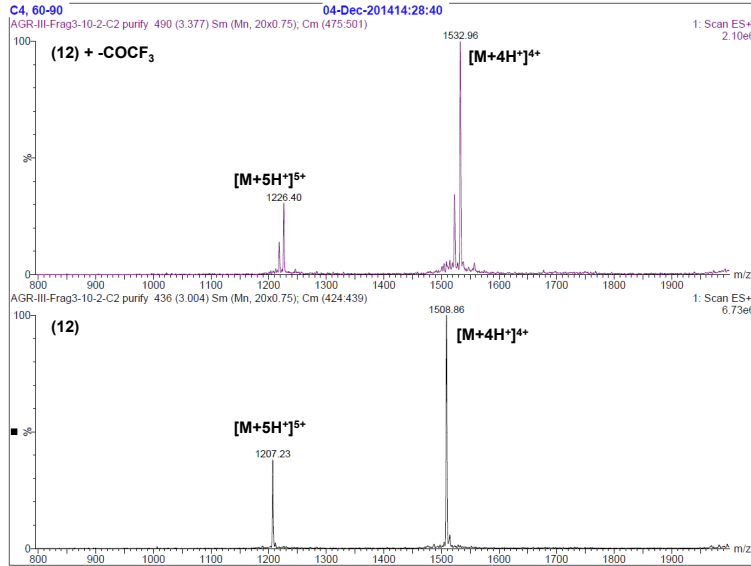

**Figure 1.11C Top:** ESI-MS (+) of peptide **12** + -COCF<sub>3</sub>, M = C<sub>276</sub>H<sub>418</sub>F<sub>3</sub>N<sub>61</sub>O<sub>83</sub>S<sub>4</sub>, ESI calculated for [M+4H]<sup>4+</sup> m/z: 1533.00, found: 1532.96; [M+5H]<sup>5+</sup> m/z: 1226.60, found: 1226.40. **Bottom:** ESI-MS (+) of peptide **12**, M = C<sub>276</sub>H<sub>419</sub>N<sub>61</sub>O<sub>82</sub>S<sub>4</sub>, ESI calculated for [M+4H]<sup>4+</sup> m/z: 1509.00, found: 1508.86; [M+5H]<sup>5+</sup> m/z: 1207.40, found: 1207.23.

Compound (13)

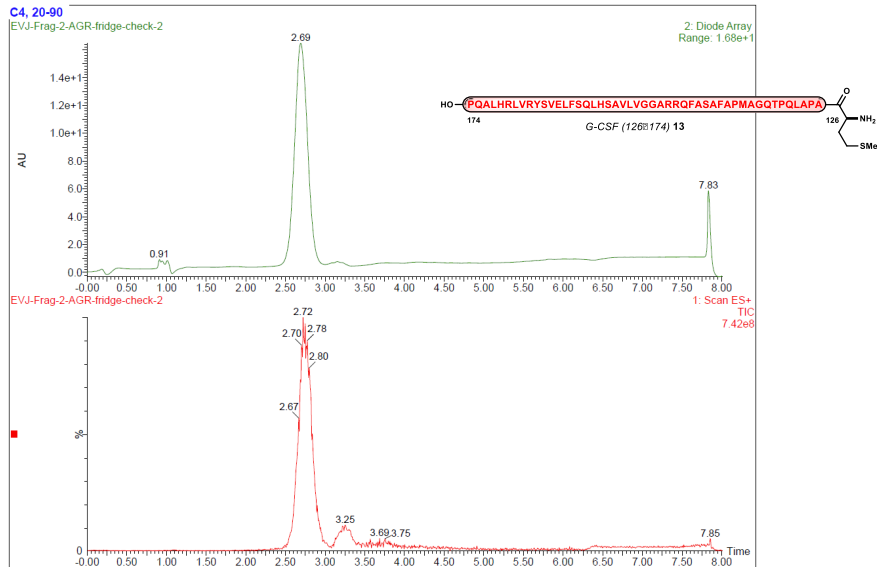

**Figure 1.12A Top:** UV Trace from UPLC-MS analysis of purified peptide **13**; gradient of 20% to 90% solvent B over 6 min at a flow rate of 0.3 mL/min, Acquity UPLC BEH C4 analytical column. **Bottom:** ESI-MS (+) TIC.



Compound (13).

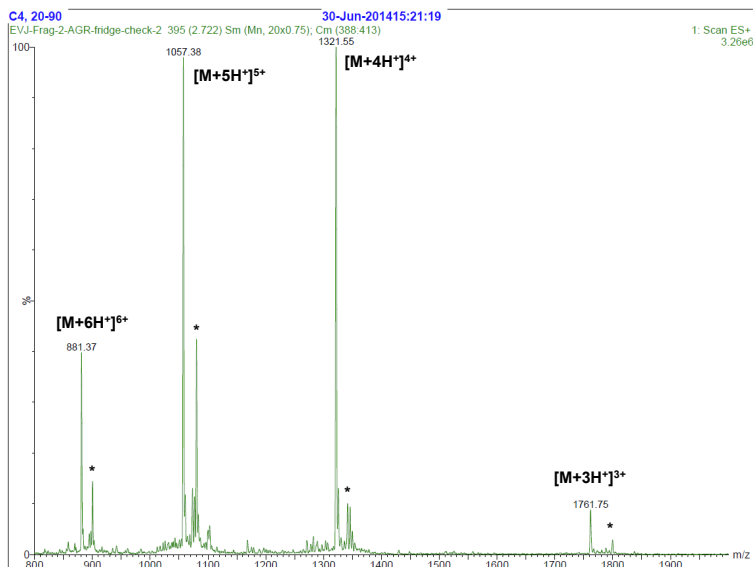

Figure 1.12B ESI-MS (+) of peptide 13. M = C<sub>237</sub>H<sub>376</sub>N<sub>70</sub>O<sub>63</sub>S<sub>2</sub>. ESI calculated for [M+3H]<sup>3+</sup> m/z: 1760.39, found: 1761.75; [M+4H]<sup>4+</sup> m/z: 1320.55, found: 1321.55; [M+5H]<sup>5+</sup> m/z: 1056.64, found: 1057.38; [M+6H]<sup>6+</sup> m/z: 880.70, found: 881.37. \* indicates presence of TFA adduct in spectrum.

Compound (14).  
(crude reaction)

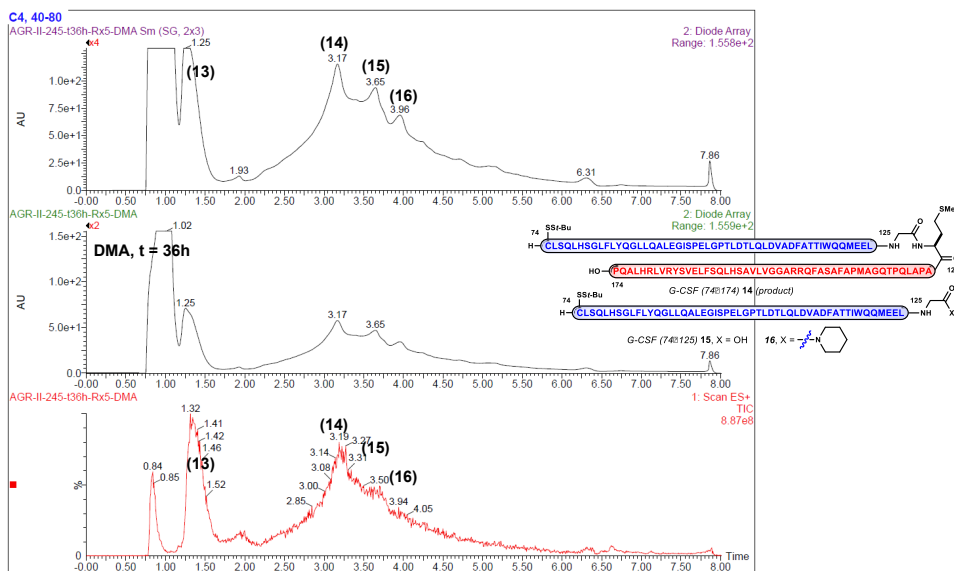

Figure 1.13A Top and Middle: Enlarged (4x) and (2x) UV Trace from UPLC-MS analysis of crude reaction in DMA to prepare peptide 14. Following reaction aliquot, treatment with piperidine, precipitation with Et<sub>2</sub>O and dissolution. Gradient of 40% to 80% solvent B over 6 min at a flow rate of 0.3 mL/min, Acquity UPLC BEH C4 analytical column. Bottom: ESI-MS (+) TIC.

Compound (14)  
(crude reaction)

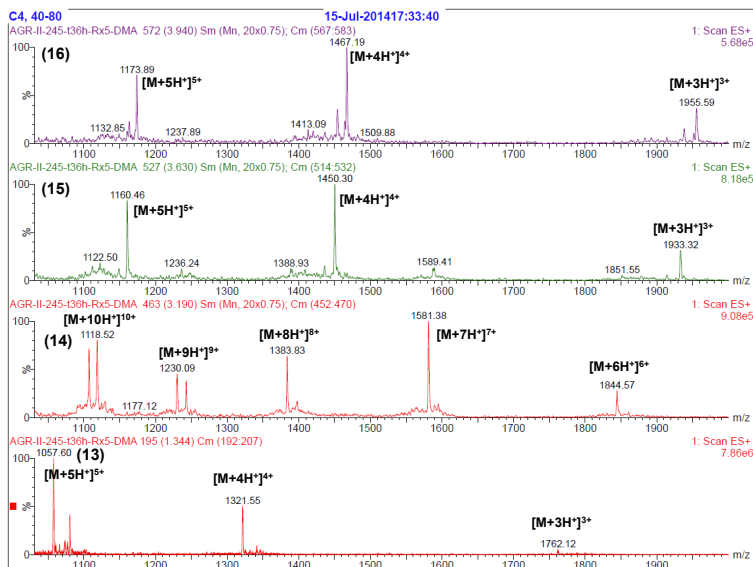

**Figure 1.13B Top:** Product identified as piperide (16) at 3.94 min, found  $[M+3H]^3+$ ,  $[M+4H]^4+$ ,  $[M+5H]^5+$ .  
**Middle (1):** Product identified as carboxylic acid (15) at 3.63 min, found  $[M+3H]^3+$ ,  $[M+4H]^4+$ ,  $[M+5H]^5+$ .  
**Middle (2):** Product identified as desired peptide (14) at 3.19 min, found  $[M+6H]^6+$ ,  $[M+7H]^7+$ ,  $[M+8H]^8+$ ,  $[M+9H]^9+$ ,  $[M+10H]^{10+}$ .  
**Bottom:** Remaining (13) at 1.34 min, found  $[M+3H]^3+$ ,  $[M+4H]^4+$ ,  $[M+5H]^5+$ .

Compound (14).  
(crude reactions)

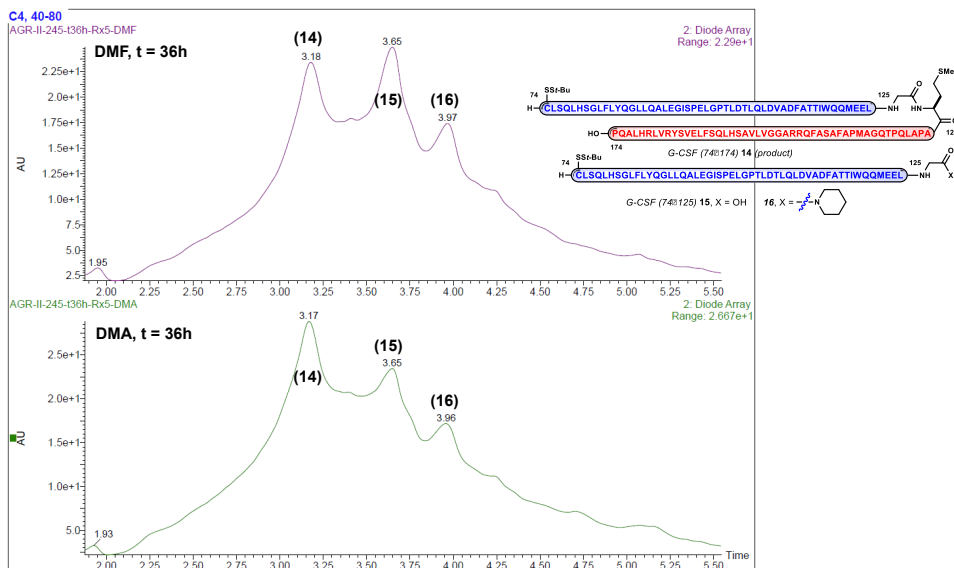

**Figure 1.13C Top:** UV Trace from UPLC-MS analysis of crude reaction in DMF to prepare peptide 14. **Bottom:** UV Trace from UPLC-MS analysis of crude reaction in DMA to prepare peptide 14. Following reaction aliquot, treatment with piperidine, precipitation with Et<sub>2</sub>O and dissolution. Gradient of 40% to 80% solvent B over 6 min at a flow rate of 0.3 mL/min, Acquity UPLC BEH C4 analytical column.

Compound (14).  
(crude reactions)  
t = 20h, 1d

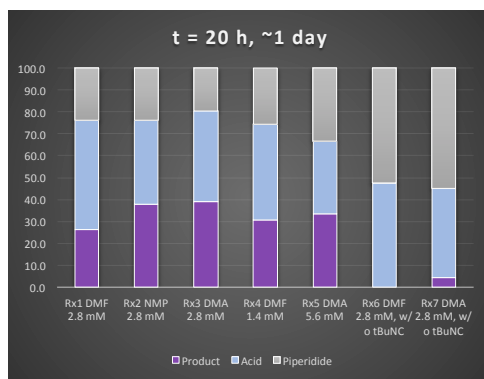

Figure 1.14A Graphical representation of relative ratio of product 14, acid 15 and piperidine 16 at t = 20h.

Compound (14).  
(crude reactions)  
t = 44h, 2d

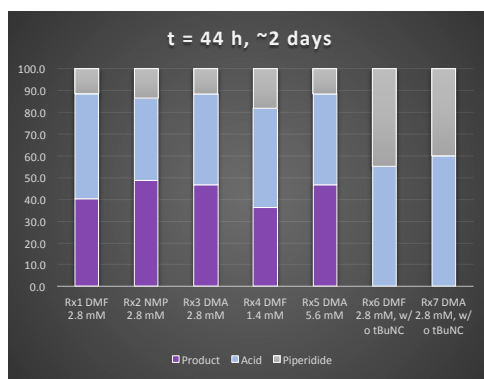

Figure 1.14B Graphical representation of relative ratio of product 14, acid 15 and piperidine 16 at t = 44h.

Compound (14).  
 (crude reactions)  
 t = 72h, 3d

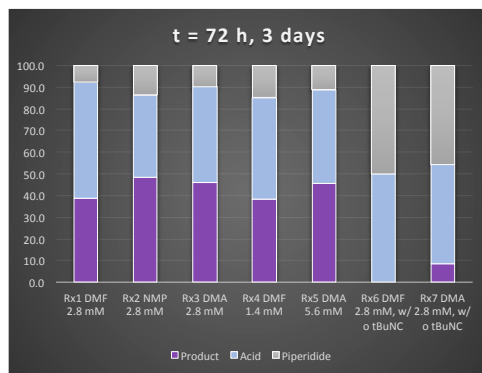

Figure 1.14C Graphical representation of relative ratio of product 14, acid 15 and piperidine 16 at t = 72h.

Compound (14).  
 (purification)

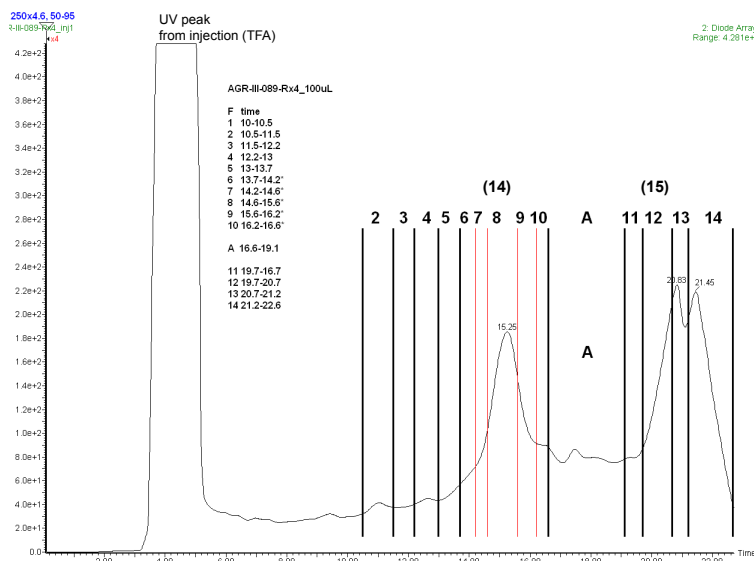

Figure 1.15 UV trace from HPLC purification of peptide 14 (range 0 to 22 min); gradient of 55% to 95% solvent B over 30 min at a flow rate of 0.8 mL/min, Higgins C4 semi-preparative column. Fractions 6 to 10 contain product 14 (t = 15.3 min) and were pooled for isolated yield. Fractions 11 and 12 contain carboxylic acid 15 (t = 20.8 min). Fraction A contains impure desired 14 and trifluoroacetate esters of 14.

Compound (14)

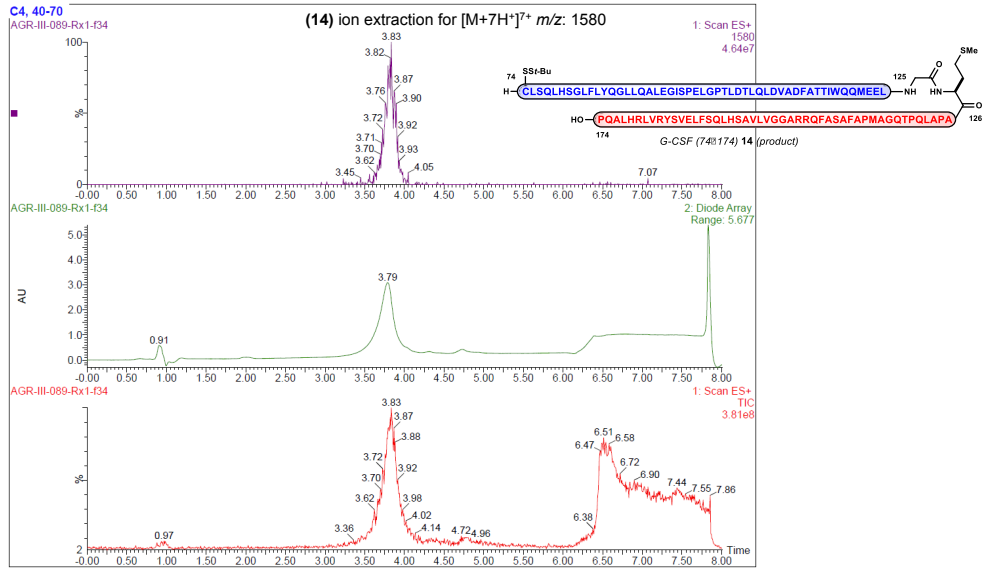

Figure 1.16A Top: ESI (+), ion extraction for  $[M+7H]^+ m/z: 1580$ . Middle: UV Trace from UPLC-MS analysis of purified peptide 14; gradient of 40% to 70% solvent B over 6 min at a flow rate of 0.3 mL/min, Acquity UPLC BEH C4 analytical column. Bottom: ESI-MS (+) TIC.

Compound (14).

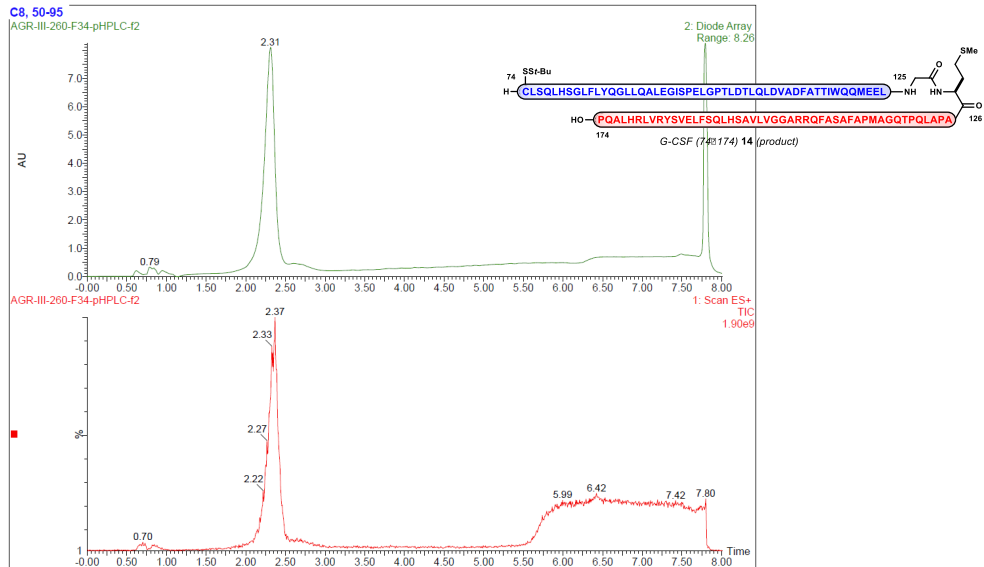

Figure 1.16B Top: UV Trace from UPLC-MS analysis of purified peptide 14; gradient of 50% to 95% solvent B over 6 min at a flow rate of 0.3 mL/min, Acquity UPLC BEH C4 analytical column. Bottom: ESI-MS (+) TIC.

Compound (14).

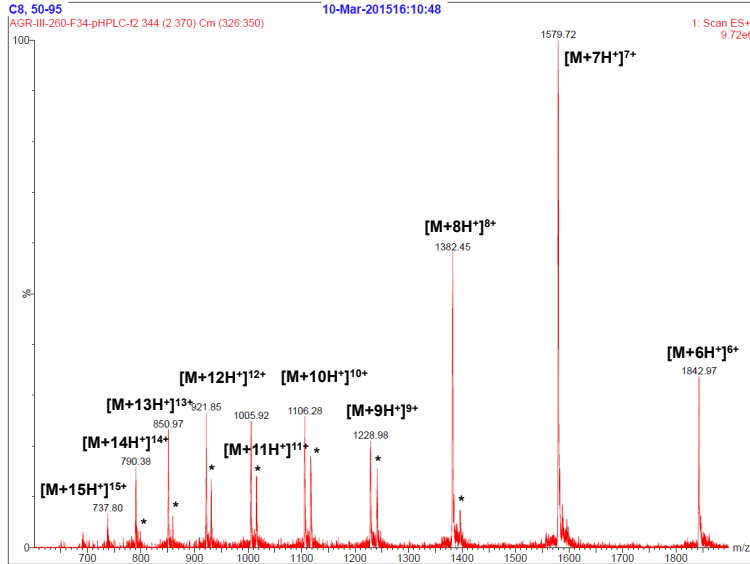

**Figure 1.16C** ESI-MS (+) of peptide 14.  $M = C_{498}H_{783}N_{131}O_{143}S_5$ . ESI calculated for  $[M+6H]^{6+}$   $m/z$ : 1843.31, found: 1842.97;  $[M+7H]^{7+}$   $m/z$ : 1580.12, found: 1579.72;  $[M+8H]^{8+}$   $m/z$ : 1382.74, found: 1382.45;  $[M+9H]^{9+}$   $m/z$ : 1229.21, found: 1228.98;  $[M+10H]^{10+}$   $m/z$ : 1106.39, found: 1106.28;  $[M+11H]^{11+}$   $m/z$ : 1005.90, found: 1005.92;  $[M+12H]^{12+}$   $m/z$ : 922.16, found: 921.85;  $[M+13H]^{13+}$   $m/z$ : 851.30, found: 850.97;  $[M+14H]^{14+}$   $m/z$ : 790.57, found: 790.38;  $[M+15H]^{15+}$   $m/z$ : 737.93, found: 737.80. \* indicates presence of a TFA adduct.

Compound (15).

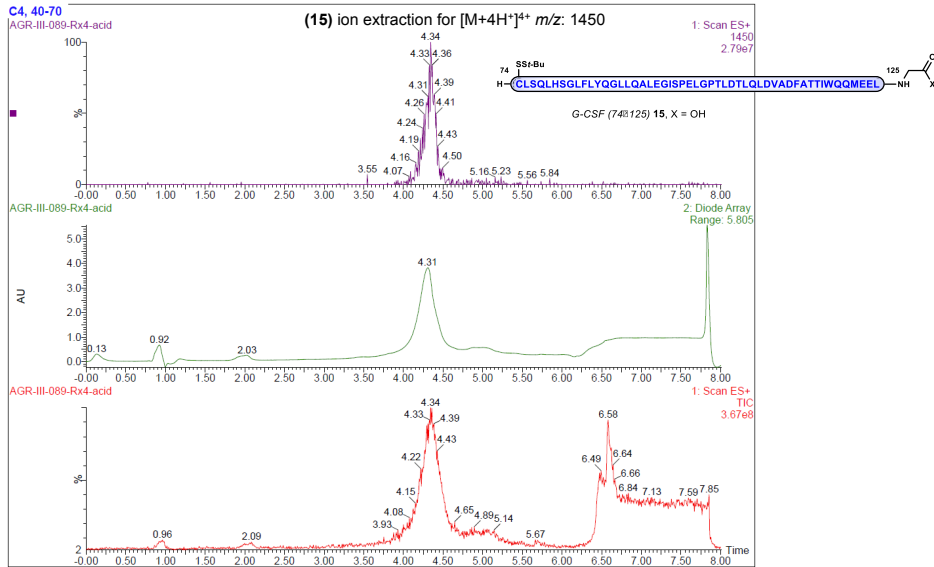

**Figure 1.17A** Top: ESI (+), ion extraction for  $[M+4H]^{4+}$   $m/z$ : 1450. Middle: UV Trace from UPLC-MS analysis of purified peptide 15; gradient of 40% to 70% solvent B over 6 min at a flow rate of 0.3 mL/min, Acquity UPLC BEH C4 analytical column. Bottom: ESI-MS (+) TIC.

Compound (15).

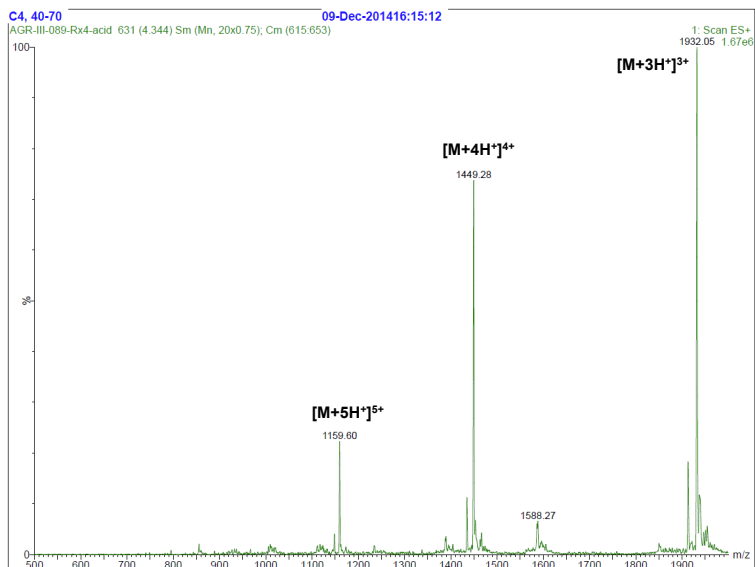

Figure 1.17B ESI-MS (+) of peptide 15.  $M = C_{261}H_{409}N_{67}O_{81}S_3$ . ESI calculated for  $[M+3H]^{5+}$   $m/z$ : 1932.23, found: 1923.05;  $[M+4H]^{5+}$   $m/z$ : 1449.43, found: 1449.28;  $[M+5H]^{5+}$   $m/z$ : 1159.74, found: 1159.60.

Compound (22).

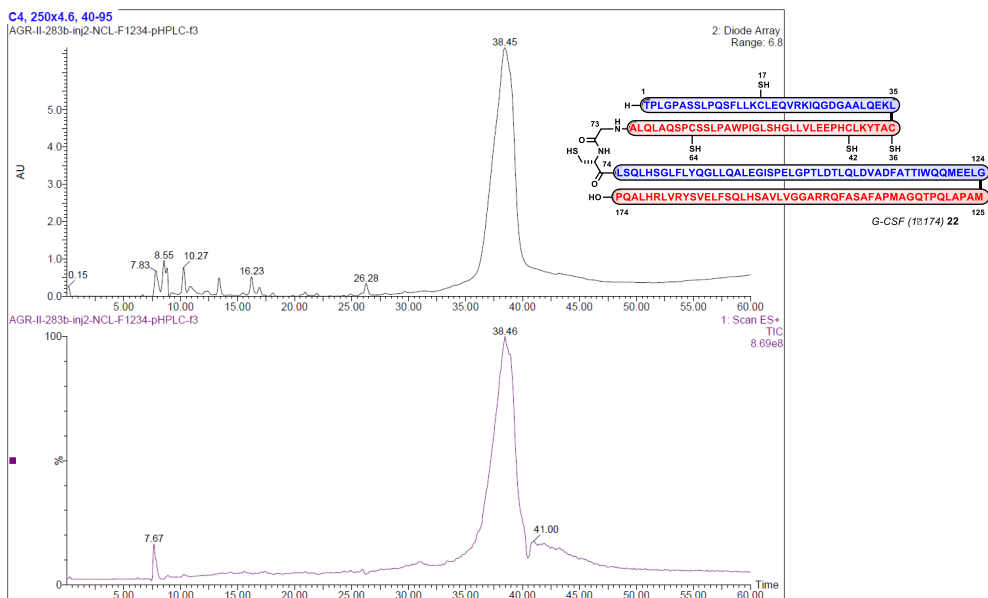

Figure 1.18A Top: UV Trace from LC-MS analysis of linear G-CSF 22; gradient of 40% to 95% solvent B over 60 min at a flow rate of 0.2 mL/min, Higgins C4 semi-preparative column. Bottom: ESI-MS (+) TIC.

Compound (22).

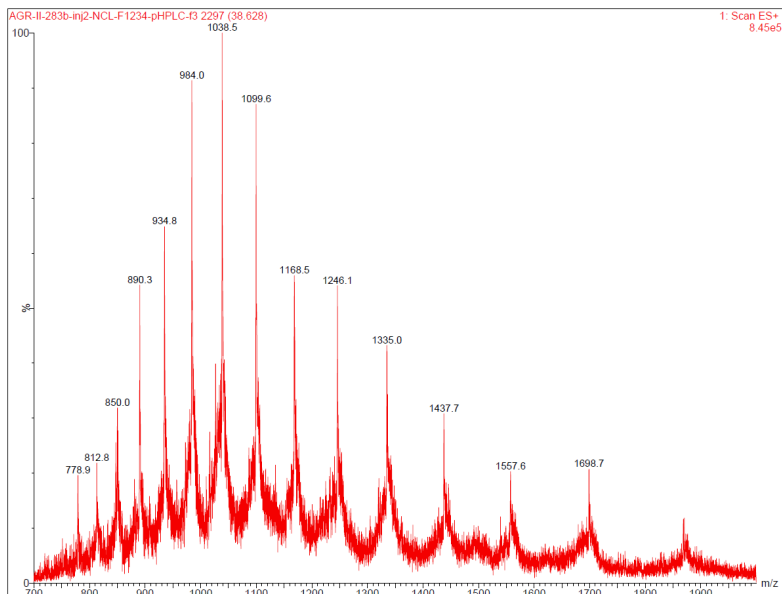

**Figure 1.18B** ESI-MS (+) of linear G-CSF **22**.  $M = C_{840}H_{1334}N_{222}O_{242}S_8$ . ESI calculated for  $[M+11H]^{11+}$   $m/z$ : 1698.4, found: 1698.7;  $[M+12H]^{12+}$   $m/z$ : 1557.0, found: 1557.6;  $[M+13H]^{13+}$   $m/z$ : 1437.3, found: 1437.7;  $[M+14H]^{14+}$   $m/z$ : 1334.7, found: 1335.0;  $[M+15H]^{15+}$   $m/z$ : 1245.8, found: 1246.1;  $[M+16H]^{16+}$   $m/z$ : 1168.0, found: 1168.5;  $[M+17H]^{17+}$   $m/z$ : 1099.3, found: 1099.6;  $[M+18H]^{18+}$   $m/z$ : 1038.3, found: 1038.5;  $[M+19H]^{19+}$   $m/z$ : 983.7, found: 984.0;  $[M+20H]^{20+}$   $m/z$ : 934.6, found: 934.8;  $[M+21H]^{21+}$   $m/z$ : 890.1, found: 890.3;  $[M+22H]^{22+}$   $m/z$ : 849.7, found: 850.0;  $[M+23H]^{23+}$   $m/z$ : 812.8, found: 812.8;  $[M+24H]^{24+}$   $m/z$ : 779.0, found: 778.9.

Compound (2a).  
(crude in  
folding buffer)  
UPLC-MS

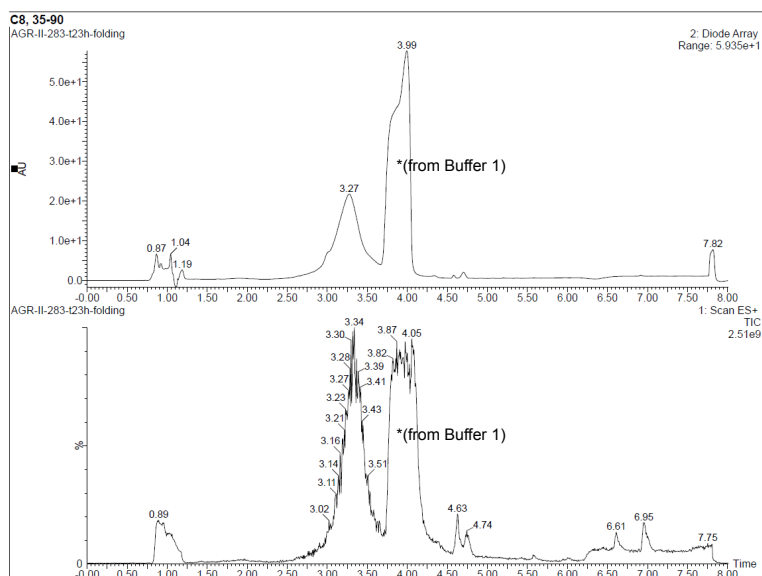

**Figure 1.19A Top:** UV Trace from UPLC-MS analysis of crude G-CSF **2a** in folding buffer at  $t = 23h$ ; gradient of 35% to 90% solvent B over 6 min at a flow rate of 0.3 mL/min, Acquity UPLC BEH C8 analytical column. **Bottom:** ESI-MS (+) TIC.



Compound (2a)  
(crude in  
folding buffer)  
UPLC-MS

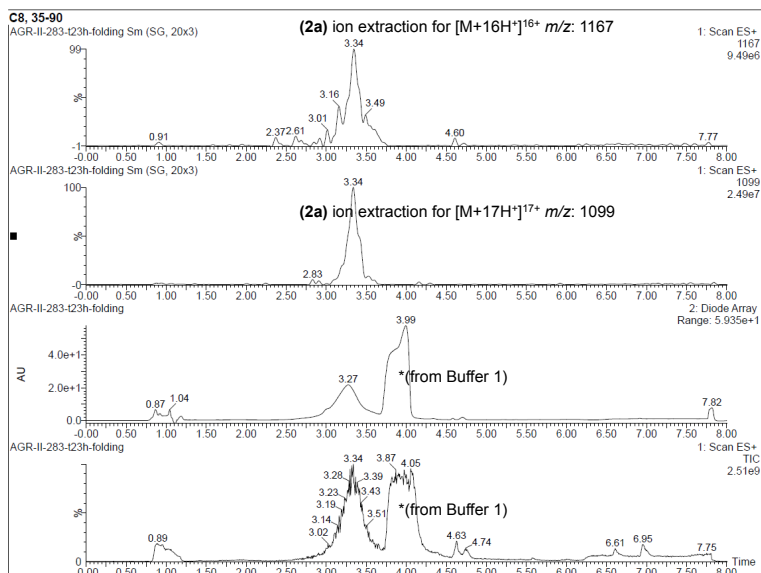

**Figure 1.19B** Top: ESI-MS (+) TIC, ion extraction for  $[M+16H]^{16+}$   $m/z$ : 1167. Middle (1): ESI-MS (+) TIC, ion extraction for  $[M+17H]^{17+}$   $m/z$ : 1099. Middle (2): UV Trace from UPLC-MS analysis of crude G-CSF 2a in folding buffer at  $t = 23h$ ; gradient of 35% to 90% solvent B over 6 min at a flow rate of 0.3 mL/min, Acquity UPLC BEH C8 analytical column. Bottom: ESI-MS (+) TIC.

Comparison  
(22) and  
crude (2a).  
UPLC-MS

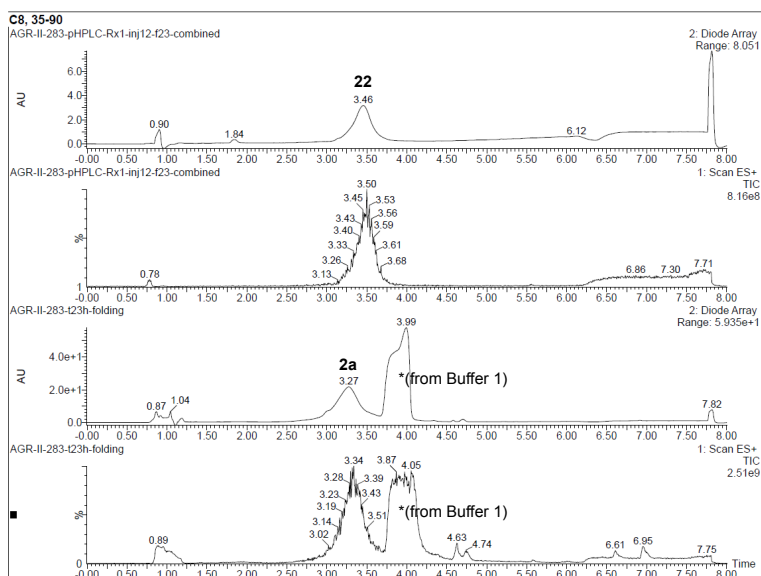

**Figure 1.19C** Top: UV Trace from UPLC-MS analysis of pure G-CSF 22; gradient of 35% to 90% solvent B over 6 min at a flow rate of 0.3 mL/min, Acquity UPLC BEH C8 analytical column. Middle (1): ESI-MS (+) TIC. Middle (2): UV Trace from UPLC-MS analysis of crude G-CSF 2a in folding buffer at  $t = 23h$ ; gradient of 35% to 90% solvent B over 6 min at a flow rate of 0.3 mL/min, Acquity UPLC BEH C8 analytical column. Bottom: ESI-MS (+) TIC.

Comparison  
(22) and  
crude (2a).  
LR-MS

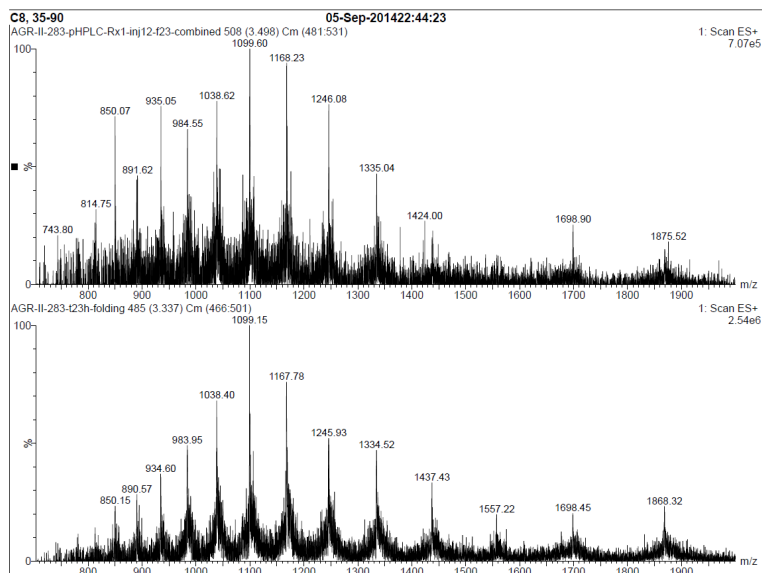

Figure 1.20A Top: ESI-MS (+) TIC of pure G-CSF 22 (non-folded). Bottom: ESI-MS (+) TIC of G-CSF 2a (folded) in crude folding buffer.

Comparison  
(22) and  
crude (2a).  
LR-MS  
(smoothened)

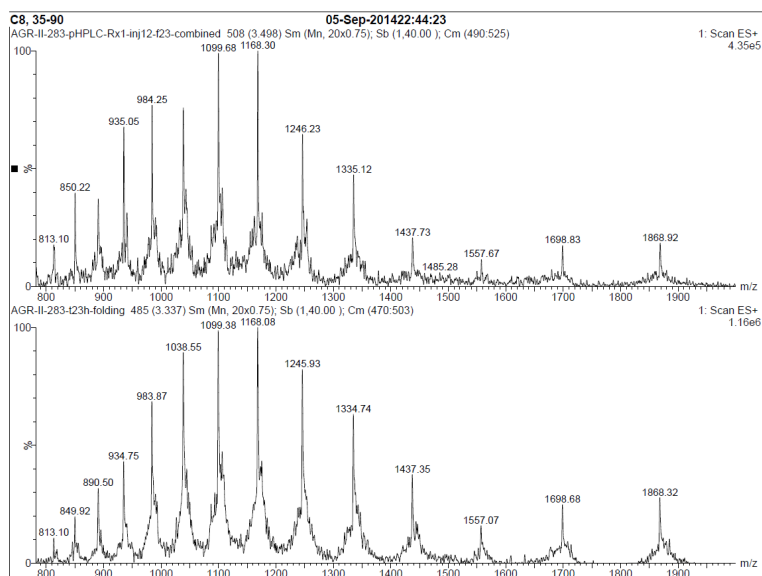

Figure 1.20B Top: ESI-MS (+) TIC of pure G-CSF 22 (non-folded). Bottom: ESI-MS (+) TIC of G-CSF 2a (folded) in crude folding buffer. (data smoothened low resolution data supports decrease in mass, see also HRMS)

Compound  
**(2b)** (pure)  
recombinant  
G-CSF in  
folding  
buffer  
  
LC-MS

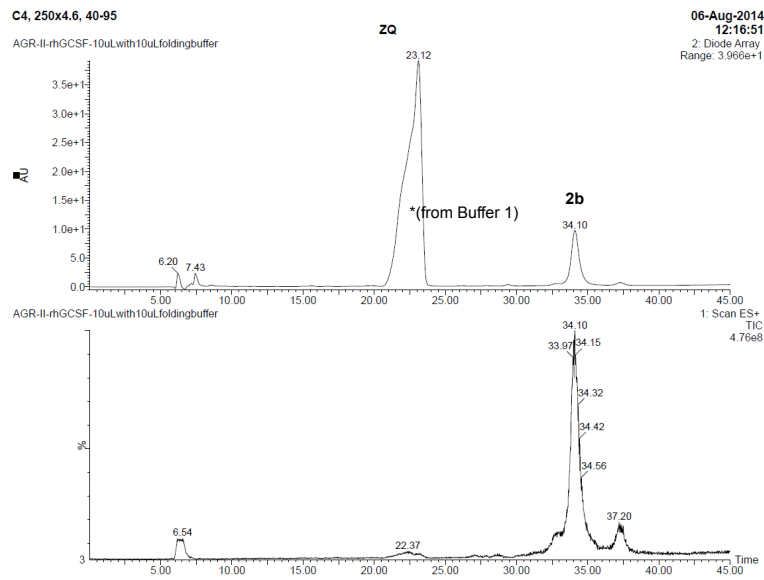

Figure 1.21A Top: UV Trace from LC-MS analysis of recombinant G-CSF **2b**; gradient of 40% to 95% solvent B over 60 min at a flow rate of 0.5 mL/min, Higgins C4 semi-preparative column. Bottom: ESI-MS (+) TIC.

Comparison  
**(2b)** (pure)  
**(2a)** (crude)  
**(2a)** (purify)  
  
LC-MS

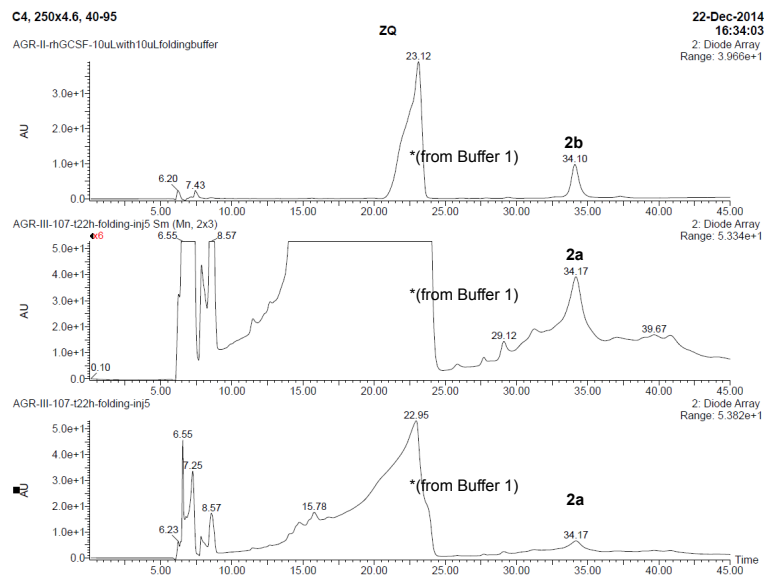

Figure 1.21B Top: UV Trace from LC-MS analysis of recombinant G-CSF **2b** ( $t = 34.10$  min); gradient of 40% to 95% solvent B over 60 min at a flow rate of 0.5 mL/min, Higgins C4 semi-preparative column. Middle: UV Trace from LC-MS analysis of crude G-CSF **2a** ( $t = 34.17$  min) after folding; same system as above. Bottom: Sample injection for purification.

Comparison  
**(2b)** (pure)  
**(2a)** (crude)  
**(2a)** (pure)

LC-MS

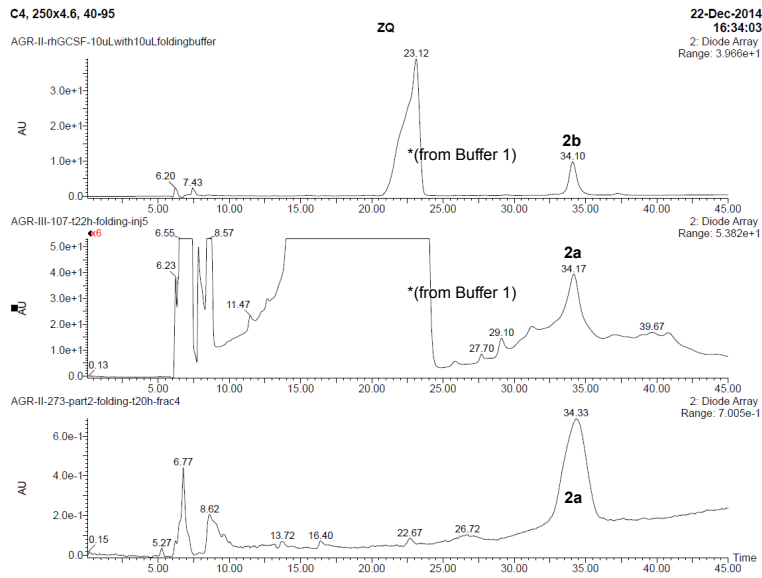

**Figure 1.21C Top:** UV Trace from LC-MS analysis of recombinant G-CSF **2b** (t = 34.10 min); gradient of 40% to 95% solvent B over 60 min at a flow rate of 0.5 mL/min, Higgins C4 semi-preparative column. **Middle:** UV Trace from LC-MS analysis of crude G-CSF **2a** (t = 34.17 min) after folding; same system as above. **Bottom:** Reinjection of pure fractions after collection, pure G-CSF **2a** (t = 34.33 min); same system as above.

Compound **(2a)**.  
 (purification)

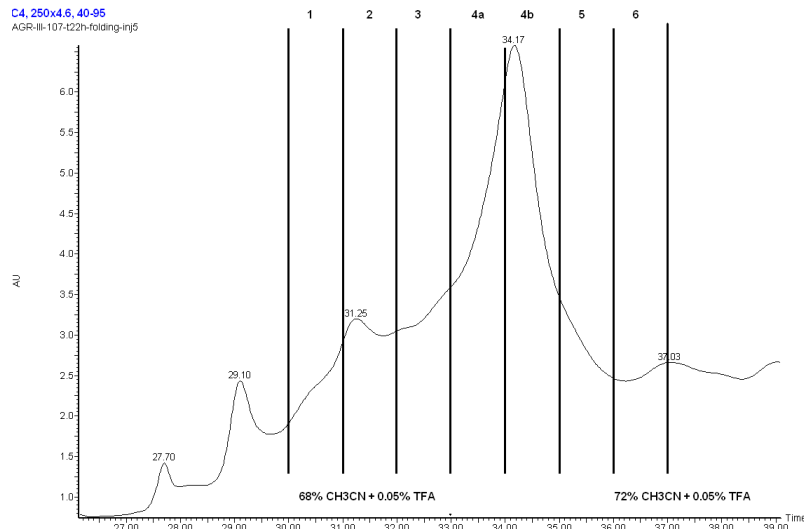

**Figure 1.22** UV Trace from HPLC purification of G-CSF **2a** (range 26 to 39 min); gradient of 40% to 95% solvent B over 60 min at a flow rate of 0.5 mL/min, Higgins C4 semi-preparative column. Seven fractions (1, 2, 3, 4a, 4b, 5 and 6) were collected (each approx. 0.5 mL of 70:30 CH<sub>3</sub>CN / H<sub>2</sub>O with 0.05% TFA neutralized with 0.1 mL with 1.0 M HEPES). Fractions 4a and 4b exhibited the highest activity relative to the others in the NFS-60 cellular assay. Isolated yield is based upon combined recovery from collection of fractions 4a and 4b.

Compound (2a).  
(purification)

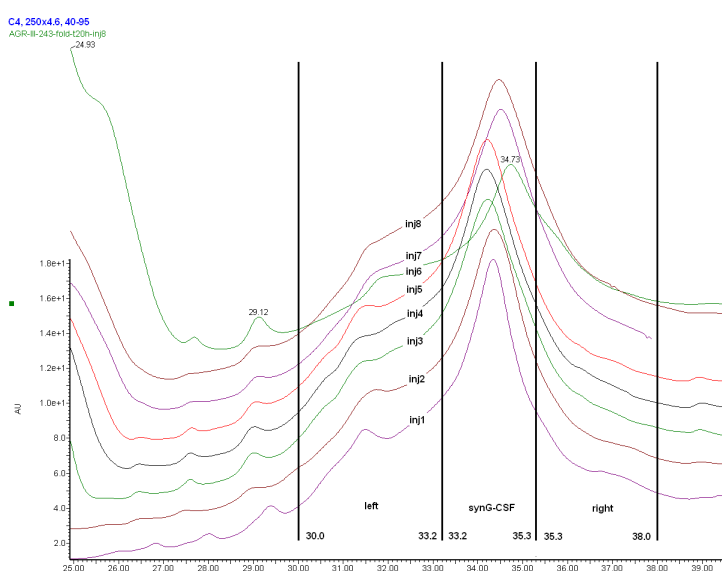

Figure 1.23 UV Traces from HPLC purification (8 injections) of G-CSF 2a (range 25 to 39 min); gradient of 40% to 95% solvent B over 60 min at a flow rate of 0.5 mL/min, Higgins C4 semi-preparative column.

Compound (2a).

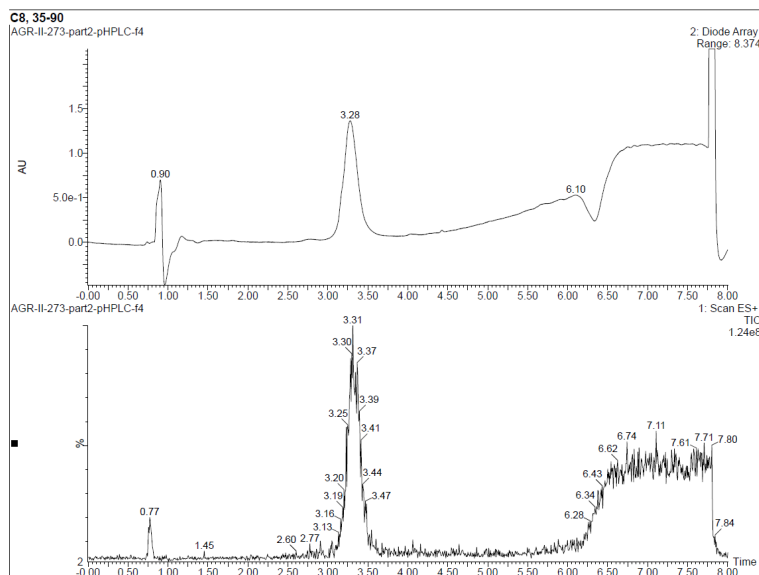

Figure 1.24A Top: UV Trace from UPLC-MS analysis of purified G-CSF 2a; gradient of 35% to 90% solvent B over 6 min at a flow rate of 0.3 mL/min, Acquity UPLC BEH C8 analytical column. Bottom: ESI-MS (+) TIC.

Comparison  
**(22)** (pure)  
**(2a)** (pure)  
 UPLC-MS

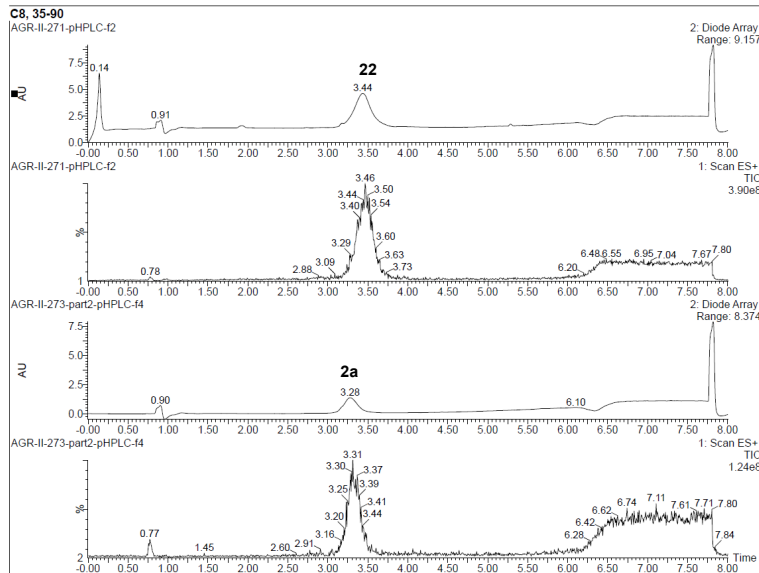

**Figure 1.24B Top:** UV Trace from UPLC-MS analysis of purified G-CSF **22** ( $t = 3.44$  min); gradient of 35% to 90% solvent B over 6 min at a flow rate of 0.3 mL/min, Acquity UPLC BEH C8 analytical column. **Middle (1):** ESI-MS (+) TIC. **Middle (2):** UV Trace from UPLC-MS analysis of purified G-CSF **2a** ( $t = 3.28$  min); same system as above. **Bottom:** ESI-MS (+) TIC.

Comparison  
**(22)** (pure)  
**(2a)** (pure)  
 LC-MS

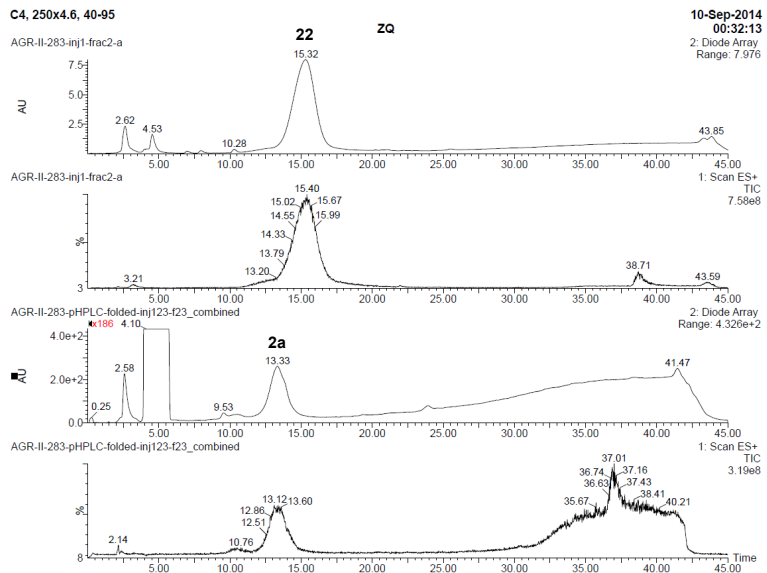

**Figure 1.25 Top:** UV Trace from LC-MS analysis of purified G-CSF **22** ( $t = 15.32$  min); gradient of 40% to 95% solvent B over 60 min at a flow rate of 0.2 mL/min, X-Bridge C8 analytical column. **Middle (1):** ESI-MS (+) TIC. **Middle (2):** UV Trace from LC-MS analysis of purified G-CSF **2a** ( $t = 13.33$  min); same system as above. **Bottom:** ESI-MS (+) TIC.

Compound (22). 10SEPT2014 agr11283f2 #3848-39! 28.32-29.04 AV:  
HRMS F: FTMS + p NSI Full ms [300.00-2000.00]

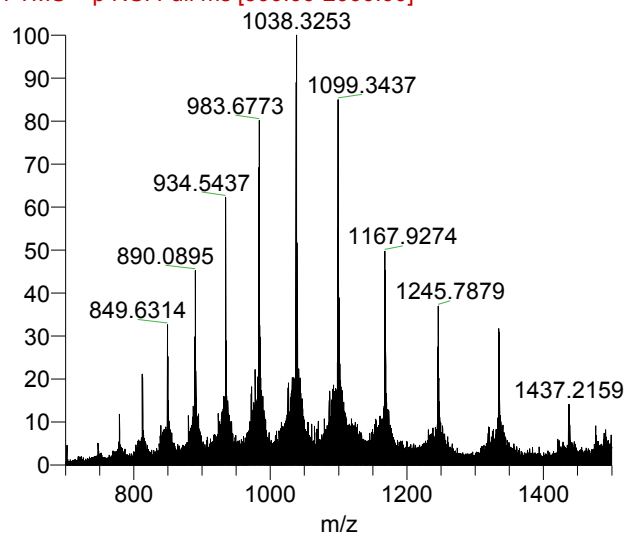

Figure 1.26 High resolution ESI-MS (+) of linear G-CSF 22. M = C<sub>840</sub>H<sub>1334</sub>N<sub>222</sub>O<sub>242</sub>S<sub>8</sub>. See Figure 1.28.

Compound (2a). 10SEPT2014 arg11283foldedfr23co #3749-3825 RT:  
HRMS F: FTMS + p NSI Full ms [300.00-2000.00]

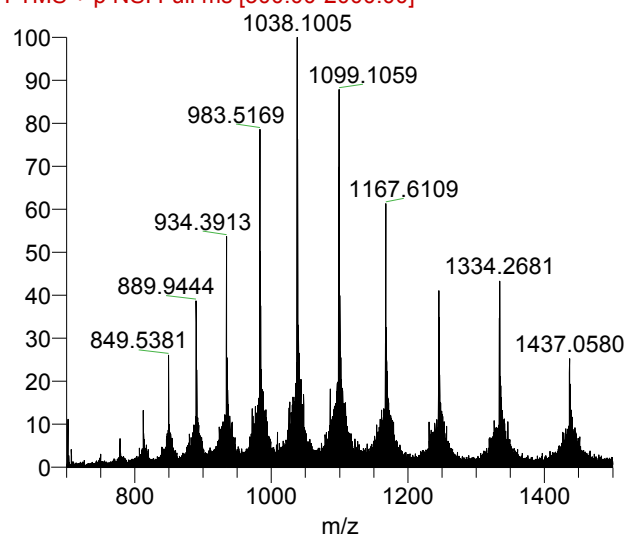

Figure 1.27 High resolution ESI-MS (+) of linear G-CSF 2a. M = C<sub>840</sub>H<sub>1330</sub>N<sub>222</sub>O<sub>242</sub>S<sub>8</sub>. See Figure 1.28.

Comparison  
HRMS (22) and (2a).

| G-CSF (22) |        |                |                   | AGR-II-283-comb. |        |                |                   |
|------------|--------|----------------|-------------------|------------------|--------|----------------|-------------------|
| Found      | Charge | # of H+        | (M+1H+)+1         | Found            | Charge | # of H+        | (M+1H+)+1         |
| 1437.21478 | 13     | 13.1033        | 18671.6968        | 1437.05813       | 13     | 13.1033        | 18669.6603        |
| 1334.69973 | 14     | 14.1113        | 18672.6929        | 1334.26812       | 14     | 14.1113        | 18666.6504        |
| 1245.72040 | 15     | 15.1192        | 18671.6947        | 1245.51803       | 15     | 15.1192        | 18668.6592        |
| 1167.92581 | 16     | 16.1272        | 18671.6937        | 1167.61089       | 16     | 16.1272        | 18666.6550        |
| 1099.40185 | 17     | 17.1351        | 18673.7043        | 1098.98785       | 17     | 17.1351        | 18666.6663        |
| 1038.26919 | 18     | 18.1430        | 18671.7103        | 1038.10047       | 18     | 18.1430        | 18668.6734        |
| 983.72884  | 19     | 19.1510        | 18672.7049        | 983.51685        | 19     | 19.1510        | 18668.6771        |
| 934.59343  | 20     | 20.1589        | 18672.7176        | 934.39127        | 20     | 20.1589        | 18668.6744        |
| 890.13666  | 21     | 21.1669        | 18672.7109        | 889.94443        | 21     | 21.1669        | 18668.6741        |
| 849.67613  | 22     | 22.1748        | 18671.7080        | 849.53810        | 22     | 22.1748        | 18668.6713        |
| 812.86453  | 23     | 23.1828        | 18673.7093        | 812.73301        | 23     | 23.1828        | 18670.6844        |
| 778.95388  | 24     | 24.1907        | 18671.7103        | 778.74310        | 24     | 24.1907        | 18666.6516        |
|            |        | <b>average</b> | <b>18672.4312</b> |                  |        | <b>average</b> | <b>18668.3951</b> |

Figure 1.28 Left: HRMS data from purified G-CSF 22, (18,672.4312 Da) Right: HRMS data from purified G-CSF 2a, (18,668.3951 Da).  $\Delta = 4.04$  (accounts for disulfide formations, 4 H)

Compound (17).

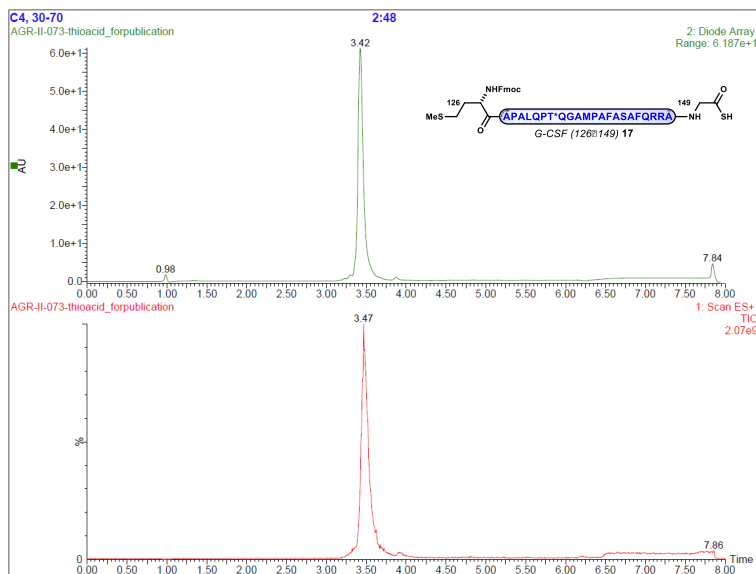

Figure 1.29A Top: UV Trace from UPLC-MS analysis of purified peptide 17; gradient of 30% to 70% solvent B over 6 min at a flow rate of 0.3 mL/min, Acquity UPLC BEH C4 analytical column. Bottom: ESI-MS (+) TIC.



Compound (17).

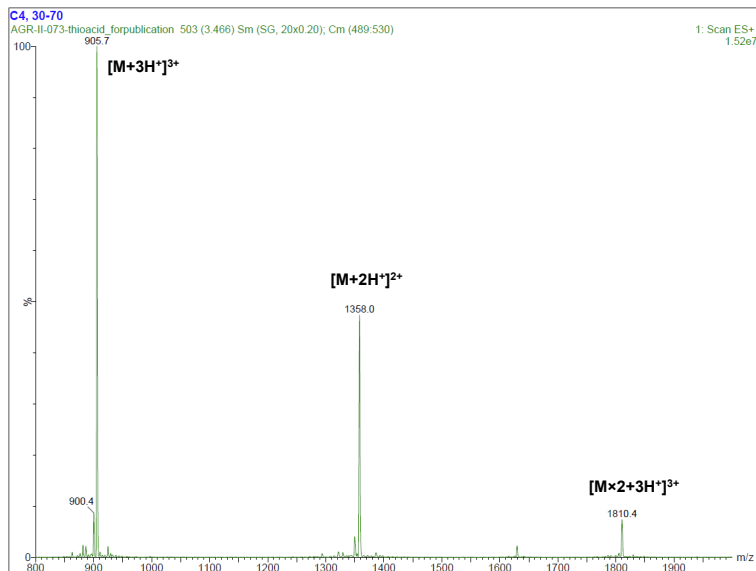

Figure 1.29B ESI-MS (+) of peptide 17.  $M = C_{123}H_{181}N_{33}O_{31}S_3$ . ESI calculated for  $[M+2+3H]^3+$   $m/z$ : 1810.5, found: 1810.4;  $[M+2H]^2+$   $m/z$ : 1358.1, found: 1358.0;  $[M+3H]^3+$   $m/z$ : 905.7, found: 905.7.

Compound (18).

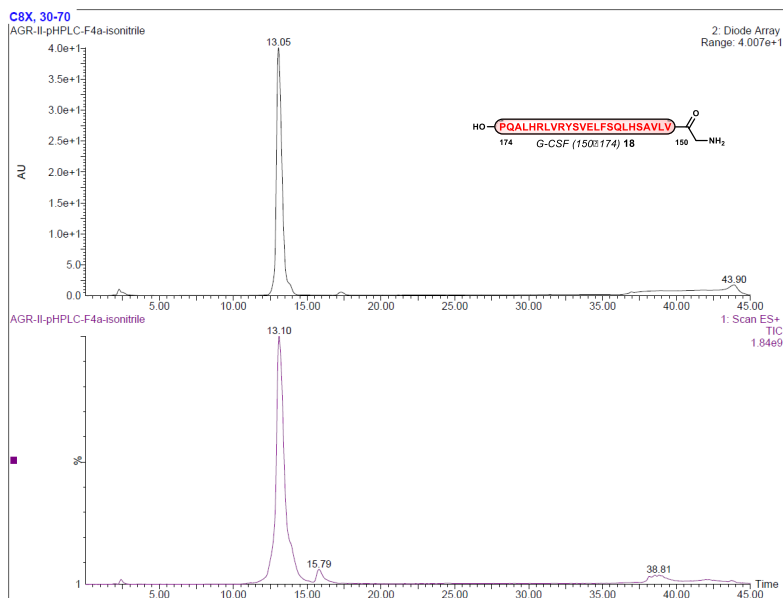

Figure 1.30A Top: UV Trace from LC-MS analysis of HPLC purified peptide 18; gradient of 30% to 70% solvent B over 30 min at a flow rate of 0.2 mL/min, X-Bridge C8 analytical column.

Compound (18).

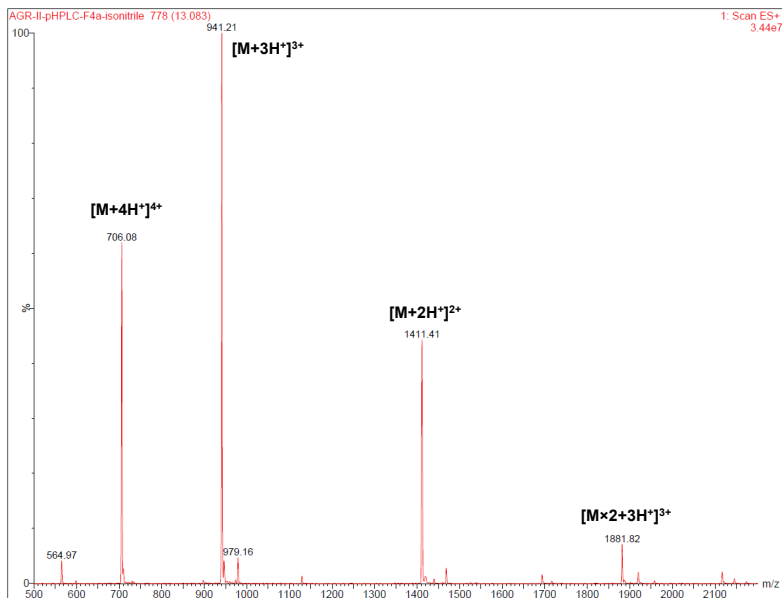

**Figure 1.30B** ESI-MS (+) of peptide 18.  $M = C_{126}H_{207}N_{37}O_{34}$ . ESI calculated for  $[M+2+3H]^{3+}$   $m/z$ : 1881.20, found: 1881.82;  $[M+2H]^{2+}$   $m/z$ : 1411.16, found: 1411.41;  $[M+3H]^{3+}$   $m/z$ : 941.11, found: 941.21;  $[M+4H]^{4+}$   $m/z$ : 706.08, found: 706.08.

Compound (13).  
(from coupling)

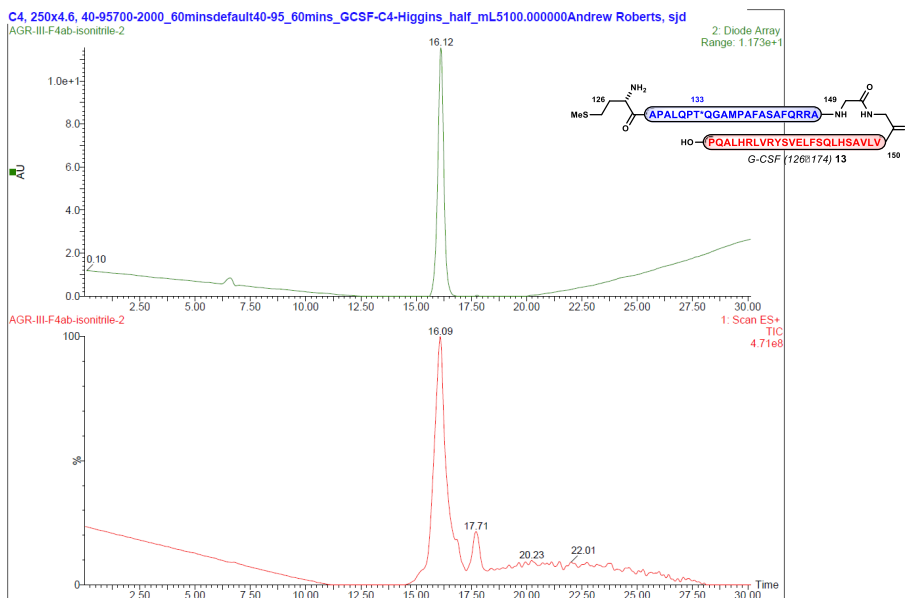

**Figure 1.31A Top:** UV Trace from LC-MS analysis of HPLC purified peptide 13; gradient of 30% to 70% solvent B over 30 min at a flow rate of 0.2 mL/min, X-Bridge C8 analytical column.

Compound (13).  
(from coupling)

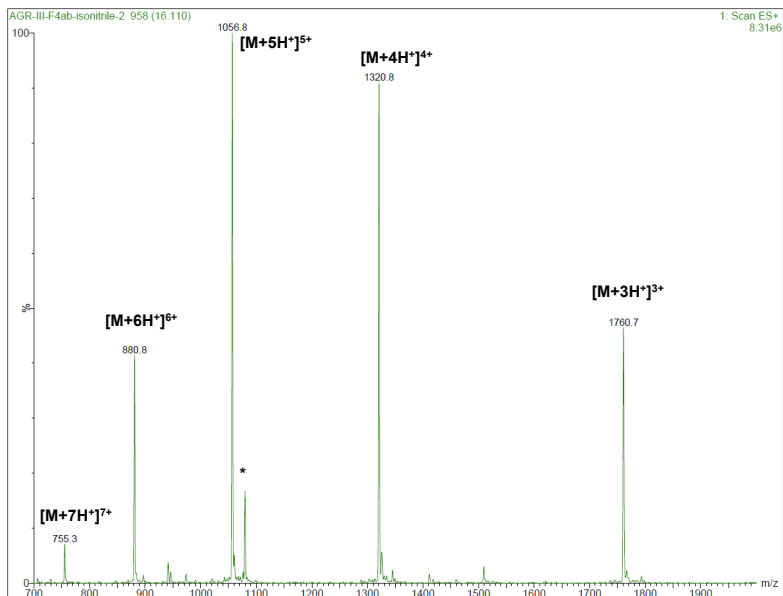

**Figure 1.31B** ESI-MS (+) of peptide **13**.  $M = C_{237}H_{376}N_{70}O_{63}S_2$ . ESI calculated for  $[M+3H]^{3+}$   $m/z$ : 1760.4, found: 1760.7;  $[M+4H]^{4+}$   $m/z$ : 1320.6, found: 1320.8;  $[M+5H]^{5+}$   $m/z$ : 1056.6, found: 1056.8;  $[M+6H]^{6+}$   $m/z$ : 880.7, found: 880.8;  $[M+7H]^{7+}$   $m/z$ : 750.0, found: 750.3. \* indicates presence of TFA adduct in spectrum.

Compound (19)

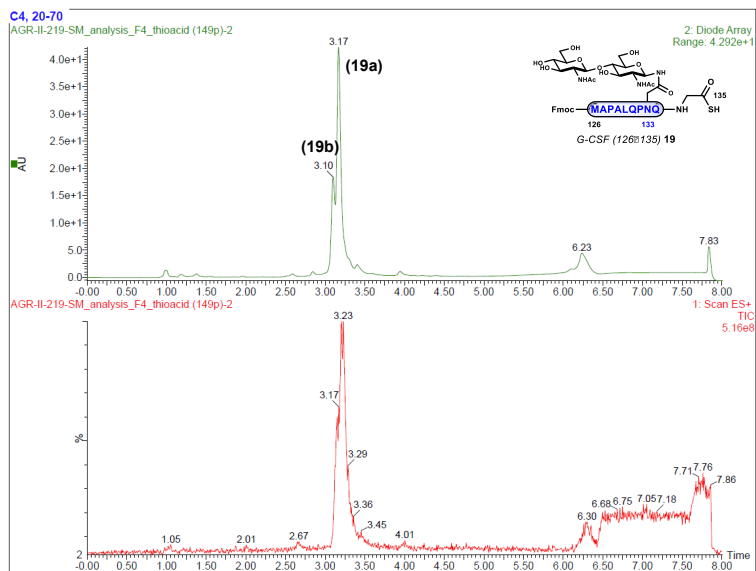

**Figure 1.32A Top:** UV Trace from UPLC-MS analysis of purified peptide **19a** containing **19b**; gradient of 20% to 70% solvent B over 6 min at a flow rate of 0.3 mL/min, Acquity UPLC BEH C4 analytical column. **Bottom:** ESI-MS (+) TIC.

Compound (19)

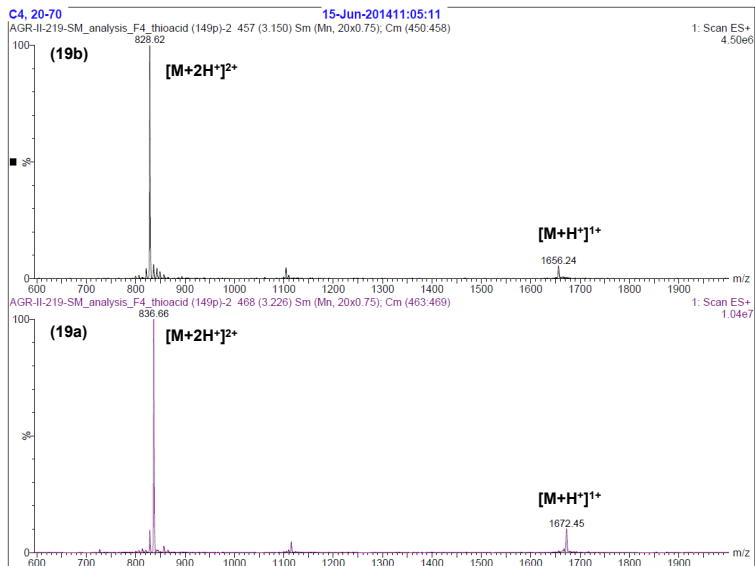

**Figure 1.32B Top:** ESI-MS (+) of peptide **19b**.  $M = C_{77}H_{107}N_{15}O_{26}S_1$ . ESI calculated for  $[M+H]^+$   $m/z$ : 1655.82, found: 1656.24;  $[M+2H]^{2+}$   $m/z$ : 828.41, found: 828.62. **Bottom:** ESI-MS (+) of peptide **19a**.  $M = C_{74}H_{107}N_{15}O_{25}S_2$ . ESI calculated for  $[M+H]^+$   $m/z$ : 1671.88, found: 1672.45;  $[M+2H]^{2+}$   $m/z$ : 836.44, found: 836.66.

Compound (19)  
(purity analysis)

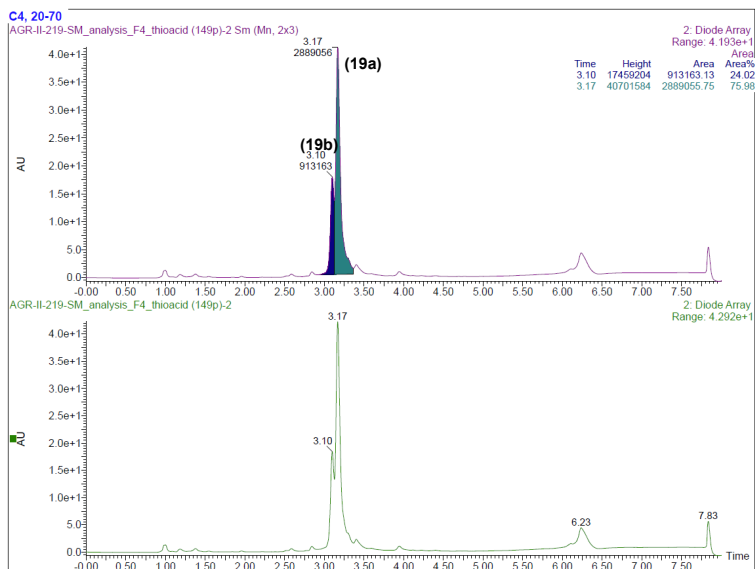

**Figure 1.32C Top:** Integrated UV Trace from UPLC-MS analysis of purified peptide **19a** (75% AUC) containing **19b** (25% AUC). **Bottom:** UV Trace from UPLC-MS analysis of purified peptide **19a** containing **19b**; gradient of 20% to 70% solvent B over 6 min at a flow rate of 0.3 mL/min, Acquity UPLC BEH C4 analytical column.

Compound (19)  
(purity analysis)

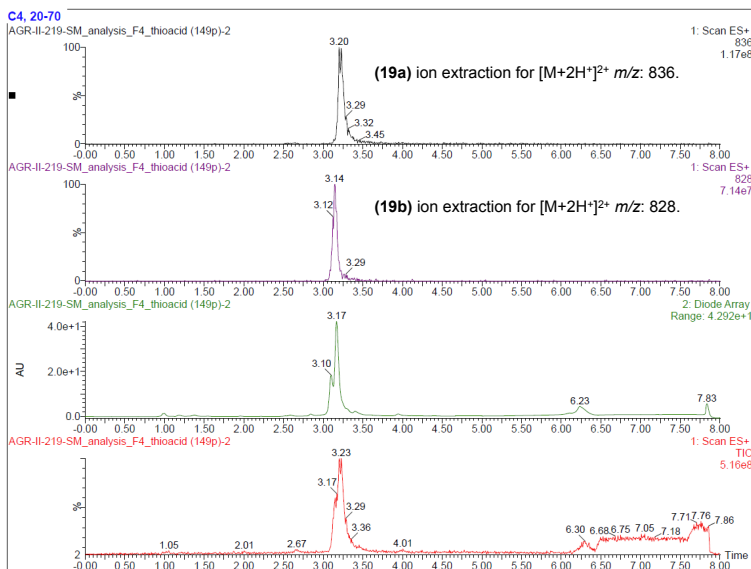

Figure 1.32D Top: ESI (+), ion extraction for  $[M+2H]^{2+}$   $m/z$ : 836 (19a). Middle (1): ESI (+), ion extraction for  $[M+2H]^{2+}$   $m/z$ : 828 (19b). Middle (2): UV Trace from UPLC-MS analysis of purified peptide 19a containing 19b; gradient of 20% to 70% solvent B over 6 min at a flow rate of 0.3 mL/min, Acquity UPLC BEH C4 analytical column. Bottom: ESI-MS (+) TIC.

Compound (20).

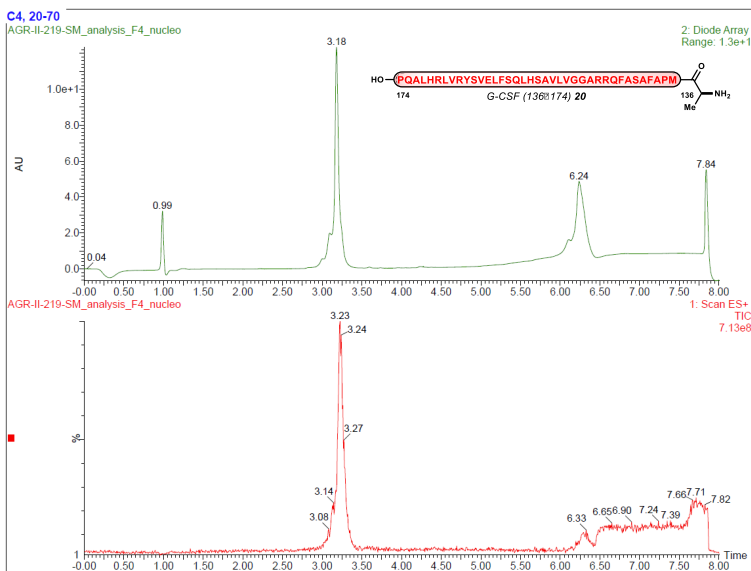

Figure 1.33A Top: UV Trace from UPLC-MS analysis of purified peptide 20; gradient of 20% to 70% solvent B over 6 min at a flow rate of 0.3 mL/min, Acquity UPLC BEH C4 analytical column. Bottom: ESI-MS (+) TIC.

Compound (20).

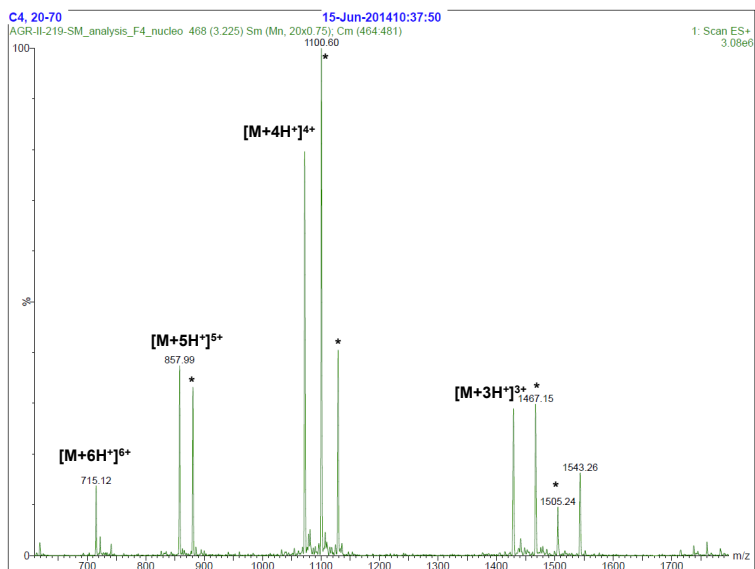

**Figure 1.33B** ESI-MS (+) of peptide **20**.  $M = C_{194}H_{306}N_{58}O_{50}S$ . ESI calculated for  $[M+3H]^{3+}$   $m/z$ : 1428.67, found: 1428.21;  $[M+4H]^{4+}$   $m/z$ : 1071.76, found: 1072.16;  $[M+5H]^{5+}$   $m/z$ : 857.61, found: 857.99;  $[M+6H]^{6+}$   $m/z$ : 714.84, found: 715.12. \* indicates presence of TFA adduct(s) in spectrum.

Compound (21).  
(crude reaction)

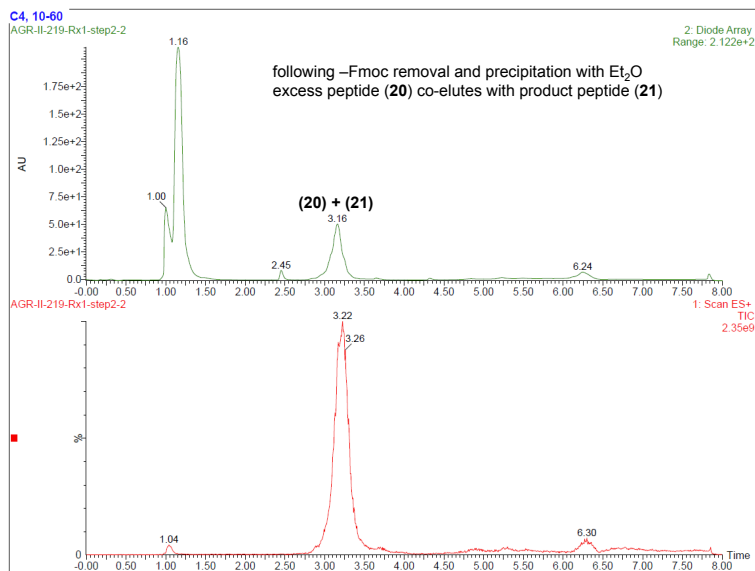

**Figure 1.34A Top**: UV Trace from UPLC-MS analysis of crude reaction to prepare peptide **21**; gradient of 10% to 60% solvent B over 6 min at a flow rate of 0.3 mL/min, Acquity UPLC BEH C4 analytical column. **Bottom**: ESI-MS (+) TIC.

Compound (21).  
(crude reaction)

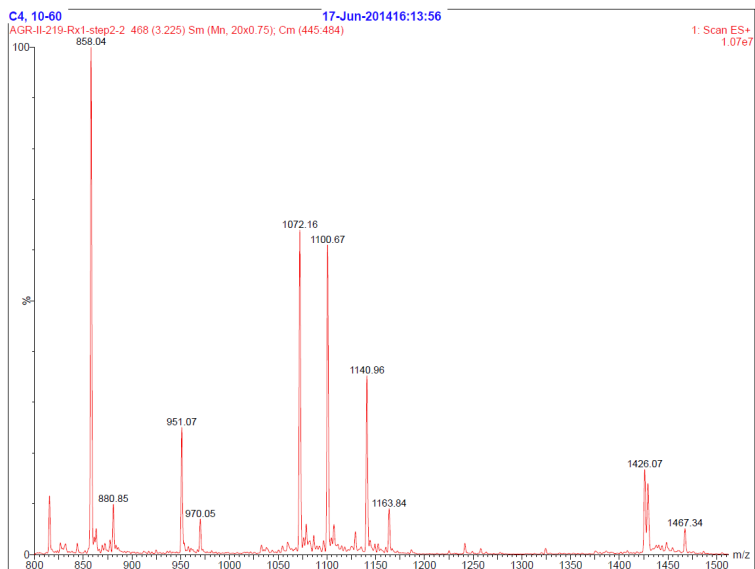

Figure 1.34B ESI-MS (+) of crude reaction mixture to prepare peptide 21.

Compound (21).

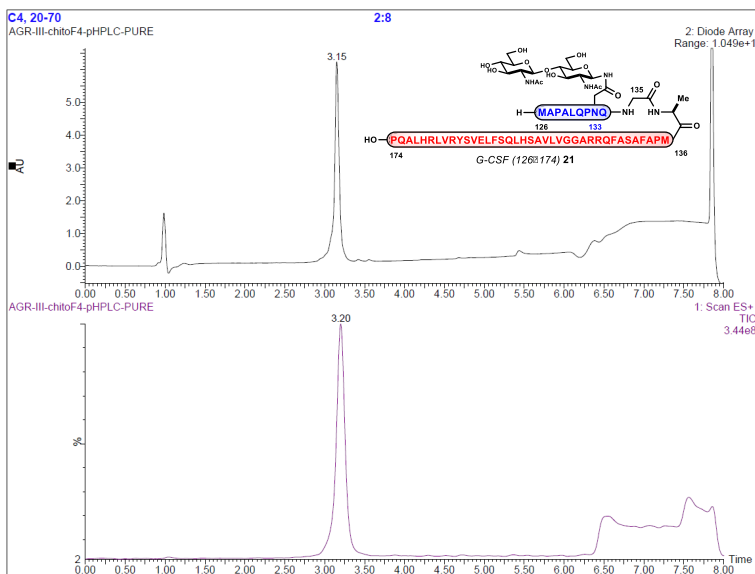

Figure 1.35A Top: UV Trace from UPLC-MS analysis of purified peptide 21; gradient of 20% to 70% solvent B over 6 min at a flow rate of 0.3 mL/min, Acquity UPLC BEH C4 analytical column. Bottom: ESI-MS (+) TIC.

Compound (21).

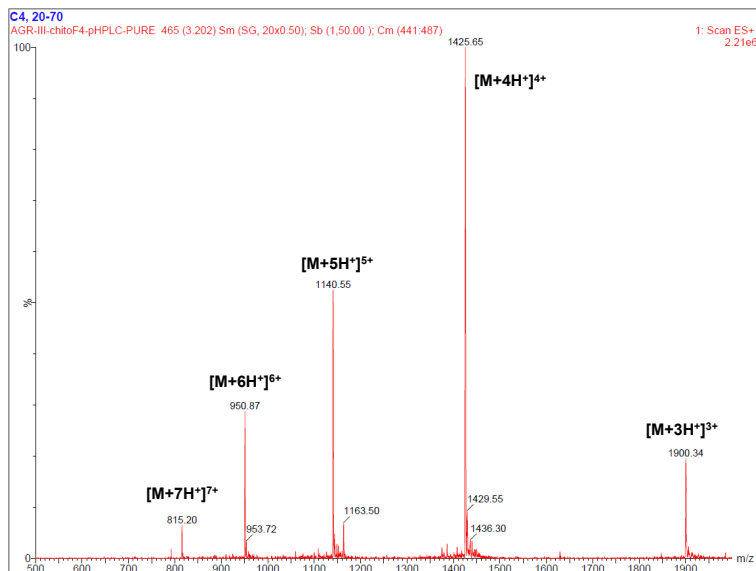

**Figure 1.35B** ESI-MS (+) of peptide 21.  $M = C_{253}H_{401}N_{73}O_{73}S_2$ . ESI calculated for  $[M+3H]^{3+}$   $m/z$ : 1900.19, found: 1900.34;  $[M+4H]^{4+}$   $m/z$ : 1425.40, found: 1425.65;  $[M+5H]^{5+}$   $m/z$ : 1140.52, found: 1140.55;  $[M+6H]^{6+}$   $m/z$ : 950.60, found: 950.87;  $[M+7H]^{7+}$   $m/z$ : 814.94, found: 815.20.

Compound (11).

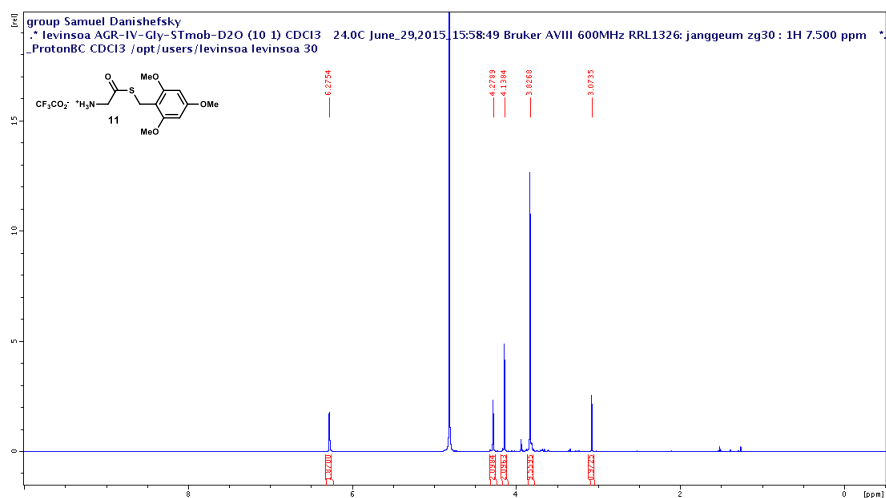

**Figure 1.36A**  $^1H$  NMR spectrum of compound 11 in  $D_2O$ .



Compound (11).

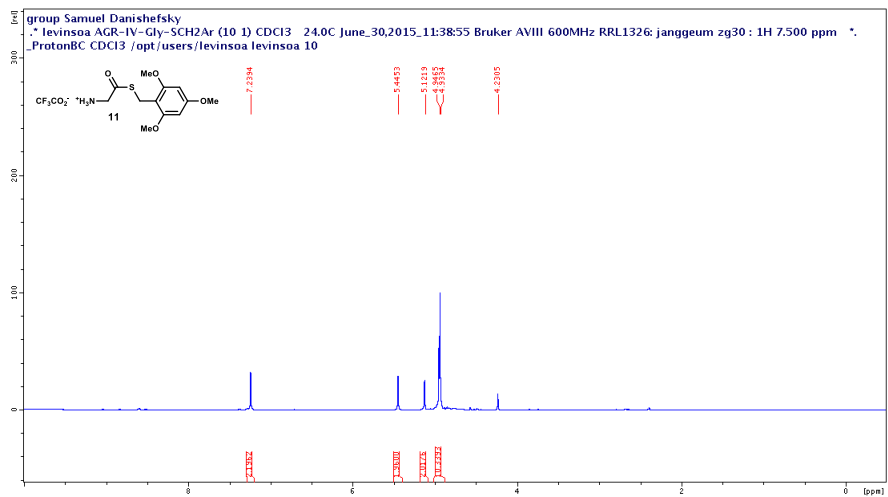

Figure 1.36B <sup>1</sup>H NMR spectrum of compound 11 CDCl<sub>3</sub> with DMSO-*d*<sub>6</sub>.

Compound (11).

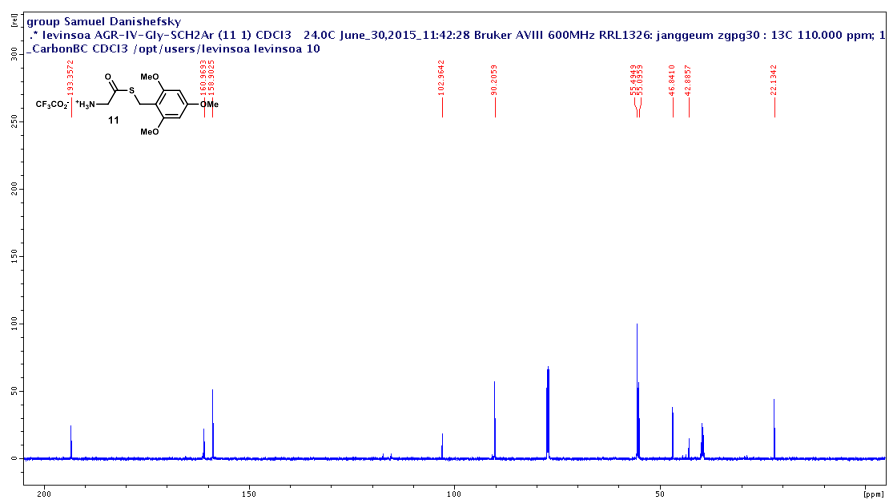

Figure 1.36C <sup>13</sup>C NMR spectrum of compound 11 in CDCl<sub>3</sub> with DMSO-*d*<sub>6</sub>.

Compound (S-1).

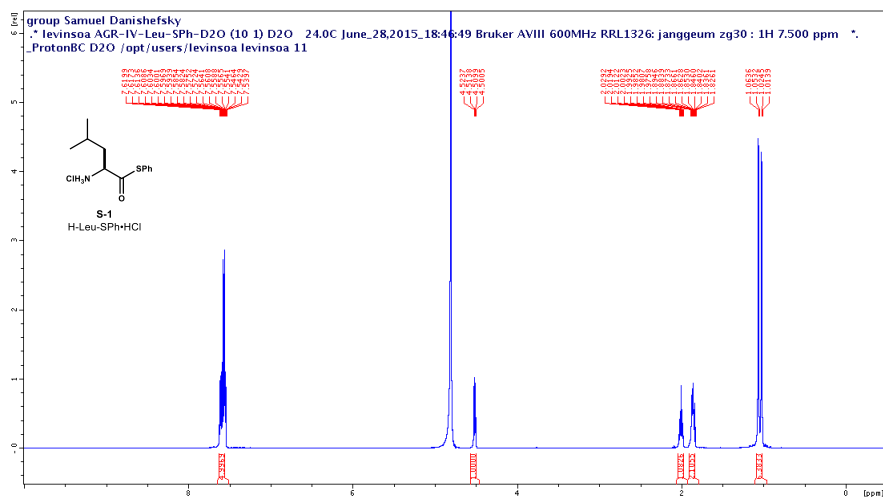

Figure 1.37A <sup>1</sup>H NMR spectrum of compound S-1 in D<sub>2</sub>O.

Compound (S-1).

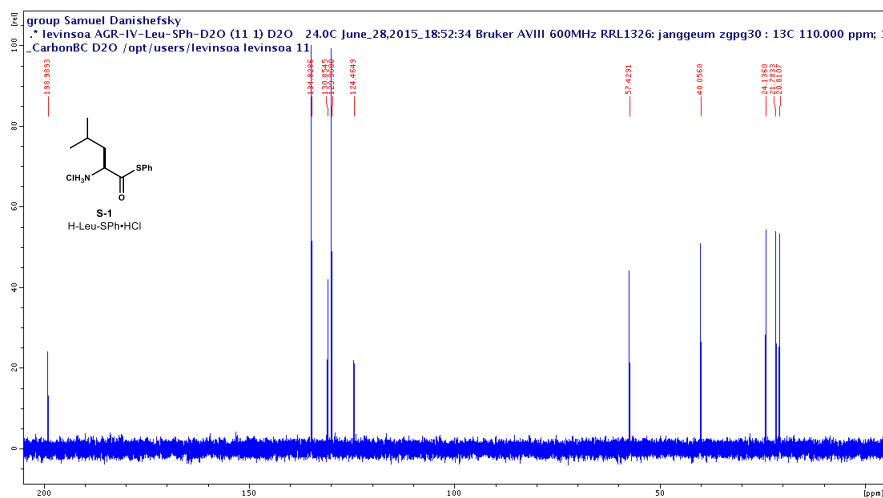

Figure 1.37B <sup>13</sup>C NMR spectrum of compound S-1 in D<sub>2</sub>O.

Compound (S-2).

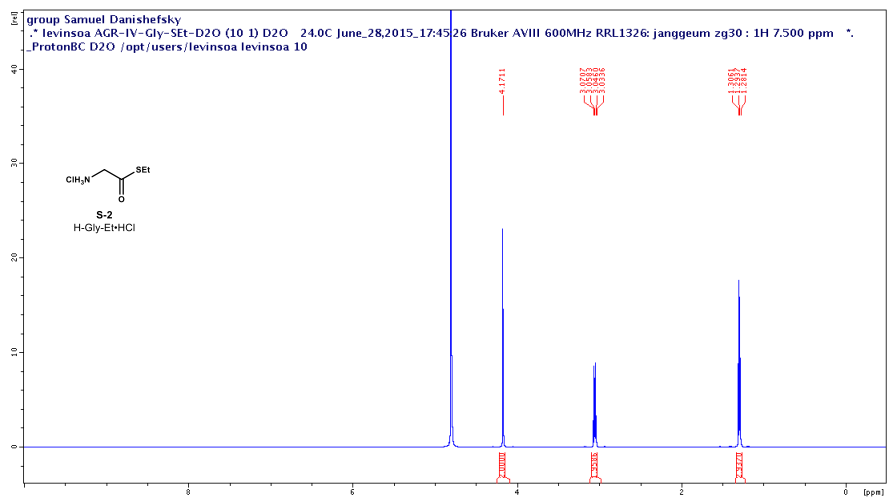

Figure 1.38A <sup>1</sup>H NMR spectrum of compound S-2 in D<sub>2</sub>O.

Compound (S-2).

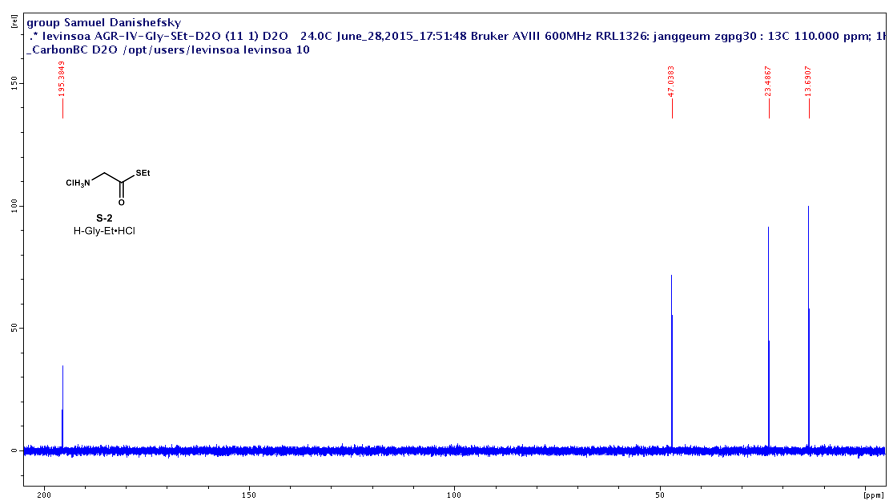

Figure 1.38B <sup>13</sup>C NMR spectrum of compound S-2 in D<sub>2</sub>O.

Compound (S-3).

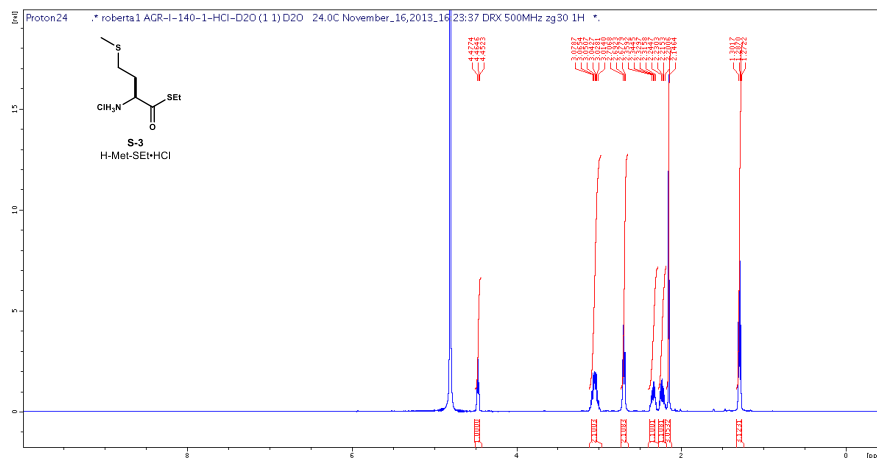

Figure 1.39A <sup>1</sup>H NMR spectrum of compound S-3 in D<sub>2</sub>O.

Compound (S-3).

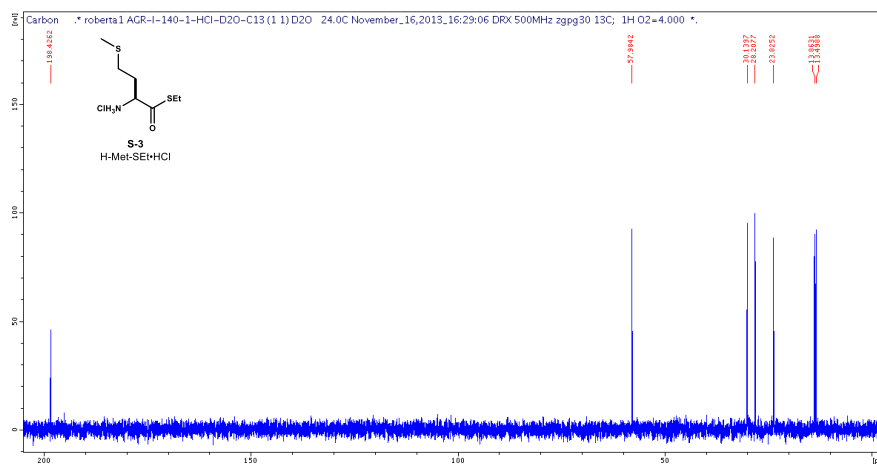

Figure 1.39B <sup>13</sup>C NMR spectrum of compound S-3 in D<sub>2</sub>O.

Compound (S-4).

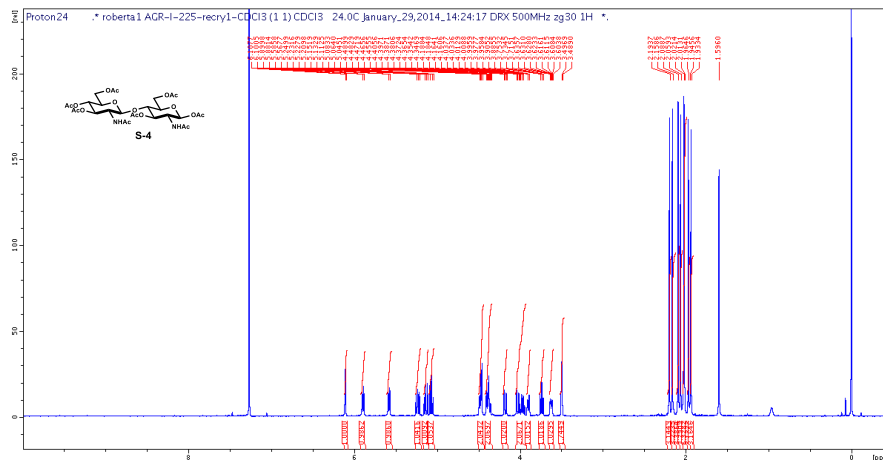

Figure 1.40A <sup>1</sup>H NMR spectrum of compound S-4.

Compound (S-4).

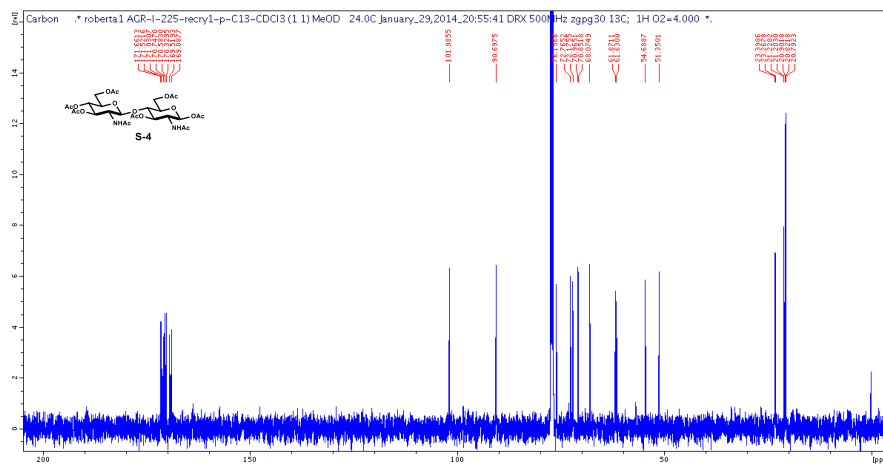

Figure 1.40B <sup>13</sup>C NMR spectrum of compound S-4.

Compound (S-5).

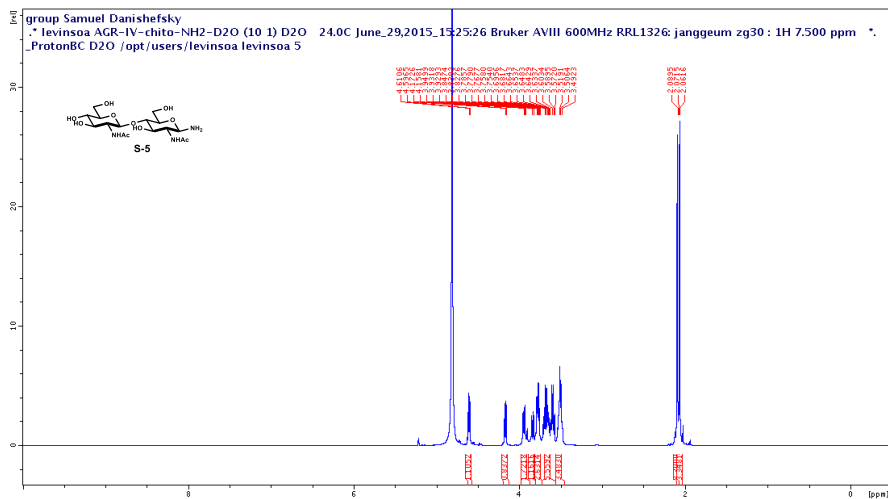

Compound (S-5).

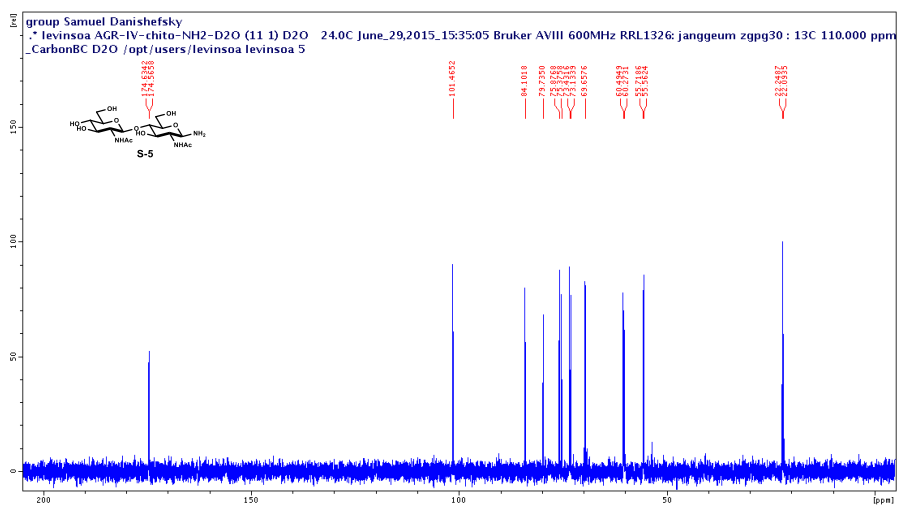

| Cys36-Cys42<br>KLCATYKLC <sup>+</sup> HPEE | Cys36 – Cys42 S-S Bond, Sequence Lys34-Glu46 |          |          |
|--------------------------------------------|----------------------------------------------|----------|----------|
|                                            | +1                                           | +2       | +3       |
|                                            | 1532.7236                                    | 766.8654 | 511.5794 |

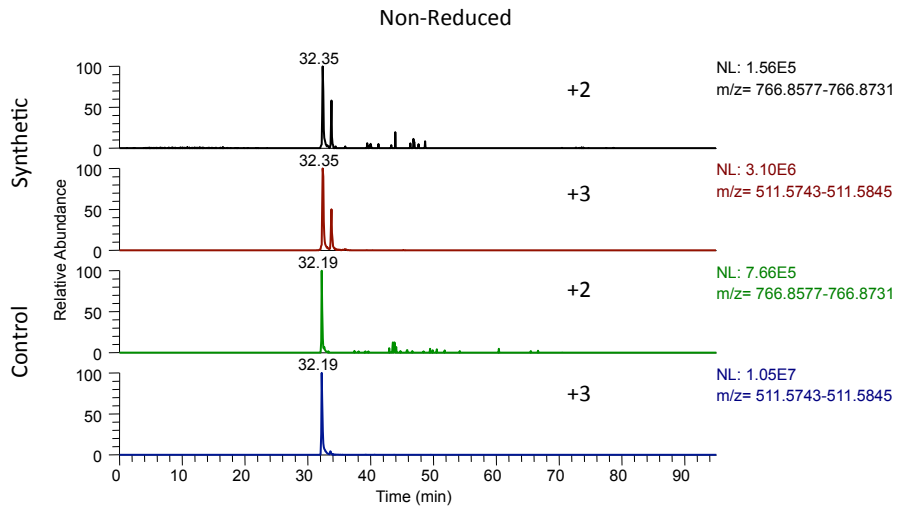

**Figure S-3.** Data for non-reduced analysis of synthetic G-CSF (2a) and recombinant G-CSF (2b), Lys34-Glu46

| Cys36-Cys42<br>KLCATYKLC <sup>+</sup> HPEE | Cys36 – Cys42, 2 x SH Reduced, Sequence Lys34-Glu46 |          |          |
|--------------------------------------------|-----------------------------------------------------|----------|----------|
|                                            | +1                                                  | +2       | +3       |
|                                            | 1534.7392                                           | 767.8733 | 512.2513 |

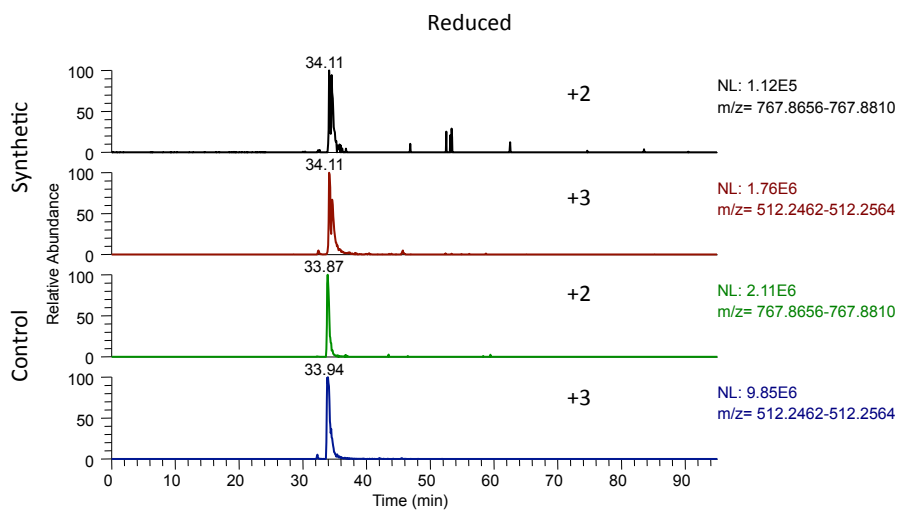

**Figure S-4.** Data for reduced analysis of synthetic G-CSF (2a) and recombinant G-CSF (2b), Lys34-Glu46.

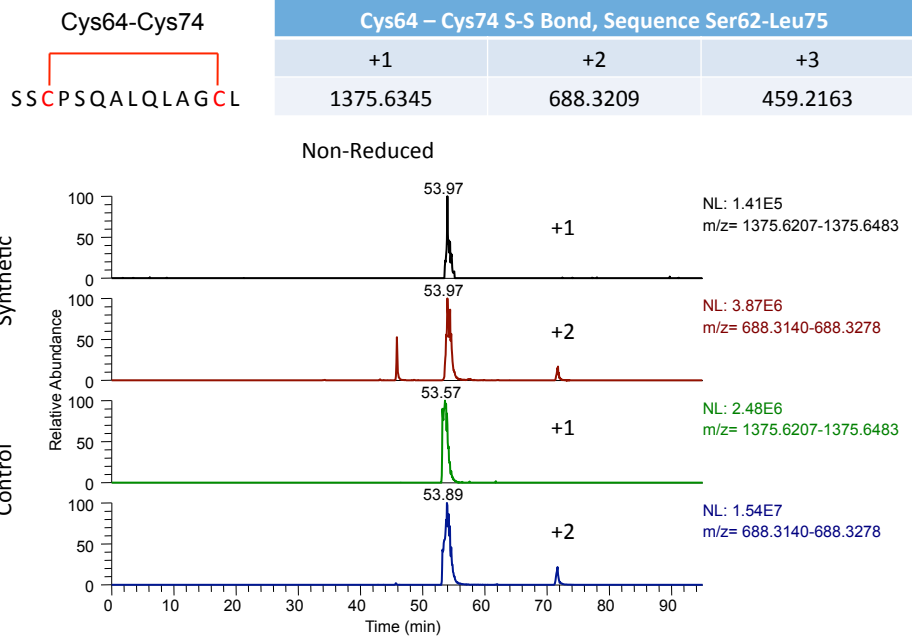

Figure S-5. Data for reduced analysis of synthetic G-CSF (2a) and recombinant G-CSF (2b), Ser62-Leu75.

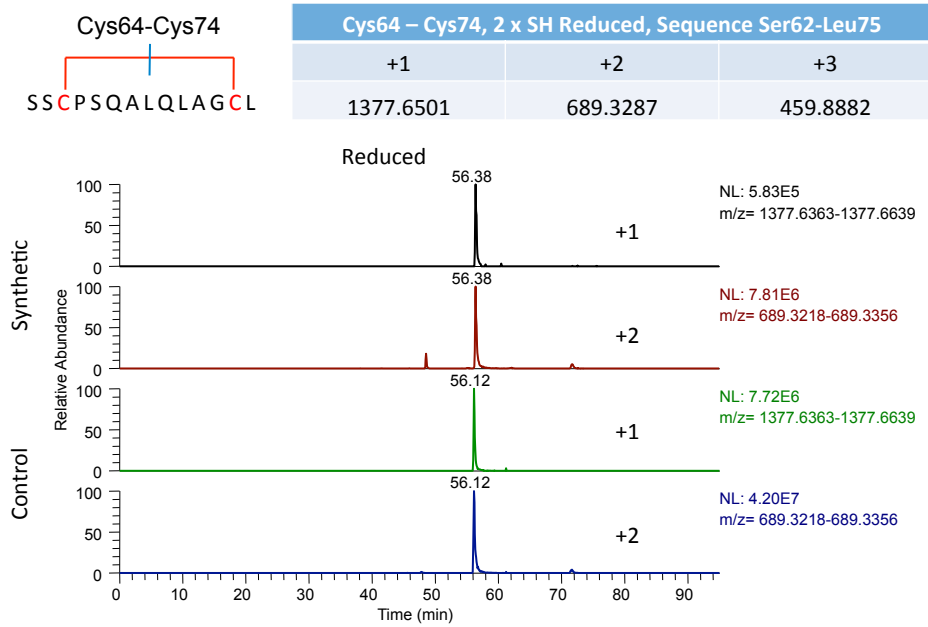

Figure S-6. Data for reduced analysis of synthetic G-CSF (2a) and recombinant G-CSF (2b), Ser62-Leu75.
